*IgaA negatively regulates the Rcs Phosphorelay via contact with RcsD*

1

2 **Negative regulation of the Rcs phosphorelay via IgaA contact with the RcsD phosphotransfer**  
3 **protein**

4 Short title: IgaA-RcsD interaction for control of the Rcs Phosphorelay

5 Erin A. Wall<sup>1</sup>, Nadim Majdalani, and Susan Gottesman\*

6 Laboratory of Molecular Biology, Laboratory of Molecular Biology, Center for Cancer Research,  
7 NCI, Bethesda, Maryland, 20892

8 \*Corresponding author

9 1. Current address: 10903 New Hampshire Avenue, Building 22 Rm 5185, Silver Spring,  
10 MD 20993, Food and Drug Administration, Office of Pharmaceutical Quality

11

12

*IgaA negatively regulates the Rcs Phosphorelay via contact with RcsD*

13 **Abstract**

14           Two-component systems and phosphorelays play central roles in the ability of bacteria  
15 to rapidly respond to changing environments. In *E. coli* and related enterobacteria, the  
16 complex Rcs phosphorelay is a critical player in changing bacterial behavior in response to  
17 antimicrobial peptides, beta-lactam antibiotics, and other challenges to the cell surface. The  
18 Rcs system is unusual in that IgaA, an inner membrane protein, is essential due to its negative  
19 regulation of the RcsC/RcsD/RcsB phosphorelay. While it has previously been shown that IgaA  
20 transduces signals from the outer membrane lipoprotein RcsF, how it interacts with the  
21 phosphorelay was unknown. Here we use in vivo interaction assays and genetic dissection of  
22 the critical proteins to demonstrate that IgaA interacts with the phosphorelay protein RcsD, and  
23 that this interaction is necessary for regulation. Interactions in periplasmic domains of these  
24 two proteins anchor repression of signaling. However, the signaling response depends on a  
25 weaker interaction between cytoplasmic loop 1 of IgaA and a truncated PAS domain in RcsD. A  
26 point mutation in the PAS domain increases interactions between the two proteins and is  
27 sufficient to abolish induction of this phosphorelay. RcsC, the histidine kinase that initiates  
28 phosphotransfer through the phosphorelay, appears to be indirectly regulated by IgaA via the  
29 contacts with RcsD. Unlike RcsD, and unlike many other histidine kinases, the periplasmic  
30 domain of RcsC is not necessary for the response to inducing signals. The multiple contacts  
31 between IgaA and RcsD form a poised sensing system, preventing over-activation of this  
32 apparently toxic phosphorelay but allowing it to be rapidly and quantitatively responsive to  
33 signals.

34

*IgaA negatively regulates the Rcs Phosphorelay via contact with RcsD*

35 **Author Summary**

36           The Rcs phosphorelay plays a central role in allowing enterobacteria to sense and respond to  
37 antibiotics, host-produced antimicrobials, and interactions with surfaces. A unique negative regulator,  
38 IgaA, keeps signaling from this pathway under control when it is not needed, but how it controls the  
39 phosphorelay has been unclear. We define a set of critical interactions between IgaA and the  
40 phosphotransfer protein RcsD. A periplasmic contact between IgaA and RcsD provides a necessary  
41 inhibition of Rcs signaling, modulated further by regulated interactions in the cytoplasmic domains of  
42 each protein. This multipartite interaction provides a sensitive regulatory switch.

*IgaA negatively regulates the Rcs Phosphorelay via contact with RcsD*

43

44 **Introduction**

45 Bacteria must constantly monitor their cell wall and envelope integrity to withstand  
46 environmental insult. Osmotic stress, redox stress and envelope disruption demand that the  
47 bacterium remodel its exterior to provide protection, often in the form of capsular  
48 polysaccharide. Enterobacterales use the Rcs phosphorelay to integrate complex signals from  
49 the outer membrane and periplasm, changing gene regulation in response to stress [1, 2]. The  
50 Rcs phosphorelay is a complex signal transduction pathway, involving an outer membrane  
51 lipoprotein (RcsF) and three inner membrane proteins (IgaA, RcsC and RcsD), leading to changes  
52 in the phosphorylation of the transcriptional regulator (RcsB). The Rcs phosphorelay regulates  
53 production of virulence-associated capsules as well as motility and the expression of many  
54 stress-related genes.

55 Signaling through the pathway is complex, and not fully understood. Briefly, outer  
56 membrane stress such as cationic polypeptides or cell wall stresses such as beta-lactams cause  
57 RcsF to change its interaction with IgaA (originally identified in *Salmonella* and named for  
58 intracellular growth attenuation; the *E. coli* version of this gene, *yrfF*, is referred to here as  
59 IgaA). The activated RcsF/IgaA interaction allows the hybrid histidine kinase RcsC to auto-  
60 phosphorylate and then pass phosphate to phosphorelay protein RcsD, a process studied here,  
61 which passes it to response regulator RcsB (Figure 1A). Over-signaling through the  
62 phosphorelay leads to cell death, possibly because of the global nature of the RcsB regulon.  
63 IgaA is essential because of its role as a gating/braking mechanism for the phosphorelay.  
64 Deletion of IgaA is only possible in cells containing mutations in RcsC, RcsD, or RcsB. For this



*IgaA negatively regulates the Rcs Phosphorelay via contact with RcsD*

65 reason, the poorly understood IgaA mechanism of action is of key interest. Multiple studies  
66 have focused on the interaction of RcsF with IgaA when cell wall stress is detected [3-7] , but  
67 the downstream action of IgaA is less well understood [8]. In this work we define RcsD as the  
68 direct binding partner of IgaA and define the regions in RcsD that are critical for interaction  
69 with IgaA. Production of RcsD variants that are deficient in IgaA binding cause massive over-  
70 signaling, mucoidy, and often cell death, consistent with phenotypes seen upon loss of IgaA  
71 itself. These results contrast with previous assumptions that IgaA was likely to directly interact  
72 with and regulate the histidine kinase RcsC, because RcsC initiates the phosphorelay.

73

## 74 **Results**

### 75 **A sensitive and flexible assay for the Rcs phosphorelay.**

76 We have revisited the Rcs signaling pathway using a newly developed sensitive in vivo  
77 fluorescent reporter assay. RprA is a small RNA that is a sensitive, specific target of Rcs  
78 regulation. RprA levels are nearly undetectable in the absence of RcsB, its direct transcriptional  
79 activator, and increase in cells in which the Rcs system is activated, for instance by  
80 constitutively active *rscC* mutations [9]. A *rprA* transcriptional fusion to mCherry allows  
81 continuous detection of a wide range of Rcs activation levels, using a plate reader. This growth  
82 and fluorescence assay can be viewed as a function of fluorescence over average OD, showing a  
83 large, early change in slope when a given strain is induced to respond to an Rcs stimulus (Fig  
84 S1A-C). Bar graphs of fluorescence at OD<sub>600</sub> 0.4. Figure 1B shows the increase in signal when  
85 wild-type cells are exposed to a small molecule stimulator of Rcs signaling, the non-toxic  
86 cationic polymyxin B nonapeptide (PMBN). PMBN stimulus is a useful indicator of pathway

*IgaA negatively regulates the Rcs Phosphorelay via contact with RcsD*

87 status; normal signaling yields a measured level of response to PMBN, while pathway  
88 disruptions (modification or deletion of pathway components) cause dampened or loss of  
89 PMBN response. Cells deleted for *rscB* lose all signal, including the low basal level seen in the  
90 absence of PMBN (Fig 1B, S1A-C Fig). The absence of RcsF lowers overall signal (compare  
91  $\Delta rcsF::chl$ , - PMBN, to WT, - PMBN); this decrease has been reported before [3, 10-12], but is  
92 particularly clear with this assay. Lack of RcsF also greatly dampens response to an outer  
93 membrane stress like PMBN (Fig 1B). It is known that Rcs signaling can be induced in the  
94 absence of RcsF, so the small activation of the *rscF::chl* strain in the presence of PMBN is  
95 possibly stimulating Rcs in this (still unexplored) manner [10, 13]; (Majdalani et al,  
96 unpublished).

97         The hybrid histidine kinase RcsC and the phosphorelay protein RcsD play both positive  
98 and negative roles in regulation of RcsB activity. Loss of RcsC or RcsD blocks the response to  
99 PMBN, but also lead to significantly higher levels of  $P_{rprA}$ -mCherry in the absence of normal  
100 inducing signal (Fig 1B). This is consistent with previous work, in which expression of an  $P_{rprA}$ -  
101 *lac* reporter was increased upon deletion of *rscC* or *rscD* [9, 11]. Deletion of *rscC* is thought to  
102 cause the loss of ability to de-phosphorylate RcsB that has acquired phosphate from other  
103 sources [14-16]. In our assay conditions, the *rscC* deletion strain produces a signal that is 3-4  
104 fold above WT.

105         The *rscD* deletion shown, *rscD541*, increased  $P_{rprA}$ -mCherry expression in a manner  
106 similar to the *rscC* deletion. *rscD* is encoded upstream of *rscB*, with the major promoters for  
107 *rscB* inside the *rscD* coding region [17]. This affects the way *rscD* deletion alleles can be  
108 constructed. In addition, in both *Salmonella* and *E. coli*, some transcripts from the *rscD*

*IgaA negatively regulates the Rcs Phosphorelay via contact with RcsD*

109 promoter may continue through to *rcsB*, though apparently at a much lower level [17, 18].  
110 Four different *rcsD* alleles were examined, each designed to leave the *rcsB* promoters intact  
111 (S1D Fig). These include *rcsD* carrying an H842A mutation in the phosphotransfer domain  
112 active site, as well as *rcsD* containing stop codons after codon 841 (*rcsD841\**). The overall  
113 amount of P<sub>rprA</sub>-mCherry expression seems to differ modestly between *rcsD541* and *rcsD543*,  
114 even though the deleted regions in both alleles share the same boundaries. *rcsD541* also gave  
115 higher P<sub>rprA</sub>-mCherry signal than the point mutants (S1D Fig). When checked by western blot  
116 with a polyclonal RcsD antibody, it is evident that *rcsD541*, *rcsD543* and *rcsD841\** are all devoid  
117 of detectable RcsD (S1E Fig). As previously seen [11], *rcsD541* and *rcsD543* had no significant  
118 effect on RcsB levels, nor did *rcsD* H842A and *rcsD841\** (S1E Fig, right panel).

119 The somewhat increased level of P<sub>rprA</sub>-mCherry common to all *rcsD* and *rcsC* strains is  
120 likely in part due to phosphorylation of RcsB by the small molecule acetyl phosphate (AcP), in  
121 the absence of the dephosphorylation carried out by RcsD and RcsC [15, 19]. The influence of  
122 AcP can be demonstrated in an *ackA* deletion strain that builds up large amounts of AcP [15]  
123 (S1F Fig). While WT cells showed a modest increase in signal in the *ackA* mutant (compare  
124 black and gray bars), all tested *rscC* and *rscD* mutations produced high levels of P<sub>rprA</sub>-mCherry I  
125 the *ackA* mutant, consistent with failure to dephosphorylate RcsB (S1F Fig). The increase in  
126 signal is fully dependent upon RcsB (last bar in graph, S1F).

127

128 **IgaA and RcsD interact directly**

129 We began interrogating how IgaA might interfere with Rcs signaling by examining the  
130 interactions of IgaA with downstream members of the phosphorelay, using the bacterial

*IgaA negatively regulates the Rcs Phosphorelay via contact with RcsD*

131 adenylate cyclase two hybrid assay (BACTH). In this assay, cells produce beta-galactosidase  
132 when Bordetella adenylate cyclase fragments (T18 and T25, Cya) are reconstituted by fusion to  
133 interacting proteins in a cyclase-defective host [20, 21]. IgaA interacted robustly with RcsD in  
134 two orientations (IgaA-T18/RcsD-T25 and IgaA-T25/RcsD-T18), expressing beta-galactosidase  
135 activity approximately 20-fold greater than either fusion paired with an empty cognate vector,  
136 the standard background control (Fig 2A; S2A Fig). This interaction occurred irrespective of the  
137 chromosomal presence or absence of other Rcs members (S2B,C Fig). However, no significant  
138 interaction was detected between IgaA and RcsC in parallel assays (Fig 2A, S2B,D Fig).

139         The IgaA, RcsD, and RcsC fused to Cya fragments were all tested for their ability to  
140 function in the Rcs phosphorelay and were found to be functional (see Materials and Methods,  
141 S2E Fig); blots for the proteins showed the expected bands (S2F Fig). Therefore, lack of  
142 interaction by RcsC in the bacterial two-hybrid assay cannot be attributed to significant  
143 misfolding or lack of protein. These results suggest that IgaA interacts with RcsD but does not  
144 interact with RcsC in this assay.

145         Regions in RcsD necessary and sufficient for interaction with IgaA were defined in the  
146 bacterial two-hybrid assay (Fig 2B). Using C-terminally truncated RcsD constructs, we found  
147 that IgaA bound just as well to RcsD<sub>N-683</sub> (RcsD without the ABL and Hpt domains) as it did to  
148 wild type. It also bound to RcsD<sub>N-522</sub> (no HATPase, ABL or Hpt domains), but less strongly than  
149 to wild type or RcsD<sub>N-683</sub>. The interactions were unaffected by the presence of RcsD in the  
150 chromosome (S2G Fig). Strikingly, RcsD<sub>N-462</sub> also bound IgaA almost as well as full length RcsD  
151 (Fig. 2B). This region is predicted to contain an incomplete Per-Arndt-Sim (PAS) domain (shown  
152 on the graphic as “PAS” to emphasize that it is not a complete PAS domain), which has been

*IgaA negatively regulates the Rcs Phosphorelay via contact with RcsD*

153 associated with signal detection in sensor histidine kinases [22]. A further truncation, removing  
154 most of the cytoplasmic regions upstream of the HATPase domain (RcsD<sub>N-383</sub>), did not produce a  
155 measurable IgaA interaction, suggesting a critical role for at least some of the cytoplasmic  
156 domain. A fully cytoplasmic RcsD construct (RcsD<sub>326-C</sub>) that began directly after the membrane-  
157 bound portion and included the rest of the RcsD C-terminus also failed to show any detectable  
158 interaction with IgaA. Finally, a construct in which the periplasmic region was deleted (RcsD<sub>Δ45-</sub>  
159 <sub>304</sub>) still interacts with IgaA, although only at a level of about half that seen with the WT  
160 construct (Fig 2B).

161         These results are most consistent with RcsD interactions with IgaA both within the  
162 trans-membrane/periplasmic portion of RcsD and within the initial cytoplasmic regions  
163 (bounded perhaps by residue 462), with neither interaction sufficient for a full signal in this  
164 two-hybrid assay. Intriguingly, the constructs that gave positive interactions (RcsD<sub>N-522</sub>, RcsD<sub>N-</sub>  
165 <sub>683</sub> and RcsD<sub>N-462</sub>, but not RcsD<sub>N-383</sub> and RcsD<sub>326-C</sub>) also caused mucoidy, a reflection of activation  
166 of the Rcs phosphorelay, in the cloning strain (Stellar *E. coli*, Clontech), which is wild-type for all  
167 genes of the Rcs phosphorelay. This was further examined, using the P<sub>rprA</sub>-mCherry assay.

168

169 **Titration of IgaA by overexpression of truncated RcsD**

170         If IgaA repression of Rcs signaling depends on the direct interaction of RcsD with IgaA,  
171 suggested by the BACTH results, overproduction of the regions of RcsD sufficient for this  
172 interaction may titrate IgaA away from the chromosomally-encoded RcsD, allowing unregulated  
173 signaling through the Rcs phosphorelay. The same RcsD fragments studied in the BACTH  
174 experiments were cloned without tags into a pBAD24 plasmid, under the control of the

*IgaA negatively regulates the Rcs Phosphorelay via contact with RcsD*

175 arabinose-inducible pBAD promoter. In this plasmid in the absence of arabinose, RcsD is  
176 expressed levels sufficient to complement the modest increase in signal seen in an *rcsD* mutant  
177 (Fig 3A, right panel; compare RcsD to V); the protein is significantly overexpressed in the  
178 presence of arabinose. These plasmids were assayed in both *rcsD*<sup>+</sup> and *rcsD541* strains  
179 containing the P<sub>rprA</sub>-mCherry reporter fusion. We would expect the WT strain to be active for  
180 the reporter when the Rcs phosphorelay is activated. Indeed, in the *rcsD*<sup>+</sup> host, overproduction  
181 after arabinose induction of RcsD fragments capable of interacting with IgaA (RcsD<sub>N-683</sub>, RcsD<sub>N-</sub>  
182 <sub>525</sub> and RcsD<sub>N-462</sub>) activated the P<sub>rprA</sub>-mCherry fusion, while RcsD<sub>N-383</sub>, which was negative for  
183 interaction with IgaA (Fig 2B), did not (Fig 3A, S3A Fig). Significant cellular growth arrest and  
184 lysis occurred when RcsD<sub>N-683</sub> or RcsD<sub>N-525</sub> were overproduced (in the presence of arabinose),  
185 making them difficult to compare quantitatively to non-lysed cells. In S3A Fig, their activation  
186 at lower ODs (before lysis) is shown, and fluorescence graphed as a function of the OD  
187 throughout growth is shown.

188         The ability of fragments to activate in an *rcsD*<sup>+</sup> host correlates well with ability to  
189 interact with IgaA in the bacterial two-hybrid assay, consistent with the model that activation  
190 by overproduction is a result of binding to and titrating IgaA, freeing the wild-type RcsD to  
191 signal. These results reinforce the conclusion from the BACTH assays that at least two regions of  
192 RcsD interact with IgaA. Both regions are necessary for efficient titration, one region  
193 presumably between 1-383 (encompasses trans-membrane and periplasmic region), present in  
194 all the titrating plasmids, but not sufficient for titration, and a second region between 383 and  
195 462 (including the incomplete PAS-like domain).

*IgaA negatively regulates the Rcs Phosphorelay via contact with RcsD*

196 Note that overexpressing full-length RcsD did not induce mucoidy or signaling. Since the  
197 full-length protein has all regions that should bind and titrate IgaA, this result suggests the  
198 possibility that the C-terminal domains of RcsD, missing in all the activating/titrating  
199 truncations, might play a negative role that blocks or is epistatic to the titration seen with the  
200 truncated plasmids. This is consistent with the report that the ABL domain can bind and inhibit  
201 phosphorylation of RcsB [23], and is confirmed below.

202 The RcsD Hpt domain is necessary for transmitting a signal from the RcsC response  
203 regulator domain to RcsB [24]. Therefore, we expected that plasmids expressing truncated  
204 RcsD constructs that lack the Hpt domain would be completely unable to activate the  
205 phosphorelay in a strain mutant for *rcsD*. In the *rcsD541* mutant allele background, the basal  
206 level of expression is above that in a WT host (Fig 1B, Fig 3A, compare V to WT V); a plasmid  
207 expressing the intact RcsD reduces  $P_{r_{prA}}$ -mCherry expression to levels comparable to the WT  
208 strain, consistent with complementation of the *rcsD541* mutant (Fig. 3A). The activating  
209 fragment RcsD<sub>N-462</sub> did not induce significant  $P_{r_{prA}}$ -mCherry activity in this host, consistent with  
210 expectation, since it does not contain the Hpt domain (Fig 3A).

211 Unexpectedly, cells expressing somewhat longer RcsD fragments, truncations RcsD<sub>N-522</sub>  
212 and RcsD<sub>N-683</sub>, both missing the Hpt domain, were able to significantly increase signal when  
213 induced in the *rcsD541* host (S3A Fig). However, these same plasmids caused lysis in WT and  
214 *rcsD541* cells (S3A Fig). These constructs contain regions of RcsD that are not well understood,  
215 including an ancestral histidine kinase structure between residues 462 and 683. To further  
216 investigate the basis for this unexpected signaling, the same plasmids were tested in three  
217 additional *rcsD* mutants (S3B Fig). In a strain with a chromosomal mutation in the

*IgaA negatively regulates the Rcs Phosphorelay via contact with RcsD*

218 phosphotransfer active site, RcsD H842A, or in a strain containing a stop codon at residue 842,  
219 right before the active site (*rcsD841\**), the RcsD<sub>N-522</sub> and RcsD<sub>N-683</sub> truncations did not raise the  
220 level of P<sub>rprA</sub>-mCherry, suggesting that the nature of the chromosomal *rcsD* mutation is  
221 contributing to the effect caused by overproduction of the fragments (S3B Fig). An intact Hpt  
222 domain in the chromosomal copy of *rcsD* appears to be necessary to allow this modest  
223 activation, possibly suggesting that the *rcsD541* mutant may express a low level of the Hpt  
224 domain. This signaling is fully dependent upon RcsB (S3C Fig). Why some of our truncated  
225 constructs but not others act in this way is not further investigated here.

226

227 **Signaling by RcsD alleles with reduced capacity to interact with IgaA**

228 Plasmids carrying C-terminal portions of RcsD (and thus the Hpt domain) were  
229 constructed and tested in both the WT and *rcsD541* strain. Expression of the ABL-Hpt domains  
230 (RcsD<sub>686-C</sub>), the Hpt domain alone (RcsD<sub>792-C</sub>), the cytoplasmic portion of RcsD (RcsD<sub>326-C</sub>), or an  
231 *rcsD* allele deleted for the periplasmic region (*rcsD*<sub>Δ45-304</sub>) did not induce signaling in wild type  
232 cells (Fig 3B, left panel). However, each of these plasmids led to significantly increased signaling  
233 in the *rcsD541* strain, even in the absence of arabinose (Fig 3B). The cytoplasmic portion of  
234 RcsD (RcsD<sub>326-C</sub>), which had no effect on signal in *rcsD*<sup>+</sup> cells, led to a 12-fold increase in signal in  
235 *rcsD541* over the vector control, approximately a 24-fold increase over the normal wild type  
236 level of signal (Fig. 3B), grew poorly (6 hour OD<sub>600</sub> of 0.12, used in Fig 3B), and colonies  
237 containing this plasmid became mucoid in the absence of arabinose. Less pronounced  
238 induction of signaling was seen in cells expressing the ABL-Hpt domain or the Hpt domain alone  
239 in the absence of arabinose. These results are fully consistent with the idea that IgaA represses



*IgaA negatively regulates the Rcs Phosphorelay via contact with RcsD*

240 signaling via interactions with regions in the N-terminus of RcsD; expression of derivatives of  
241 RcsD that retain the Hpt domain (and thus can transfer signal from RcsC to RcsB) but that have  
242 lost or compromised the IgaA interaction region are now able to activate in the absence of an  
243 inducing signal such as PMBN.

244 We confirmed that this high level of signal is dependent upon RcsC; in an *rscCD* double  
245 mutant, expression of RcsD<sub>326-C</sub> or RcsD Hpt (*rscD*<sub>792-C</sub>) does not give rise to signal above the  
246 value obtained by adding full length RcsD back to an *rscCD* double mutant (S3D Fig). The  
247 properties of these fragments demonstrate clearly that phosphotransfer from RcsC to RcsB  
248 requires, minimally, the Hpt domain of RcsD, and that, in the absence of the IgaA/RcsD  
249 inhibitory interaction, RcsC promotes high, constitutive signaling. Finally, because this signaling  
250 is not seen in an *rscD*<sup>+</sup> strain, signaling by these fragments of RcsD is recessive to the full-length  
251 protein.

252 As noted above, it has been reported that overproduction of the RcsD ABL domain can  
253 bind and inhibit RcsB [23]. We further investigated this with overproduction of RcsD regions in  
254 our plasmids, testing their potential for induction by PMBN in cells carrying a wild-type  
255 chromosomal *rscD* copy (S3E Fig). If RcsB (or any other step in the pathway) is inhibited, we  
256 would expect to block PMBN induction.

257 Strikingly, while the RcsD plasmid does not affect PMBN-dependent induction in the  
258 absence of arabinose (low levels of RcsD), it fully inhibits it when arabinose is present (high  
259 levels of RcsD). The plasmid containing the ABL-Hpt domain (Rcs<sub>686-C</sub>) has a very similar profile,  
260 as predicted if the ABL domain is necessary for inhibition. RcsD<sub>Δ45-304</sub>, deleted for the  
261 periplasmic region, also acts similarly. The Hpt domain itself (RcsD<sub>792-C</sub>) was somewhat less

*IgaA negatively regulates the Rcs Phosphorelay via contact with RcsD*

262 effective in blocking PMBN signaling, consistent with a role for the ABL domain in inhibition.  
263 When these plasmids were expressed in a *rcsD541* host (S3F Fig), RcsD was still able to respond  
264 to PMBN without arabinose induction, but not with arabinose. High levels of the ABL-Hpt  
265 domain also inhibited the constitutive signaling otherwise seen with low levels of this RcsD  
266 fragment, confirming that the inhibition is independent of and downstream of the IgaA/RcsD  
267 interaction, not present for this piece of RcsD.

268 Two of the plasmids gave results that were more difficult to interpret. Expression of a  
269 full-length RcsD mutant for the active site histidine (RcsD H842A) had higher activity than  
270 expected in an *rcsD*<sup>+</sup> host but not in the *rcsD541* host (S3E and S3F Fig). Because this higher  
271 activity was seen with or without arabinose, the results suggest that the wild-type RcsD (from  
272 the chromosome) and RcsDH842A (from the plasmid) interact, increasing signaling through  
273 RcsD. It is also possible that even this low level of RcsDH842A allows some titration of IgaA. The  
274 other plasmid that gave unexpected results was RcsD<sub>326-C</sub>. In a wild-type host, this construct  
275 acts much like the vector control (low activity without PMBN, increase with PMBN), as if it lacks  
276 the inhibitory activity of some of the other constructs. While this might suggest that it is not  
277 made in significant amounts, it is clearly able to stimulate activity, independent of PMBN, in an  
278 *rcsD541* host (S3F Fig). It seems likely therefore that for this construct, interaction with RcsD<sup>+</sup>  
279 in the WT host interferes with the ability of the RcsD<sub>326-C</sub> both to signal (low activity – or +  
280 arabinose in *rcsD*<sup>+</sup> host) and to inhibit (vector-like activity with PMBN, rather than the inhibitory  
281 activity seen with ABL-Hpt, containing RcsD<sub>686-C</sub>). These results would suggest that the  
282 interaction with the chromosomal RcsD requires sequences upstream of the ABL domain, quite  
283 likely the defective HisKA and/or HATPase domains. HisKA domains have been shown to

*IgaA negatively regulates the Rcs Phosphorelay via contact with RcsD*

284 contain dimer interfaces in histidine kinases, and it seems quite possible that the mutant HisKA  
285 domain here participates in RcsD/RcsD interactions [25].

286         These results all suggest that in the absence of arabinose, the pBAD-RcsD constructs  
287 express levels of RcsD comparable to the chromosomal level, able to complement and signal  
288 but lacking the inhibitory activities seen only with high levels of RcsD achieved after induction  
289 with arabinose. To further confirm the behavior of the truncated RcsD proteins, selected alleles  
290 were introduced into the bacterial chromosome in place of the native *rcsD* gene. In these  
291 strains, RcsD should be expressed from the native promoter, at the native level. These alleles  
292 could generally be introduced into an *rcsB* deletion, where signaling is off, but some alleles  
293 were difficult to isolate or were clearly unstable in *rcsB*<sup>+</sup> cells. *rcsD*<sub>326-C</sub> and *rcsD*<sub>Δ48-304</sub> could be  
294 introduced into the *rcsB*<sup>+</sup> strain, but cells became quite mucoid and had significant PMBN-  
295 independent signaling; RcsD ABL-Hpt was better tolerated (S3G Fig). These results parallel the  
296 observations with the RcsD plasmids in an *rcsD541* strain (Fig 3B; S3F Fig).

297         Mutant strains were further tested for the ability to support deletion of *igaA*, by P1  
298 transduction from a *bioH*::kan<sup>R</sup> *igaA*::chl<sup>R</sup> donor (EAW66, containing a *bioH*::*kan* mutant closely  
299 linked to *igaA*::chl<sup>R</sup>, in a strain containing *rcsD541*), selecting for kanamycin resistance and then  
300 testing kanamycin resistant colonies for linkage of the *igaA*::chl<sup>R</sup> (S3H Fig). In a recipient  
301 defective for *rcsB*, *rcsC*, or *rcsD*, the linkage of the *bioH*::kan and *igaA*::chl<sup>R</sup> markers is >70%; in a  
302 strain WT for the Rcs phosphorelay, linkage was <1 chl<sup>R</sup>/100 kan<sup>R</sup>. Mutations in *rcsD* were  
303 introduced into the chromosome, and then used as recipients for P1 transduction (S3H Fig).  
304 Strains carrying the *rcsD541* and *rcsD841*\* mutations tolerated loss of *igaA* well, as expected for  
305 strains null for *rcsD* (S3H Fig).

*IgaA negatively regulates the Rcs Phosphorelay via contact with RcsD*

306 *rcsD*<sub>326-C</sub>, carrying all of the cytoplasmic regions of RcsD, did not tolerate loss of IgaA  
307 (S3H Fig). Although *chl*<sup>R</sup> colonies were isolated, those colonies had unstable phenotypes;  
308 restreaking yielded colonies that were not as mucoid or fluorescent as the parent strain,  
309 strongly suggesting that the *igaA* deletions were only surviving when mutations or deletions of  
310 components of the Rcs phosphorelay genes were also present. These results are fully  
311 consistent with the behavior of *rcsD*<sub>326-C</sub> on plasmids (Fig 3B), and consistent with the model  
312 that there are critical regulatory contacts between IgaA and RcsD not only in the periplasm but  
313 in the cytoplasmic domains as well. Thus, while *rcsD*<sub>326-C</sub> was negative in the bacterial two-  
314 hybrid interaction with IgaA (Fig 2B), the continued dependence on IgaA for viability is  
315 consistent with it retaining a critical contact with IgaA. As expected, deleting *rcsB* as well  
316 (EAW54, S3H Fig) allowed introduction of the *igaA::chl*<sup>R</sup> mutation.

317 Not all *rcsD* alleles could be introduced into the chromosome. *rcsD*<sub>Δ45-304</sub>, which retains  
318 a strong interaction with IgaA (Fig 2B) but interferes with cell growth when expressed from a  
319 plasmid in *rcsD*<sub>541</sub>, even without induction (Fig 3B), was lethal, and the chromosomal version  
320 of this mutant could not be constructed without accumulating secondary loss-of-function  
321 mutations in *rcsD* or *rcsB*. A chromosomal mutant derivative with a slightly longer periplasmic  
322 domain deletion, *rcsD*<sub>Δ48-304</sub>, could be constructed, but was mucoid, constitutively active (S3G  
323 Fig) and did not tolerate introduction of the *igaA* deletion (EAW106, S3H), consistent with a  
324 critical RcsD-IgaA contact that participates in repression beyond the periplasmic region. This  
325 allele may be modestly defective for phosphorelay function, and therefore is better tolerated  
326 than the *rcsD*<sub>Δ45-304</sub> allele.

*IgaA negatively regulates the Rcs Phosphorelay via contact with RcsD*

327 RcsD<sub>686-c</sub> (ABL-Hpt), which we expect to lack all regions involved in IgaA interaction, led  
328 to a lower level of signaling (S3G Fig), is non-mucoid, and, as expected, tolerates loss of *igaA*  
329 (EAW108, S3H Fig). We would suggest, based on its phenotypes, that this construct is not fully  
330 active for passing signal from RcsC to RcsB.

331 These results lead to the following conclusions: 1) the RcsD periplasmic region is  
332 essential for full interaction with IgaA and, most strikingly, for full inhibition by IgaA, but is not  
333 sufficient for binding or titration of IgaA. This is most consistent with a direct interaction of the  
334 RcsD periplasmic loop and IgaA. The precise role of the trans-membrane (TM) regions flanking  
335 the periplasmic loop have not yet been explored. 2) An additional region or regions of  
336 interaction exist, in the cytoplasmic PAS-like domain of RcsD; this interaction is not sufficient to  
337 allow IgaA-dependent repression, but presumably improves binding in the presence of the  
338 TM/periplasmic region (thus allowing binding to and titration of IgaA) and contributes  
339 significantly to repression by IgaA. 3) Constructs with the Hpt domain but lacking the  
340 periplasmic loop (or lacking both the periplasmic region and TM helices) of RcsD are capable of  
341 Rcs induction-independent signaling, presumably because they are blind to IgaA repression. 4)  
342 The Hpt domain on its own, or the full cytoplasmic domain, is recessive to RcsD<sup>+</sup>, and is thus not  
343 able to constitutively signal in the presence of functional RcsD.

344

345 **Critical residues in the cytoplasmic PAS-like domain of RcsD**

346 Alanine scanning mutagenesis of individual conserved residues in the PAS domain region  
347 of RcsD was carried out in the pBAD-RcsD plasmid. Plasmids were initially screened for level of  
348 fluorescence in an *rcsD541* mutant strain, in the absence of arabinose. In this assay, functional

*IgaA negatively regulates the Rcs Phosphorelay via contact with RcsD*

349 RcsD expressed from the plasmid reduces fluorescence by complementing the *rcsD541* allele,  
350 nulls would be expected to not affect fluorescence, and mutations that were capable of passing  
351 phosphate from RcsC to RcsB but were less sensitive to IgaA repression might be expected to  
352 have higher fluorescence (see right-hand panel in Fig. 3B, for example). Unexpectedly, many of  
353 the plasmids that appeared to give strong signals and were thus thought to possibly have  
354 become blind to IgaA instead had acquired stop codons. These mutants were not further  
355 investigated here. Thus, we instead focused on alanine mutants that retained function,  
356 measured by the ability to complement the *rcsD541* mutant, reducing the elevated signal found  
357 in this mutant to the lower level found in *rcsD*<sup>+</sup> strains (compare lane 1 and lane 3, S4A Fig).  
358 Among the six mutants screened, one was striking in that it was unresponsive to PMBN  
359 induction, suggesting that it somehow locked RcsD into an “off” configuration. This mutant  
360 allele, RcsD T411A, was further analyzed.

361 The *rcsD* T411A mutation was introduced into the chromosome and tested for its  
362 response to PMBN (Fig 4A). The mutant had a lower basal level of Rcs signaling and, as was  
363 seen with the plasmid-borne copy, this mutant had a very muted response to PMBN. A22, an  
364 inhibitor of MreB, and mecillinam have also been reported to induce the Rcs System [3, 26],  
365 and we confirmed that induction with our reporter (Fig 4A, WT). The T411A mutant also failed  
366 to respond to A22 or mecillinam (Fig 4A, red bars).

367 We can imagine two general ways in which T411A might block induction. It might affect  
368 the ability of signal to move through the phosphorelay, possibly locking RcsD in the  
369 “phosphatase” confirmation. In this case, we might expect it to be indifferent to the presence  
370 of IgaA. In the alternative model, *rcsDT411A* is locked off because it no longer releases the

*IgaA negatively regulates the Rcs Phosphorelay via contact with RcsD*

371 interaction with IgaA when signal is received; if so, it will still be sensitive to loss of IgaA. To  
372 test whether the RcsD T411A was causing a “locked” state in which the protein could no longer  
373 pass signal to RcsB, we tried to delete *igaA* in the chromosome. The strain did not tolerate IgaA  
374 deletion (EAW121, S3H Fig), which suggested that RcsD T411A abrogates activation by  
375 increased or changed interaction with IgaA.

376 We next turned to IgaA to begin to identify the regions likely to interact with RcsD.  
377 Based on our observations with the RcsD truncations, we would predict at least two regions of  
378 interaction between RcsD and IgaA: between the RcsD periplasmic region (critical for IgaA  
379 regulation) and the periplasmic region of IgaA, as well as additional important interactions  
380 between the cytoplasmic PAS-like region of RcsD (and possibly other regions) and cytoplasmic  
381 domains of IgaA.

382 The periplasmic domain of IgaA (see Fig 4B) has previously been found to interact with  
383 RcsF [8]. Here, we find that deletion of the periplasmic domain (IgaA<sub>Δ384-649</sub>) fully abrogates the  
384 interaction of RcsD and IgaA; T411A modestly restores this interaction, consistent with the  
385 mutant leading to increased interaction within the cytoplasmic regions (Fig 4B and S4B Fig).  
386 Deletion of either cytoplasmic loop 1 or cytoplasmic loop 2 of IgaA had essentially no effect on  
387 the interaction with wild-type RcsD, suggesting that the primary interactions that drive the  
388 bacterial two hybrid signal are between the periplasmic regions. Periplasmic point mutation  
389 L643P is a stable protein (S4C Fig) that caused a partial loss of function mutant in *igaA* [27]; this  
390 mutation led to loss of interaction of IgaA and RcsD (S4D Fig). However, other alleles at this  
391 position (L643A) or nearby did not disrupt interaction or activity (S4D and S4E Fig), suggesting  
392 that L643 is not itself a critical residue but that L643P may disrupt IgaA folding or localization.

*IgaA negatively regulates the Rcs Phosphorelay via contact with RcsD*

393 The specific regions within the IgaA periplasmic domain that contact RcsD remains for future  
394 analysis.

395 Chromosomal deletions of either one of the *igaA* cytoplasmic loops ( $\Delta 36-181$ , *cyt1*;  
396  $\Delta 263-330$ , *cyt2*) or of the periplasmic loop ( $\Delta 384-649$ , *peri*) (see Fig 4B) were constructed in  
397 cells mutant for *rcsD* and carrying the  $P_{\text{rprA}}$ -mCherry reporter. A complete *igaA* deletion was  
398 used for comparison. Introduction of the RcsD plasmid, even in the presence of glucose (low  
399 levels of RcsD expressed) was poorly tolerated in all the *igaA* deletions, with secondary  
400 mutations arising at a rapid rate (see inset, Fig 4C). Therefore, assays in liquid were considered  
401 untrustworthy, and the phenotypes of the primary transformants were evaluated on agar  
402 plates (Fig 4C).

403 Transformation of the RcsD plasmid into cells carrying a deletion of *igaA*, the *igaA*  
404 periplasmic domain (*igaA*  $\Delta 384-649$ ) or the second cytoplasmic domain (*igaA*  $\Delta 263-330$ ) gave rise to  
405 highly mucoid growth, consistent with lack of IgaA function. Introduction of the RcsD<sup>+</sup> plasmid  
406 into cells deleted for the first cytoplasmic domain (*igaA*  $\Delta 36-181$ ) gave less mucoid growth,  
407 although the  $P_{\text{rprA}}$ -mCherry reporter was well expressed compared to WT and *rcsD541* (Fig 4C  
408 left panel), consistent with an important role for this domain of IgaA as well. The plasmid  
409 expressing RcsDT411A rather than RcsD<sup>+</sup> was introduced into these strains. This mutation was  
410 unable to decrease the signal in the full deletion of *igaA* or the deletion of the periplasmic  
411 domain. However, it reduced mucoidy and allowed more robust colony growth in cells carrying  
412 the second cytoplasmic domain deletion (Fig 4C). This result is most consistent with RcsDT411A  
413 improving the interaction with IgaA cytoplasmic loop 1 and therefore abrogating induction (Fig  
414 4A).



*IgaA negatively regulates the Rcs Phosphorelay via contact with RcsD*

#### 415 **Analysis of RcsC domains and involvement in signaling.**

416 From previous work, it is clear that RcsC plays an essential role in signaling in the Rcs  
417 phosphorelay, as the source of phosphorylation [16]. However, as shown above, full length  
418 RcsC did not interact with IgaA in the bacterial two hybrid assay. The plasmids expressing T18  
419 and T25 fusions to full-length RcsC interfered with cell growth, and also did not interact with  
420 RcsD, and thus while our data strongly supports the interaction of IgaA with RcsD, we are  
421 cautious in interpreting this negative result with RcsC and IgaA. A construct expressing only the  
422 cytoplasmic domains of RcsC (*rscC*<sub>326-C</sub>) interacts well with RcsD as well as with the cytoplasmic  
423 regions of RcsD, although a bit less strongly (S5A Fig). It interacts as well with a version of RcsD  
424 missing residues beyond aa 683 (RcsD<sub>N-683</sub>), but not at all with RcsD<sub>N-525</sub>, suggesting that the  
425 region between aa 525 and 683 of RcsD, including its inactive HATPase domain is essential for  
426 this interaction (S5A Fig). Given that phosphate flows from the C-terminal REC domain of RcsC  
427 to the RcsD Hpt domain, we would predict a further, possibly transient, interaction between  
428 the RcsC REC domain and the RcsD Hpt domain.

429 Unlike RcsD, RcsC constructs in pBAD24 were often cytotoxic, causing massive cell lysis  
430 without any detectable increase in *P*<sub>rprA</sub>-mCherry signal above background, and slow growth  
431 even in rich defined glucose media, where the pBAD promoter should be only modestly active.  
432 To avoid this overproduction toxicity, deletions and substitutions of interest were introduced  
433 into the chromosomal copy of *rscC* and tested for response to induction by PMBN. RcsC  
434 carrying a mutation in the kinase active site (H479A) had low activity and was not responsive to  
435 PMBN, as expected (Fig 5A). Note that the activity in this mutant is more like the wild-type

*IgaA negatively regulates the Rcs Phosphorelay via contact with RcsD*

436 strain without PMBN than like the deletion of *rscC* (Fig 5A), in support of experiments reported  
437 by Clarke et al that the active site His is not necessary for phosphatase activity [16].

438           Unexpectedly, a deletion of the periplasmic portion of RcsC, leaving the TM helices  
439 (*RcsC<sub>Δ48-314</sub>*), had a lower basal level of signal than WT, yet responded strongly to PMBN and  
440 A22 (Fig 5 A, B). This allele still requires RcsF for PMBN signal detection, which suggests that  
441 this signal comes from RcsF through IgaA to RcsD to RcsC (Fig 5A). Cells carrying the *rscC<sub>Δ48-314</sub>*  
442 mutation tolerate IgaA deletion, although they become mucoid and unstable (EAW70, S3H Fig);  
443 deletion of *rscC* or *rscCH479A* was unaffected by loss of *igaA* (S3H Fig). We suggest that this  
444 allele has a modestly decreased ability to signal, which in other experiments allows cells to  
445 support deletion of *igaA*. Overall, this result strongly suggests that IgaA regulation of the  
446 phosphorelay and signal transduction via RcsF are not acting through the periplasmic loop of  
447 RcsC.

448           Although the periplasmic region is not necessary for RcsC function, it would appear that  
449 membrane association is. Cells carrying a deletion of the membrane spanning portion (*RcsC<sub>326-</sub>*  
450 *c*) acted in a similar manner to an *rscC* deletion, with a constitutive level of reporter expression  
451 and no response to PMBN (Fig 5A). Consistent with a loss of function for the *rscC<sub>326-c</sub>* allele, the  
452 deletion of *igaA* could be introduced into this strain, and cells remained non-mucoid (EAW56,  
453 S3H Fig). A chimeric construct in which the MalF TM and periplasmic region replaced the *rscC*  
454 periplasmic region restored the ability of the cell to respond to PMBN (S5B Fig), albeit with a  
455 higher basal level of signaling in the absence of PMBN. Finally, a series of periplasmic deletions  
456 with different linker lengths all responded to PMBN to some extent, although constructs with  
457 shorter turns had somewhat lower basal levels (S5B Fig).

*IgaA negatively regulates the Rcs Phosphorelay via contact with RcsD*

458                   Although these results demonstrate that the RcsC periplasmic region is not  
459 necessary for sensing the OM stress signal elicited by PMBN, it seemed possible that other  
460 inducing stresses, such as mecillinam or A22, might act in a way that was dependent upon the  
461 periplasmic region of RcsC. This was tested in our system and demonstrated that the RcsC $\Delta_{48-}$   
462  $_{314}$  mutation still showed induction in response to all three stimuli (Fig 5B). These additional Rcs  
463 stimuli elicited an increase in P<sub>rprA</sub>-mCherry that had less dynamic range and more cell death  
464 than PMBN. At the published concentrations, A22 (5  $\mu$ g/mL; Sigma) and Mecillinam (0.3  $\mu$ g/mL;  
465 Sigma) could induce the WT strain and the RcsC $\Delta_{48-314}$  strain, while RcsDT411A failed to respond  
466 (Fig 4A). Therefore, for A22 and Mecillinam, as for PMBN, the *rscC* periplasmic region is not  
467 required for sensing and responding to signal.

468

469 **DISCUSSION**

470                   The results reported here provide a new view of how IgaA transduces inducing signals  
471 within the complex Rcs phosphorelay (Fig 1A). IgaA, a multipass membrane protein, is a strong  
472 negative regulator of Rcs. As previously described, signals, such as PMBN, believed to disrupt  
473 LPS interactions, or A22 and Mecillinam, peptidoglycan disruptors, change the nature of the  
474 RcsF/IgaA interaction. This leads to a change, presumably a decrease, in IgaA's interaction with  
475 the downstream phosphorelay. We find that the point of interaction of IgaA is with the  
476 phosphotransfer protein RcsD, rather than with the RcsC histidine kinase. In fact, while RcsC  
477 function requires membrane association, the TM and periplasmic sequences of RcsC are not  
478 required (Fig. 5, S5B Fig). The change in the IgaA-RcsD interaction frees RcsC-generated  
479 phosphate to flow from RcsC to RcsD, and from there to RcsB, activating signaling downstream

*IgaA negatively regulates the Rcs Phosphorelay via contact with RcsD*

480 of RcsB. Deletion and mutation analysis of RcsD identified multiple regions important for IgaA-  
481 dependent regulation, separate from the regions critical for phosphorelay signal flow from RcsC  
482 to RcsD. These observations help to explain why RcsD includes not only an Hpt domain but also  
483 trans-membrane and signaling domains. We suggest that the use of RcsD as the direct target of  
484 IgaA has allowed the development of a poised signaling complex, without impinging on  
485 structures necessary for histidine kinase activity. In addition, this branched signaling pathway  
486 allows the possibility of other signals directly regulating RcsC activity.

487 **Multipartite interactions of RcsD and IgaA regulate signaling: anchors and switches**

488 Our analysis of the regions of RcsD and IgaA necessary for interaction and regulation  
489 suggest multiple points of contact between these proteins, each with different roles in  
490 regulation. The first contact is in the periplasmic loops of these two proteins. The periplasmic  
491 domain of RcsD (amino acids 45-304) is necessary but not sufficient for repression by IgaA; the  
492 periplasmic region of IgaA (aa 384-649) is similarly essential for IgaA function and drives the  
493 interaction of IgaA and RcsD in a bacterial two-hybrid assay (Fig 2B, Fig 4B). We assume that  
494 these periplasmic domains directly contact each other (Fig 6). Because others have  
495 demonstrated that overproduction of IgaA missing the periplasmic domain can support  
496 repression and allow depletion of wild-type IgaA [8], we suggest that this strong periplasmic  
497 interaction provides an anchor for interaction with RcsD, but likely not the region in which  
498 signal is sensed. Thus, the periplasmic contact can be bypassed by overproduction, but is  
499 critical for repression at normal levels of the interacting proteins.

500 The cytoplasmic PAS-like domain of RcsD is also necessary for regulation, interaction in  
501 the bacterial two-hybrid assay and interaction as judged by titration of IgaA (Fig 2B, Fig 3A). It

*IgaA negatively regulates the Rcs Phosphorelay via contact with RcsD*

502 seems likely that this cytoplasmic domain contacts one or both cytoplasmic loops of IgaA. Both  
503 cytoplasmic loop 1 and cytoplasmic loop 2 of IgaA are necessary for RcsD to function properly  
504 (Fig 4C), in agreement with previous work [8]. Because the bacterial two-hybrid interactions  
505 are primarily driven by the periplasmic domains (Fig 4B), the contacts of RcsD with the IgaA  
506 cytoplasmic loops are likely to be weaker. We do not currently have any direct evidence that  
507 cytoplasmic loop 2 is contacting RcsD, but certainly deletion of this loop, like deletion of the  
508 periplasmic region, abrogates repression (Fig 4C). We suggest that the interaction of  
509 cytoplasmic loop 1 and RcsD, in the region around T411, constitutes the regulatory switch for  
510 this system. Deletion of loop 1 is the least detrimental in terms of bacterial growth and  
511 signaling (Fig 4C), suggesting that the contacts outside cytoplasmic loop 1 are sufficient for  
512 enough IgaA repression of RcsD to support viability. Our model suggests that the additional  
513 repressive interaction in loop 1 is normally lost upon Rcs stimulus (in the presence of PMBN, for  
514 instance), and that the anchor contacts in the periplasm and with IgaA loop 2 ensure that  
515 signaling is never so high that the cell dies. In the T411A mutant, this stimulus-sensitive contact  
516 becomes stronger, so that the system becomes uninducible (Fig 4A). This can be seen in the  
517 bacterial two-hybrid assay as some restored interaction in the absence of the IgaA periplasmic  
518 region (Fig 4B).

519 In work by Collet and coworkers, overproduction of cytoplasmic loop 1 [8] was, by itself,  
520 capable of repressing an Rcs reporter to a similar extent to that seen with both cytoplasmic  
521 regions, further supporting a critical role for this region of Rcs.

522

523 **RcsD is an unusual phosphorelay protein**

*IgaA negatively regulates the Rcs Phosphorelay via contact with RcsD*

524           Phosphate flow in complex phosphorelays such as Rcs is from His (kinase domain) to Asp  
525 (response regulator domain of RcsC) to His (RcsD phosphotransfer protein) to Asp (RcsB  
526 response regulator domain). RcsD, is a large inner membrane protein with many additional  
527 domains; its domain organization suggests that duplication of an ancestral protein may have  
528 given rise to RcsC and RcsD. Our results suggest critical roles for these additional regions of  
529 RcsD.

530           Consistent with its role as an anchor for IgaA, alignments suggest significant regions of  
531 conservation within the periplasmic domain of RcsD, apparently more so than the similarly  
532 sized RcsC periplasmic domain, which we show here is not critical for signaling (Fig 5A, S6 Fig).  
533 There is significant conservation as well in the truncated PAS domain, but less conservation in  
534 the inactive HATPase domain than in the active parallel RcsC domains. Future work will be  
535 necessary to identify the periplasmic interaction points of RcsD with IgaA and to understand  
536 whether the RcsD ATPase domain plays any critical role in regulation.

537

538 **Alternative signaling pathways remain to be understood**

539           The complexity of the Rcs phosphorelay provides opportunities for signals to regulate  
540 RcsB activity independently of the RcsF-IgaA-RcsD interaction network. Some transcription  
541 factors interact directly with RcsB, independent of its phosphorylation, to make heterodimers  
542 that regulate specific sets of genes (reviewed in [1]). In addition, there is evidence for  
543 activation of RcsB-dependent genes, dependent upon RcsC and RcsD, but independent of RcsF.  
544 The two cases in which this has been reported involve overproduction of the DjlA DnaJ-like

*IgaA negatively regulates the Rcs Phosphorelay via contact with RcsD*

545 chaperone and mutation in the periplasmic disulfide bond formation protein, DsbA, possibly  
546 suggesting that alterations in protein folding may be the inducing event [1, 16, 28].

547         One other unexplored aspect of our work is the possible expression of low levels of the  
548 C-terminal domains of RcsD, to produce a short phosphotransfer protein that would not be  
549 subject to IgaA regulation. For instance, the modest activity of RcsD<sub>N-522</sub> and RcsD<sub>N-683</sub> in the  
550 *rcsD541* host (S3A Fig) was unexpected. Because this same increase was not seen when the  
551 host contained other *rcsD* alleles (*rcsD841\**, for instance), we suggest it may be due to low level  
552 expression of a C-terminal fragment of the chromosomal RcsD protein able to transfer  
553 phosphate from RcsC to RcsB. In other experiments, we found that unplanned stop codons  
554 were found in some plasmids expressing *rcsD* alanine scan mutants. These plasmids, rather  
555 than acting like nulls, had activity significantly above that of a null strain, again suggesting that  
556 they might be expressing a C-terminal fragment of RcsD. Whether this is ever made under wild-  
557 type physiologically relevant conditions remains to be determined but would provide the  
558 possibility of an IgaA-resistant signaling pathway.

559         Overall, while a critical step in the best understood signaling pathway is clarified here,  
560 there is still much to learn about Rcs, other modes of signaling to the phosphorelay, and exactly  
561 how the IgaA/RcsD interactions modulate phosphate movement from RcsC through RcsD to  
562 RcsB. Given the range of genes regulated by RcsB, and the importance of these genes for  
563 bacterial behavior, the options for multiple ways for the system to be regulated may not be  
564 surprising.

565

566 **Materials and Methods**

*IgaA negatively regulates the Rcs Phosphorelay via contact with RcsD*

## 567 **Bacterial growth conditions and strain construction**

568 Cells were grown in LB with appropriate antibiotics (ampicillin 100µg/mL, kanamycin 30-  
569 50µg/mL, chloramphenicol 10µg/mL for the *cat* cassette in *cat sacB* strains and 25µg/mL for  
570 others (*chl<sup>R</sup>*), tetracycline 25µg/mL, gentamicin 10µg/mL, zeocin 50µg/mL); 1% glucose was  
571 added in some cases to reduce basal level expression of P<sub>BAD</sub> and P<sub>Lac</sub> promoters. For  
572 fluorescence/growth assays, strains were grown in MOPS minimal glucose or minimal glycerol  
573 (Teknova). Strains were constructed via recombineering and/or P1 transduction with selectable  
574 markers, as outlined in S1 Table. Strains, plasmids, oligonucleotides and gBlocks used in this  
575 study are listed in S1-S3 Tables. Oligonucleotides and gBlocks were from IDT DNA, Coralville, IA.

576 For recombineering, cells carrying the chromosomal mini-λ Red system or the plasmid-  
577 borne Red system (pSIM27) were grown in LB, without or with Tetracycline respectively, at 32°C  
578 to an OD<sub>600</sub> of ~0.4-0.6. At mid-log, cultures were transferred to a water bath at 42°C to induce  
579 expression of the λ-Red system for 15 minutes and then immediately chilled in an ice-water  
580 slurry for 10 minutes prior to washing in sterile ice-cold water to make electrocompetent cells.  
581 100 ng of ss oligo DNA or dsDNA (PCR product or gBlock) were used in the electroporation; 1 ml  
582 of LB or SOC was added for recovery before plating on selective plates [29]. Truncations and  
583 point mutations were introduced in place of the wild-type chromosomal copies of genes,  
584 leaving no marker or scar, unless otherwise indicated, by first inserting the counter-selectable  
585 *ara-kan-kid* cassette from CAI\_91 and simultaneously deleting the gene of interest, and then  
586 replacing it with the desired allele, provided either as a PCR product or a gBlock. This cassette,  
587 a gift of C. Ranquet (BGene Genetics, Grenoble), expresses the Kid toxin under the control of an  
588 arabinose-inducible promoter. Cells carrying the *ara-kan-kid* counter-selectable marker



*IgaA negatively regulates the Rcs Phosphorelay via contact with RcsD*

589 cassette were grown with added 1% glucose in the media to repress. Counter-selection for  
590 removal of the *ara-kan-kid* cassette was done on LB-1% arabinose plates. All plasmid and  
591 chromosomal mutations were confirmed by sequencing using flanking primers.

592

593

594 **DNA and strain manipulation and mutagenesis**

595 Polymerase chain reactions were performed using Pfu Ultra II polymerase (Agilent) or  
596 Clontech Hifi polymerase (Takara). Primers used in this study are listed in S3 Table. PCR  
597 products were purified using column purification (Qiagen) according to the manufacturer's  
598 instructions. Gibson assemblies were performed using the Clontech In-Fusion HD Cloning Kit  
599 (Takara) and transformed into either Clontech Stellar Cells or NEB Turbo cells containing LacI<sup>q</sup>.

600 Alanine-scanning mutagenesis was carried out by SGI-DNA (San Diego, CA), using their  
601 BioXP system, on pBAD24-RcsD (pEAW11). We ordered single mutants targeted to conserved  
602 residues within the cytoplasmic region of RcsD, from residue 326-683. Plasmids were first  
603 transformed into Stellar *E. coli* (Clontech), extracted and retransformed into EAW19, screening  
604 for fluorescence on minimal glucose-ampicillin agar plates, in comparison to cells carrying  
605 pBAD-RcsD<sup>+</sup> or the empty pBAD vector. Out of 35 mutants screened, ten had fluorescence  
606 levels comparable to the pBAD-RcsD<sup>+</sup> control; six were further studied (S4A Fig). Another 17  
607 had higher fluorescence than either the pBAD vector or the pBAD-RcsD<sup>+</sup> control, but  
608 sequencing of these isolates showed that they had all contained, in addition to the designed  
609 mutation, additional unexpected stop codon mutations and were not further studied here.

610

*IgaA negatively regulates the Rcs Phosphorelay via contact with RcsD*

## 611 **Bacterial Adenylate Cyclase Two-Hybrid Assay**

612 In the bacterial adenylate cyclase two hybrid assay (BACTH), an adenylate cyclase  
613 mutant strain is used to assay for beta-galactosidase activity engendered when the T18 and T25  
614 portions of adenylate cyclase are reconstituted, allowing cAMP/CRP to activate the *lac* operon.  
615 On their own, T18 and T25 will not form adenylate cyclase efficiently unless they are fused to  
616 two interacting proteins [21]. Tags were C-terminal to avoid interference with protein insertion  
617 into the membrane.

618 The RcsD and RcsC fusion proteins were tested for determine if they were functional  
619 and thus presumably membrane-localized. Plasmids expressing RcsD-T25 and RcsC-T25 were  
620 introduced into strains containing deletions for those two genes; after transformation, the cells  
621 were transduced with P1 grown on a strain NM357, containing *igaA::chl<sup>R</sup>*, selecting for  
622 chloramphenicol resistance. In a strain deleted for *rscD* or *rscC*, the *igaA* deletion can be  
623 introduced by P1 transduction. However, the fusion plasmids blocked the ability of cells to be  
624 transduced with *igaA::chl<sup>R</sup>*, consistent with them complementing their respective deletions (S2E  
625 Fig).

626

## 627 ***igaA* co-transduction frequencies**

628 *bioH/igaA* co-transduction frequencies were used to determine which strains could  
629 support loss of IgaA. *bioH*, at 3544844 nt, is linked to *igaA* (position 3526469). The *bioH::kan<sup>R</sup>*  
630 mutant from the Keio collection [30] was introduced by P1 transduction into an *rscD541*  
631 *igaA::chl<sup>R</sup>* mutant (EAW17), selecting for kanamycin resistance and retention of  
632 chloramphenicol resistance (*igaA::chl<sup>R</sup>*), to create EAW66. Because *rscD* is inactive in this

*IgaA negatively regulates the Rcs Phosphorelay via contact with RcsD*

633 strain, it can tolerate loss of *igaA*. P1 transduction from this donor to recipient strains was  
634 carried out, selecting for Kanamycin Resistance and then screening 50-100 colonies for linkage  
635 to *igaA::chl<sup>R</sup>*. In *rscB*, *rscC* or *rscD* null recipients, the co-transduction frequency was 78%. In a  
636 wild-type strain, the linkage dropped to zero, consistent with the known lethality of an *igaA*  
637 deletion [3, 31] (S3H Fig).

638

639 **Fluorescence assays**

640 Fluorescence assays for Rcs activation were performed in 96 well plates in a Tecan Spark  
641 10m spectrophotometer. These strains carried a transcriptional fusion of mCherry, at the *ara*  
642 locus, to the promoter for sRNA RprA, as a reporter for Rcs pathway activation, referred to here  
643 as P<sub>rprA</sub>-mCherry. Fluorescence of cells was measured in MOPS glucose minimal media  
644 (Teknova) unless otherwise stated. The pBAD24 plasmid was used for overexpression of RcsD  
645 fragments in strains expressing *araE* constitutively to ensure homogenous arabinose uptake  
646 [32]. For cells expressing proteins from pBAD, overnight cultures in MOPS minimal glucose  
647 were washed with MOPS minimal glycerol to eliminate residual glucose, then diluted into fresh  
648 MOPS minimal glycerol media (.05% glucose, .5% glycerol) with 0.02% arabinose or 0.2%  
649 glucose as an uninduced control. Polymyxin B nonapeptide (PMBN; Sigma), a non-toxic  
650 polymyxin derivative, was used at 20 ug/mL to produce Rcs induction. To check for Rcs  
651 induction by other known compounds, A22, an MreB inhibitor was used at 5ug/mL, and  
652 mecillinam was used at 0.3ug/mL.

653 Each strain/condition combination was performed in technical triplicate on the plate,  
654 with biological replicates performed on different days. Optical density and mCherry

*IgaA negatively regulates the Rcs Phosphorelay via contact with RcsD*

655 fluorescence were monitored every fifteen minutes for seven hours. At the end of six hours,  
656 measurements of fluorescence at equivalent OD<sub>600</sub> values (0.4 +/- 0.03 after starting at OD<sub>600</sub>  
657 .03-.05) were converted to bar graphs of fold change of fluorescence with respect to the wild  
658 type strain. Some strains arrested growth early and never achieved 0.4 OD<sub>600</sub>, and the OD<sub>600</sub> at  
659 6 hours for those are noted on the graph. Six hours marks the time when the wild type strain  
660 begins to transition to stationary phase, and ODs become less interpretable due to cell  
661 aggregation in the well bottom.

662

663 **Acknowledgments**

664 We thank S. Buchanan and members of her laboratory for discussion throughout this  
665 work, as well as members of the LMB. Erin Wall was supported during much of this work by a  
666 PRAT Fi2 fellowship GM123943 from NIGMS. This research was supported in part by the  
667 Intramural Research Program of the NIH, National Cancer Institute, Center for Cancer Research.

668

669

670

*IgaA negatively regulates the Rcs Phosphorelay via contact with RcsD*

671 **REFERENCES**

- 672 1. Wall E, Majdalani N, Gottesman S. The Complex Rcs Regulatory Cascade. *Annu Rev Microbiol.*  
673 2018;72:111-39.
- 674 2. Guo XP, Sun Y-C. New insights in the non-orthodox two component Rcs Phosphorelay system.  
675 *Frontiers in Microbiology.* 2017;8. doi: 10.3389/fmicb.2017.02014.
- 676 3. Cho S-H, Szewczyk J, Pesavento C, Zietek M, Banzhaf M, Roszczenko P, et al. Detecting envelope  
677 stress by monitoring B-barrel assembly. *Cell.* 2014;159:1652-64.
- 678 4. Konovalova A, Mitchell AM, Silhavy TJ. A lipoprotein/b-barrel complex monitors  
679 lipopolysaccharide integrity transducing information across the outer membrane. *Elife.* 2016. doi:  
680 10.7554/eLife.15276. [
- 681 5. Konovalova A, Perlman DH, Cowles CE, Silhavy TJ. Transmembrane domain of surface-exposed  
682 outer membrane lipoprotein RcsF is threaded through the lumen of B-barrel proteins. *Proc Natl Acad Sci*  
683 *USA.* 2014;111:E4350–E8.
- 684 6. Laloux G, Collet J-F. Major Tom to Ground Control: How Lipoproteins Communicate  
685 Extracytoplasmic Stress to the Decision Center of the Cell. *Journal of Bacteriology.* 2017;199(21):1-13.  
686 doi: 10.1128/JB.
- 687 7. Asmar AT, Ferreira JL, Cohen EJ, Cho S-H, Beeby M, Hughes KT, et al. Communication across the  
688 bacterial cell envelope depends on the size of the periplasm. *PLoS Biology.* 2017. doi:  
689 doi.org/10.1371/journal.pbio.2004303.
- 690 8. Hussein NA, Cho S-H, Laloux G, Siam R, Collet J-F. Distinct domains of *Escherichia coli* IgaA  
691 connect envelope stress sensing and down-regulation of the Rcs phosphorelay across subcellular  
692 compartments. *PLoS Genet.* 2018;14:e1007398. doi: 10.1371/journal.pgen.1007398.
- 693 9. Majdalani N, Hernandez D, Gottesman S. Regulation and mode of action of the second small  
694 RNA activator of RpoS translation, RprA. *Mol Microbiol.* 2002;46(3):813-26.
- 695 10. Castanie-Cornet M-P, Cam K, Jacq A. RcsF is an outer membrane lipoprotein involved in the  
696 RcsCDB phosphorelay signaling pathway in *Escherichia coli*. *J Bacteriol.* 2006;188:4264-70.
- 697 11. Majdalani N, Heck M, Stout V, Gottesman S. Role of RcsF in Signaling to the Rcs Phosphorelay  
698 Pathway in *Escherichia coli*. *Journal of Bacteriology.* 2005;187(19):6770-8. doi: 10.1128/JB.187.19.6770–  
699 6778.2005.
- 700 12. Shiba Y, Miyagawa H, Nagahama H, Matsumoto K, Kondo D, Matsuoka S, et al. Exploring the  
701 relationship between lipoprotein mislocalization and activation of the Rcs signal transduction system in  
702 *Escherichia coli*. *Microbiology.* 2012;158(5):1238-48. doi: 10.1099/mic.0.056945-0.
- 703 13. Shiba Y, Matsumoto K, Hara H. DjlA negatively regulates the Rcs signal transduction system in  
704 *Escherichia coli*. *Genes Genet Syst.* 2006;81:51-6.
- 705 14. Ferrieres L, Thompson A, Clarke DJ. Elevated levels of sigma S inhibit biofilm formation in  
706 *Escherichia coli*: a role for the Rcs phosphorelay. *Microbiology.* 2009;155(Pt 11):3544-53. doi:  
707 10.1099/mic.0.032722-0. PubMed PMID: 19696107.
- 708 15. Fredericks CE, Shibata S, Aizawa S-I, Reimann SA, Wolfe AJ. Acetyl phosphate-sensitive  
709 regulation of flagellar biogenesis and capsular biosynthesis depends on the Rcs phosphorelay. *Molecular*  
710 *Microbiology.* 2006;61(3):734-47. doi: 10.1111/j.1365-2958.2006.05260.x.
- 711 16. Clarke DJ, Joyce SA, Toutain CM, Jacq A, Holland IB. Genetic analysis of the RcsC sensor kinase  
712 from *Escherichia coli* K-12. *J Bacteriol.* 2002;184:1204-8.
- 713 17. Krin E, Danchin A, Soutourina O. RcsB plays a central role in H-NS-dependent regulation of  
714 motility and acid stress resistance in *Escherichia coli*. *Res Microbiol.* 2010;161:363-71.
- 715 18. Pescaretti MdM, Farizano JV, Morero R, Delgado MA. A Novel Insight on Signal Transduction  
716 Mechanism of RcsCDB System in *Salmonella enterica* Serovar Typhimurium. *PLoS ONE.* 2013;8(9):1-10.  
717 doi: 10.1371/journal.pone.0072527.

*IgaA negatively regulates the Rcs Phosphorelay via contact with RcsD*

- 718 19. De Mets F, Van Melderen L, Gottesman S. Regulation of acetate metabolism and coordination  
719 with the TCA cycle via a processed small RNA. *Proc Natl Acad Sci USA*. 2019;116:1043-52.
- 720 20. Karimova G, Pidoux J, Ullmann A, Ladant D. A bacterial two-hybrid system based on a  
721 reconstituted signal transduction pathway. *Proc Natl Acad Sci USA*. 1998;95(10):5752-6. PubMed PMID:  
722 9576956.
- 723 21. Battesti A, Bouveret E. The bacterial two-hybrid system based on adenylate cyclase  
724 reconstitution in *Escherichia coli*. *Methods*. 2012;58(4):325-34. doi: 10.1016/j.ymeth.2012.07.018.
- 725 22. Zschiedrich C, Keidel V, Szurmant H. Molecular mechanisms of two-component signal  
726 transduction. *Journal of Molecular Biology*. 2016;428(19):3752-75.
- 727 23. Schmöe K, Rogov VV, Rogova NY, Löhr F, Güntert P, Bernhard F, et al. Structural insights into Rcs  
728 phosphotransfer: The newly identified RcsD-ABL domain enhances interaction with the response  
729 regulator RcsB. *Structure*. 2011;19(4):577-87. doi: 10.1016/j.str.2011.01.012.
- 730 24. Takeda S, Fujisawa Y, Matsubara M, Aiba H, Mizuno T. A novel feature of the multistep  
731 phosphorelay in *Escherichia coli*: a revised model of the RcsC-->YojN-->RcsB signalling pathway  
732 implicated in capsular synthesis and swarming behavior. *Mol Microbiol*. 2001;40:440-50.
- 733 25. Gao R, Stock AM. Biological insights from structures of two-component proteins. *Annu Rev*  
734 *Microbiol*. 2009;63:133-54.
- 735 26. Laubacher ME, Ades SE. The Rcs Phosphorelay Is a Cell Envelope Stress Response Activated by  
736 Peptidoglycan Stress and Contributes to Intrinsic Antibiotic Resistance. *Journal of Bacteriology*.  
737 2008;190(6):2065-74. doi: 10.1128/JB.01740-07.
- 738 27. Domínguez-Bernal G, Pucciarelli MG, Ramos-Morales F, García-Quintanilla M, Cano DA,  
739 Casadesús J, et al. Repression of the RcsC-YojN-RcsB phosphorelay by the IgaA protein is a requisite for  
740 *Salmonella* virulence. *Molecular Microbiology*. 2004;53(5):1437-49. doi: 10.1111/j.1365-  
741 2958.2004.04213.x.
- 742 28. Clarke DJ, Holland IB, Jacq A. Point mutations in the transmembrane domain of DjlA, a  
743 membrane-linked DnaJ-like protein, abolish its function in promoting colanic acid production via the Rcs  
744 signal transduction pathway. *Mol Microbiol*. 1997;25:933-44.
- 745 29. Yu D, Ellis HM, Lee EC, Jenkins NA, Copeland NG, Court DL. An efficient recombination system  
746 for chromosome engineering in *Escherichia coli*. *Proc Natl Acad Sci USA*. 2000;97(11):5978-83. PubMed  
747 PMID: 10811905.
- 748 30. Baba T, Ara T, Hasegawa M, Takai Y, Okumura Y, Baba M, et al. Construction of *Escherichia coli*  
749 K-12 in-frame, single-gene knockout mutants: the Keio collection. *Mol Syst Biol* [Internet]. 2006;  
750 2:[2006.0008 p.].
- 751 31. Cano DA, Domínguez-Bernal G, Tierrez A, Garcia-Del Portillo F, Casadesus J. Regulation of  
752 capsule synthesis and cell motility in *Salmonella enterica* by the essential gene *igaA*. *Genetics*.  
753 2002;162(4):1513-23. PubMed PMID: 12524328.
- 754 32. Khlebnikov A, Datsenko KA, Skaug T, Wanner BL, Keasling JD. Homogeneous expression of the  
755 P(BAD) promoter in *Escherichia coli* by constitutive expression of the low-affinity high-capacity AraE  
756 transporter. *Microbiology*. 2001;147(Pt 12):3241-7. doi: 10.1099/00221287-147-12-3241. PubMed  
757 PMID: 11739756.

758

759

*IgaA negatively regulates the Rcs Phosphorelay via contact with RcsD*

760 **Figure Legends:**

761 **Figure 1: Signaling via the Rcs Phosphorelay**

762 A. The six proteins of the Rcs Phosphorelay are shown schematically (not to scale;  
763 described in detail in [1]). RcsF is positioned in the outer membrane, associated with  
764 outer membrane porins (OMPs). Most described treatments that induce the  
765 phosphorelay require RcsF for activation and thus it is shown as a key sensor for both  
766 outer membrane stress (represented by a gold lightning bolt) and periplasmic or  
767 peptidoglycan stress (blue lightning bolt). IgaA is a five-pass inner membrane protein  
768 that serves as a brake on the phosphorelay; it communicates with RcsF across the  
769 periplasm. Current models suggest that, upon stress signaling, RcsF contacts or changes  
770 contacts with IgaA, leading to de-repression of the phosphorelay. RcsC is induced to  
771 autophosphorylate and pass phosphate from its active site His 479 to its REC domain  
772 Asp 875. The phosphate is then passed to His 842 on the RcsD histidine  
773 phosphotransfer domain, which then passes to the RcsB REC domain Asp 56.  
774 Phosphorylated RcsB both homodimerizes and heterodimerizes with RcsA to regulate  
775 many genes, notably repressing flagellar synthesis, inducing capsule synthesis, and  
776 inducing the sRNA RprA. The red highlight around *rprA* indicates that an *rprA* promoter  
777 fusion to mCherry ( $P_{rprA}$ -mCherry) is used throughout this work to evaluate activation of  
778 the phosphorelay. Note that as with many phosphorelays of this family, phosphate can  
779 also flow in reverse from RcsB towards RcsC. IgaA is shown closest to RcsD, as discussed  
780 in this paper.

*IgaA negatively regulates the Rcs Phosphorelay via contact with RcsD*

781 B. The promoter of the sRNA RprA was fused to mCherry to create a reporter for Rcs  
782 activation ( $P_{\text{rprA}}$ -mCherry), demonstrating sensitivity and a wide dynamic range. Activity of  
783 wild type cells (black, EAW8) was compared to  $\Delta\text{rcsC}::\text{Tn10}$  (blue, EAW18),  $\text{rcsD541}$  (green,  
784 EAW19),  $\Delta\text{rcsB}::\text{kan}$  (red, EAW31) and  $\Delta\text{rcsF}::\text{chl}$  (orange, EAW32). All strains were also  
785 tested with polymyxin B nonapeptide (PMBN) at 20ug/mL. Cells were grown in MOPs  
786 minimal glucose for the  $P_{\text{rprA}}$ -mCherry assay; signal at  $\text{OD}_{600}$  0.4 is shown. Details of the  
787 assay and cell growth are shown in S1A-C Fig and described in Materials and Methods.

788

789 **Figure 2: Interaction of IgaA with RcsD**

790 A. Relative beta galactosidase activity was measured in *cyaA* deficient cells (strain  
791 BTH101) containing a dual plasmid system encoding the T18 and T25 domains of adenylate  
792 cyclase. Each protein fusion plasmid paired with its cognate vector produces very little activity  
793 (gray bars). Error bars (some too small to be visible) represent standard deviation of three  
794 assays. Fusions present are IgaA-T25, RcsD-T18, and RcsC-T18. The opposite orientation, tests  
795 of roles of other Rcs members on the interaction, and Miller units are shown in S2A-D Fig.

796 B. Relative ratio of RcsD fragment binding to IgaA was determined by comparing the  
797 interaction of RcsD truncations to the interaction between full length RcsD and IgaA, set to 1. In  
798 most cases the IgaA/RcsD interaction is 20x over background, usually 1000 Miller units to 50  
799 Miller units for the background control. The dotted line at  $y=0.2$  represents the threshold for  
800 interaction detection, 4x over background signal. All measurements were taken in BTH101.  
801 Plasmids present were pEAW1 (IgaA-T18), pEAW8 (RcsD-T25), pEAW8b (RcsD<sub>683</sub>-T25), pEAW8 $\alpha$



*IgaA negatively regulates the Rcs Phosphorelay via contact with RcsD*

802 (RcsD<sub>522</sub>-T25), pEAW8m2 (RcsD<sub>462</sub>-T25), pEAW8m (RcsD<sub>383</sub>-T25), pEAW8peri (RcsD<sub>Δ45-304</sub>-T25),  
803 pEAW8s (RcsD<sub>326-C</sub>-T25).

804

805 **Figure 3: Activity of truncated RcsD proteins**

806 A. WT (EAW8) and *rcsD541* (EAW19) mutant cells carrying the P<sub>rprA</sub>-mCherry fusion were  
807 transformed with pBAD24-derived plasmids encoding RcsD or truncated pieces of RcsD,  
808 grown in MOPS glucose with ampicillin (-arabinose) or MOPS glycerol with ampicillin, with  
809 0.02% arabinose (+ arabinose). Fluorescence values for each strain are shown at OD<sub>600</sub> 0.4.  
810 RcsD truncations used are shown, with color-coding: black: V (vector, pBAD24); blue: RcsD  
811 (pEAW11); brown: RcsD<sub>N-383</sub> (pEAW11m); green: RcsD<sub>N-462</sub> (pEAW11m2). Fluorescence as a  
812 function of OD<sub>600</sub> and additional related plasmids in the same strains are shown in S3A Fig;  
813 results in other strain backgrounds are shown in S3B-C Fig.

814 B. Experiments as in panel A, in *rcsD*<sup>+</sup> (WT; EAW8) and *rcsD541* (EAW19) hosts. The constructs  
815 are color-coded as follows: black: vector (pBAD24), blue: full length RcsD (pEAW11), cyan:  
816 RcsD<sub>Δ45-304</sub> (pEAW11peri), green: RcsD<sub>326-C</sub> (pEAW11s), orange: RcsD<sub>686-C</sub> (pEAW11c), purple:  
817 RcsD<sub>792-C</sub> (pEAW11d). Note that for the *rcsD541* cells carrying RcsD<sub>Δ45-304</sub>, the value shown is  
818 at a low OD, the total achieved within 6 hours.

819

820 **Figure 4: An RcsD mutation that blocks Rcs induction by increasing IgaA interaction**

821 A. RcsDT411A does not respond to Rcs stimuli. Both wild type and *rcsDT411A* strains  
822 (EAW8 and EAW121) were treated with nothing (-), 20μg/mL polymyxin B nonapeptide (P<sub>20</sub>),

*IgaA negatively regulates the Rcs Phosphorelay via contact with RcsD*

823 5 $\mu$ g/mL MreB inhibitor A22 (A<sub>5</sub>) or 0.3 $\mu$ g/mL Mecillinam (M<sub>0.3</sub>). Both A22 and Mecillinam give a  
824 lower dynamic range of wild type signaling than PMBN.

825 B. RcsD “PAS” domain mutation T411A seems to confer tighter binding to an IgaA  
826 construct that is missing the periplasmic domain. IgaA schematic includes yellow  
827 transmembrane domains (TM), amino acid numbering, and loops labeled with their localization.  
828 BACTH results are shown as ratios relative to the wild type IgaA/RcsD interaction. Wild-type  
829 RcsD and RcsD T411A are comparable in binding IgaA constructs containing the main  
830 periplasmic loop; RcsD T411A interacts with IgaA deleted of its periplasmic loop at a detectable  
831 level, not seen with WT RcsD. Plasmids, background controls and fold above background values  
832 are shown in S4B Fig.

833 C: RcsD and RcsD T411A show different levels of Rcs dysregulation when introduced on  
834 plasmids into cells carrying the *rcsD541* mutation and chromosomal *igaA* deletions. The left  
835 plate contains (clockwise from top left quadrant) *rcsD541* with vector (EAW19 with pBAD24),  
836 EAW19 containing RcsD on a plasmid (pEAW11), *rcsD541* in a complete *igaA* deletion (EAW95)  
837 with vector, and EAW95 containing pEAW11. Evident in this panel is 1) a decrease in  
838 fluorescence when RcsD is complemented from EAW19 (evident on graphs in Fig 3A, 3B), 2)  
839 mucoidy in EAW95 when RcsD is complemented, with only slightly raised apparent  
840 fluorescence. Mucoidy scatters the mCherry fluorescence, making it appear lower than the  
841 actual output per cell. Right panel and inset: *igaA* deletions in the chromosome in an *rcsD541*  
842 background show mucoidy, signaling, and instability upon introduction of plasmids containing  
843 RcsD or RcsD T411A. The inset shows bright streaks within EAW95+pEAW11; this mucoid  
844 primary transformant spontaneously generates non-mucoid *rcs* mutants. Because many

*IgaA negatively regulates the Rcs Phosphorelay via contact with RcsD*

845 mutants are not nulls, and the loss of mucoidy increases the apparent fluorescence, these show  
846 up as more brightly fluorescent, even though their level of P<sub>rprA</sub>-mCherry signal is lower. On the  
847 right plate RcsD and RcsD T411A plasmids lead to high levels of mucoidy in either a strain  
848 carrying a full *igaA* deletion or a strain carrying a deletion of IgaA periplasmic loop (EAW95,  
849 EAW96). Cells carrying a deletion of cytoplasmic loop one (EAW98) and either the RcsD or RcsD  
850 T411A plasmids are highly fluorescent but not mucoid, suggesting a somewhat less critical role  
851 for this loop in mediating IgaA repression. Only deletion of IgaA cytoplasmic loop two deletion  
852 shows a significant difference dependent on the RcsD allele; lower levels of Rcs activation were  
853 seen (loss of mucoidy) in the presence of RcsDT411A (EAW97 with pEAW11T).

854

855 **Figure 5: The RcsC periplasmic region is unnecessary for polymyxin B nonapeptide (PMBN),**  
856 **A22, and mecillinam-induced signaling.** The top panel shows a schematic of RcsC with  
857 domains, topology and active site residues noted.

858 A. PMBN induction in various *rscC* mutations. Strains included are (L to R) EAW8, EAW31,  
859 EAW91, EAW92, EAW56, EAW70 and EAW85.

860 B. The effect of three Rcs stimulating drugs, PMBN, A22 and mecillinam (P<sub>20</sub>, A<sub>5</sub>, M<sub>0.3</sub>) on WT  
861 and RcsC<sub>Δ48-314</sub>. The RcsC periplasmic deletion strain has a lower basal level of signal than  
862 wild type but shows large increases in signal when exposed to Rcs-inducing drugs.

863

864 **Figure 6: Proposed interactions of IgaA and RcsD.**

865 Extensive interactions in the periplasm and in the cytoplasm are shown, consistent with  
866 genetic data indicating that signals pass from one compartment to the other via IgaA.

*IgaA negatively regulates the Rcs Phosphorelay via contact with RcsD*

867 Anchoring interactions in the periplasm drive the BACTH interaction signal, and are required for  
868 IgaA repression of signaling. Interaction of the IgaA cytoplasmic loop 1 (blue oval) and the  
869 “PAS” domain of RcsD are suggested to comprise the signaling interaction, tightened in  
870 *rcsDT411A*, an allele that blocks induction.  
871  
872

*IgaA negatively regulates the Rcs Phosphorelay via contact with RcsD*

873 **Supporting Information**

874

875 **S1 Fig. Measurement of Rcs activity by a fluorescent assay (relevant to Fig 1B)**

876 A) S1A-C use the same color code as Fig 1B, with strains and treatments listed in color code.

877 Growth curve of each strain +/- PMBN 20  $\mu\text{g}/\text{mL}$  as shown in Fig 1B. Dotted lines represent  
878 an  $\text{OD}_{600}$  of 0.4 and a 360 min (6 hour) time point, used as the standard measurements for  
879 fluorescent strains, unless stated otherwise. Demonstrated in A is that stationary phase  
880 doesn't begin for any strain until close to or after  $\text{OD}_{600}$  0.8 under plate reader growth  
881 conditions. Stationary phase always induces Rcs and can cause buildup of cells in well  
882 bottoms; therefore, measurements were not made past  $\text{OD}_{600}$  0.8. If a strain has a growth  
883 defect that does not allow it to reach  $\text{OD}_{600}$  0.4 before the 360 min time point, it is noted  
884 with its actual  $\text{OD}_{600}$  on the relevant bar graph legend in the figures.

885 B) Relative fluorescent units (RFU) as a function of  $\text{OD}_{600}$  for strains used in Fig 1B. The vertical  
886 dotted line represents the measurement point that is shown in the Fig 1B bar graph,  $\text{OD}_{600}$   
887 0.4. These traces demonstrate the overall differences in Rcs activation of each strain. One  
888 can note the effect of PMBN +/- on the slope of each line. For example, WT without PMBN  
889 (black) has a low slope throughout the graph, while WT +PMBN (gray) has a noticeably  
890 higher slope. This can be contrasted with the *rcsC* or *rcsD* mutants (blue and green  
891 respectively), which may have slight differences in RFU between treated and untreated  
892 conditions at each growth point, but this doesn't dramatically affect the overall slope of the  
893 trace, indicating that small fluorescence differences here do not represent activation of Rcs  
894 as a whole. In addition, when a strain stops growing (here referring to WT+PMBN gray line

*IgaA negatively regulates the Rcs Phosphorelay via contact with RcsD*

895 at OD<sub>600</sub> near 0.8) and the fluorescence continues to increase, the slope of the line becomes  
896 much sharper, and we avoid using measurements in this range due to stationary phase Rcs  
897 activation of the *rprA* promoter, which must be distinguished from stimulus or drug-induced  
898 activation.

899 C) This graph is a “zoomed in” version of S1B Fig with only WT, *rcsF*<sup>-</sup> and *rcsB*<sup>-</sup> strains, and  
900 demonstrates that the point of divergence between the treated and untreated lines can be  
901 another interesting proxy for detecting Rcs activation. True Rcs activation occurs in early  
902 growth points and is consistent over the growth of the strain (see WT). This is the case for  
903 an *rcsF* mutant (orange) which has a lower basal level of signal, but the PMBN treated  
904 condition demonstrates a consistently higher slope, with no trace overlap after OD<sub>600</sub> of  
905 about 0.1. *rcsB* deletion (red) gives a low slope with no reaction to PMBN, showing almost  
906 complete trace overlap.

907 D) Four different chromosomal *rcsD* mutants were examined and were found to have different  
908 effects on P<sub>rprA</sub>::mCherry activity. Strains shown here include WT (EAW8), *rcsD543* (EAW9),  
909 *rcsD541* (EAW19), *rcsD H842A* (active site Hpt domain mutant, EAW57) and *rcsD841\** (two  
910 stop codons replace codons 842 and 843; EAW120). These alleles are also depicted in the  
911 gene schematics. *rcsD543* contains a non-polar Kanamycin resistance cassette that is  
912 transcribed in the opposite direction to *rcsD*; the Kan cassette deletes everything from the  
913 RBS to 540bp inside the *rcsD* ORF. Our most commonly used mutant, *rcsD541*, is a  
914 markerless deletion that results from Flp recombinase removal of the Kan cassette from a  
915 different construct, but it has the exact same deletion boundaries as *rcsD543*, with a *frt* scar  
916 and no reverse promoter. *rcsD841\** was expected to make a truncated protein, but in a

*IgaA negatively regulates the Rcs Phosphorelay via contact with RcsD*

917 Western blot is found to have no identifiable protein in the correct size range (S1E Fig). We  
918 have concluded that *rcsD841\** is probably a true RcsD null; the difference in expression with  
919 *rcsD541* is intriguing but unexplained. *rcsD* H842A produces protein of the correct size, yet  
920 has the same level of  $P_{rprA}$ -mCherry activation as deletion alleles 543 and 841\*. None of  
921 these alleles appear to be polar on RcsB levels (S1E, right panel).

922 E) Left blot: This polyclonal RcsD antibody can detect full length protein, but also detects a  
923 nonspecific band only slightly lower in molecular weight. 1) Wild type (EAW8), 2) complete  
924 deletion of RcsD ORF with the  $kan^R$  AraC Kid cassette (EAW52). Right blot: Parallel detection  
925 of RcsD and RcsB to check RcsD alleles for RcsB polarity. Underlined constructs produce  
926 RcsD at expected molecular weight. 1) WT (EAW8), 2) *rcsD543* (EAW9), 3) *rcsD541* (EAW19),  
927 4) RcsD H842A (EAW57), 5) *rcsD841\** (EAW120), 6) RcsD T411A (EAW121).

928 F) An *ackA* mutant accumulates higher levels of acetyl phosphate, leading to phosphorylation  
929 of RcsB and thus activity of the  $P_{rprA}$ -mCherry reporter. This increase is modest (two-fold) in  
930 a strain wild-type for the Rcs phosphorelay (WT; black and gray bars). The significantly  
931 higher activity in the *rcsC* and *rcsD* mutants is interpreted as a defect in dephosphorylation  
932 of RcsB~P. Thus, *rcsD541*, 841\* and H842A (blue (EAW123), purple (EAW131) and green  
933 (EAW124) bars) all lose the ability to dephosphorylate RcsB, easily evident in an *ackA*  
934 background. Although also unable to fully dephosphorylate RcsB~P, a markerless whole-  
935 ORF *rcsC* deletion (EAW128; no RcsC receiver domain) and *rcsC* H479A (EAW129; intact  
936 RcsC receiver domain) appear to differ in their ability to perform the phosphatase reaction,  
937 consistent with existing literature about the primacy of receiver domains in the  
938 dephosphorylation reaction [16]. All *ackA* mutants have a slight growth defect (right panel);

*IgaA negatively regulates the Rcs Phosphorelay via contact with RcsD*

939 *rcsD841*\* is the most defective. For this strain, the sample was taken at OD<sub>600</sub> 0.24, possibly  
940 leading to an underestimate of its activity.

941

942 **S2 Fig. Interaction of IgaA and RcsD in a Bacterial Two-Hybrid Assay (relevant to Figure 2)**

943 A) IgaA and RcsD interact well regardless of which tag is used on each. The interaction registers  
944 at least 1000 Miller units, while vector control experiments yield only 50, giving a 20-fold  
945 signal to noise ratio, used in most graphs. Plasmids used: pEAW1 (IgaA-T18), pEAW2 (IgaA-  
946 T25), pEAW7 (RcsD-T25), pEAW8 (RcsD-T18). All error bars throughout the figures  
947 represent standard deviation.

948 B) IgaA and RcsD interact approximately 20-fold over control empty vectors, regardless of  
949 strain background. IgaA/RcsC interaction is below the limit of detection in all strains tested.  
950 Empty vector controls were performed in the WT background (BTH101), *rcsB*::Tn10 (EAW1),  
951 and *rcsC*::Tn10 (EAW2).

952 C) Results from S2B merged with results from different experiments done in the *rcsF*<sup>-</sup> (EAW4)  
953 and *rcsD*<sup>-</sup> (EAW12) backgrounds. Each bar represents the relative IgaA/RcsD interaction  
954 measurement in the respective mutant host relative to the IgaA/RcsD interaction in wild  
955 type cells; this positive control is present for normalization in every assay of RcsD or IgaA  
956 variant interaction.

957 D) RcsC interaction with IgaA cannot be reliably detected irrespective of tag orientation or  
958 strain background. IgaA/RcsC were fused in both orientations and tested in WT (BTH101)  
959 and *rcsD541* (EAW12) host backgrounds. The dotted line at 200 Miller units represents



*IgaA negatively regulates the Rcs Phosphorelay via contact with RcsD*

960 approximately 4-fold over the background controls, the standard for a consistent,  
961 repeatable interaction determination. Note difference in beta-galactosidase values for even  
962 the strongest interaction here (150 Miller units) compared to the interaction of RcsD with  
963 IgaA (S2A Fig). Plasmids used: pEAW1 (IgaA-T18), pEAW6 (RcsC-T25), pEAW2 (IgaA-T25),  
964 and pEAW5 (RcsC-T18). V: vector, pUT18 for the T18 vector and pKNT25 for T25 vector.

965 E) RcsD-T25 and RcsC-T25 fusions are functional, as judged by complementation of  
966 chromosomal mutations for lethality in the absence of IgaA. When the *rscC* strain EAW91  
967 and *rscD541* strain EAW19 containing empty vector are transduced with a chloramphenicol  
968 resistant *igaA* deletion allele from NM357 (*igaA::Chl*), many colonies result (left plate in  
969 each pair), because IgaA is only essential when the Rcs system is able to actively signal.  
970 When these strains contain RcsC-T25 (pEAW6) or RcsD-T25 (pEAW8) respectively, the Rcs  
971 signaling cascade is restored and deletion of *igaA* is no longer possible (right plate in each  
972 pair), demonstrating functionality of the RcsC-T25 and RcsD-T25 constructs. Rare colonies  
973 that do result on these plates are mucoid and/or mutant.

974 F) Western blot of T18 fusion proteins, using the T18 antibody in a *cyo+* strain (NEB Turbo),  
975 regardless of whether the proteins form detectable interactions. Red arrows show the  
976 expected fusion proteins in blots with multiple bands. Plasmids present are pEAW7 (RcsD-  
977 T18), pEAW7b (RcsD<sub>N-683</sub>-T18), pEAW1 (IgaA-T18), pEAW1cyt1 (IgaA<sub>Δ36-181</sub>-T18), pEAW1cyt2  
978 (IgaA<sub>Δ263-330</sub>-T18), pEAW1peri (IgaA<sub>Δ384-649</sub>-T18), pEAW5 (RcsC-T18), pEAW5H (RcsC<sub>H479A</sub>-  
979 T18), pEAW5s (RcsC<sub>326-C</sub>-T18), pEAW7m (RcsD<sub>N-383</sub>-T18).

980 G) RcsD522 is not deficient in binding IgaA due to interaction with chromosomal RcsD. Here  
981 the interaction of FL RcsD with IgaA and the interaction of RcsD<sub>N-522</sub> with IgaA was

*IgaA negatively regulates the Rcs Phosphorelay via contact with RcsD*

982 unaffected by mutation of *rcsD* (compare left, WT, to right, *rcsD541* strain background). NB:  
983 the signal for IgaA/RcsD interaction was 50-fold above background here, as opposed to 20-  
984 fold (only one background control is shown for brevity; as in previous figures, background  
985 controls do not vary significantly from one another). Present are pEAW1 (IgaA-T18), pEAW8  
986 (RcsD-T25), and pEAW8alpha (RcsD<sub>N-522</sub>-T25) in hosts BTH101 (WT) and EAW12 (*rcsD451*).

987

988 **S3 Figure: Analysis of RcsD function in signaling.**

989 **A.** As for Fig 3A, with additional plasmids. RcsD C-terminal truncation constructs were  
990 expressed from arabinose-inducible plasmids in a WT (EAW8) and a *rcsD541* (EAW19) host. The  
991 graphs of strain fluorescence as a function of OD<sub>600</sub> for cells grown with arabinose are also  
992 presented below their respective bar graphs. Constructs are color-coded: black: V, (pBAD24);  
993 blue: RcsD<sup>+</sup>, (pEAW11); green: RcsD<sub>N-462</sub> (pEAW11m2); orange: RcsD<sub>N-522</sub> (pEAW11α); red:  
994 RcsD<sub>N-683</sub> (pEAW11b). Note that a change in slope on the fluorescence/ OD<sub>600</sub> graph  
995 demonstrates some level of P<sub>rprA</sub>-mCherry activation, and that the orange (RcsD<sub>N-522</sub>) and red  
996 (RcsD<sub>N-683</sub>) slopes are very different than other slopes in the *rcsD541* strain. Cell lysis can be  
997 seen as a reduction in OD<sub>600</sub> resulting in a leftward shift in the line (see orange and green lines  
998 in *rcsD541* host). Note that, in spite of lysis for RcsD<sub>N-462</sub> in *rcsD541*, greater fluorescence did  
999 not result, compared to the vector control in the same time period. Therefore, lysis does not  
1000 automatically increase P<sub>rprA</sub>-mCherry fluorescence. Highest RFU with vector shown by  
1001 horizontal dotted line, for comparison with experimental curves.

1002 **B.** Activity of plasmids in different *rcsD* mutants.

*IgaA negatively regulates the Rcs Phosphorelay via contact with RcsD*

1003 Based on the unexpected signal from plasmids lacking the Hpt domain in *rcsD541* (S3A Fig),  
1004 further *rcsD* alleles were tested with RcsD C-terminal truncation plasmids. Fluorescence as a  
1005 function of OD<sub>600</sub> is shown for cells grown as in S3A Fig, but in strains carrying four different  
1006 chromosomal *rcsD* alleles, *rcsD541* (EAW19, repeated from S3A Fig), *rcsD543* (EAW9),  
1007 *rcsDH842A* (EAW57) and *rcsD841\** (two stop codons at residue 841, EAW120). Each *rcsD* allele  
1008 is shown as an inset above the Fluorescence/ OD<sub>600</sub> trace for that strain. Plasmids are color-  
1009 coded as in S3A Fig. RcsD<sub>N-522</sub> and RcsD<sub>N-683</sub> in the *rcsD541* and *rcsD543* strains achieve higher  
1010 slopes and/or final RFU values than the vector control. Highest RFU with vector shown by  
1011 horizontal dotted line, for comparison with experimental curves. The same is not true in  
1012 backgrounds containing a disrupted Hpt domain. How activation is occurring in *rcsD541* and  
1013 *rcsD543* is unexplained, but it apparently requires the presence of the RcsD Hpt domain in the  
1014 chromosome.

1015 **C. Overexpression of RcsD C-terminal truncations cannot activate in the absence of RcsB,**  
1016 demonstrating that their effect on P<sub>*rprA*</sub>-mCherry is Rcs pathway specific. Assays and color-  
1017 coding are as in S3A Fig, but in an *rcsB::kan* strain (EAW31). Shown here (L to R) are a bar graph  
1018 with *rcsB* RFU compared to WT, a bar graph (OD<sub>600</sub> 0.4 or final OD<sub>600</sub> value at 6 hours) where  
1019 the RFU values for each construct can be easily visualized and compared, and a graph of relative  
1020 fluorescence units as a function of OD<sub>600</sub>. There are no significant differences in slope or final  
1021 RFU value, and the RFU values are the same as the background levels of P<sub>*rprA*</sub>-mCherry  
1022 expression in an *rcsB* deletion.

*IgaA negatively regulates the Rcs Phosphorelay via contact with RcsD*

1023 **D.** Overexpression of RcsD constructs containing the Hpt domain depend on RcsC for highly  
1024 unregulated activation and mucoidy. In the left bar graph, RcsD on a plasmid is compared to  
1025 empty vector in WT,  $\Delta rcsC$  (EAW91) and  $\Delta rcsC rcsD541$  (EAW93) strains. Although signal  
1026 increases in both *rcsC* deletion backgrounds, there is no mucoidy in these strains. The  
1027 threshold for mucoidy is closer to twelve-fold over wildtype; these strains approach seven-fold.  
1028 In the right bar graph color-coding is as in Fig 3B, but all plasmids are in strain EAW93. RcsC is  
1029 necessary for mucoidy, but apparently not for smaller signal increases.

1030 **E, F.** Strains (E.: EAW8, WT; F: EAW19, *rcsD541*) containing the indicated RcsD plasmids were  
1031 grown and assayed under four conditions: without arabinose or PMBN, with arabinose (.02%),  
1032 with PMBN, and with arabinose and PMBN.

1033 **G.** *rcsD* alleles were introduced into the chromosomal *rcsD* locus to create: *rcsD*<sub>326-C</sub> (EAW53),  
1034 *rcsD* <sub>$\Delta$ 48-304</sub> (EAW106) and *rcsD*<sub>686-C</sub> (EAW108). *rcsD*<sub>792-C</sub> could not be introduced without deleting  
1035 promoters for RcsB, so that construct was not made. These alleles performed as their plasmid  
1036 counterparts did, with the longer constructs roughly equivalent in their high signal and slow  
1037 growth and the *rcsD*<sub>686-C</sub> allele appearing less efficient at passing signal to RcsB. None of these  
1038 alleles respond to PMBN, but only the *rcsD*<sub>686-C</sub> allele can tolerate an *igaA* deletion (S3H Fig).

1039 **H.** Co-transduction of *igaA::chl<sup>R</sup>* with *bioH::kan* as an assay of Rcs function. Schematic shows  
1040 *igaA::chl<sup>R</sup>* cotransduction frequency experiment using linked *bioH::kan*. The *bioH::kan*  
1041 *igaA::chl<sup>R</sup>* donor (EAW66) was constructed in an *rcsD* mutant. Table lists frequency of *igaA::chl<sup>R</sup>*  
1042 cotransduction into various *rcs* mutants, all isogenic derivatives of the Rcs<sup>+</sup> strain EAW8, noting  
1043 the phenotype of transductants.

*IgaA negatively regulates the Rcs Phosphorelay via contact with RcsD*

1044

1045 **Fig. S4: Mutation in RcsD cytoplasmic region blocks signaling**

1046 A. Strain EAW19 (*rcsD541*) with derivatives of pBAD24-RcsD (pEAW11) grown in MOPS glucose  
1047 or MOPS glucose with PMBN, grown without arabinose and assayed as in S3E, F Fig.

1048 *rcsD541* has a higher signal than wild type, and can be complemented with WT RcsD on a  
1049 plasmid (compare lanes 1 and 3). The RcsD<sup>+</sup> construct responds to PMBN, unlike empty  
1050 vector (compare lanes 1 to 2 and 3 to 4). Plasmids encoding *rcsD* alanine mutations in the  
1051 cytoplasmic domains were screened for those that complemented *rcsD541*, reducing the  
1052 basal level of expression; these were then assayed with and without PMBN. Of the 5 alleles  
1053 shown here, 4 were inducible with PMBN. However, although it complements an *rcsD*  
1054 deletion by lowering signal, the point mutant *rcsDT411A* did not respond to PMBN.

1055 B. BACTH IgaA loop deletion interactions with RcsD WT vs RcsD T411A, as in Fig 4B, but  
1056 showing the various controls. The IgaA+RcsD constructs give signal greater than thirty-fold  
1057 over the single construct (background) controls. T18 derivatives carrying IgaA cytoplasmic  
1058 loop one deletion ( $\Delta$ 36-181, cyt loop 1; pEAW1cyt1), IgaA cytoplasmic loop two deletion ( $\Delta$   
1059 263-330, cyt loop 2; pEAW1cyt2), IgaA periplasmic loop deletion ( $\Delta$  384-649, peri;  
1060 pEAW1peri) were tested with RcsD-T25 WT (pEAW8) or RcsD T411A (pEAW8T) were tested  
1061 in BTH101.

1062 C. Schematic showing point mutations surrounding IgaA L643P, a mutant of IgaA defective in  
1063 Rcs negative regulation. In a western blot, the level of the T18-IgaA fusion protein is similar

*IgaA negatively regulates the Rcs Phosphorelay via contact with RcsD*

1064 for L643P and wild type IgaA, indicating stability. EF-Tu was used as a loading control.

1065 Plasmids present: pEAW1, pEAW1L.

1066 D. Wild type IgaA interaction with RcsD in the BACTH system is set to one, and compared to

1067 IgaA point mutant interactions with RcsD. IgaA L643P is deficient, but L643A is significantly

1068 better and surrounding mutants are nearly WT for RcsD interaction. Plasmids tested (L to

1069 R): pEAW1, pEAW8, pEAW1L, pEAW1LA, pEAW1D, pEAW1N, pEAW1H.

1070 E. When inserted into the chromosome in place of the wild-type *igaA* gene, only IgaA L643P

1071 produces Rcs dysregulation; the other mutants are wild-type for Rcs negative regulation and

1072 response to PMBN. Strains present (L to R): EAW8, EAW111, EAW112, EAW109, EAW110,

1073 EAW113.

1074

1075 **S5 Figure: The RcsC periplasmic loop is dispensable for signaling**

1076 S5A: Bacterial two-hybrid assay of interaction of cytoplasmic portion of RcsC with regions of

1077 RcsD. Plasmids present include (L to R) pEAW5s, pEAW8, pEAW8 $\alpha$ , pEAW8b, pEAW8s.

1078 S5B: RcsC periplasmic deletions perform differently when exposed to PMBN depending on the

1079 linker length between transmembrane domains and the identity of those transmembrane

1080 domains. Strains present include (L to R) EAW8, EAW31, EAW61, EAW69, EAW70, EAW71,

1081 EAW72.

1082 **S6 Figure: Conservation in RcsC and RcsD**

*IgaA negatively regulates the Rcs Phosphorelay via contact with RcsD*

1083        A. Amino acid logo diagram for RcsC, created by aligning 77 RcsC proteins from different  
1084            bacterial species within Enterobacterales. Conservation is high in the enzymatic regions  
1085            (HisKA, HATPase, and REC domains), but is relatively low in the periplasmic region,  
1086            found here to be dispensable for function and signaling.

1087        B. Amino acid logo for RcsD, created by aligning 83 RcsD proteins from different bacterial  
1088            species within Enterobacterales. Conservation is not high in the ancestral histidine kinas  
1089            and ATPase regions, but is high in the periplasmic domain. Alignments and logos were  
1090            created in Geneious using MUSCLE.

1091

1092    Supplemental Tables:

1093    S1 Table: Strains used in this study.

1094    S2 Table: Plasmids used in this study.

1095    S3 Table: Primers used in this study.

1096

1097

1098

Figure 1A

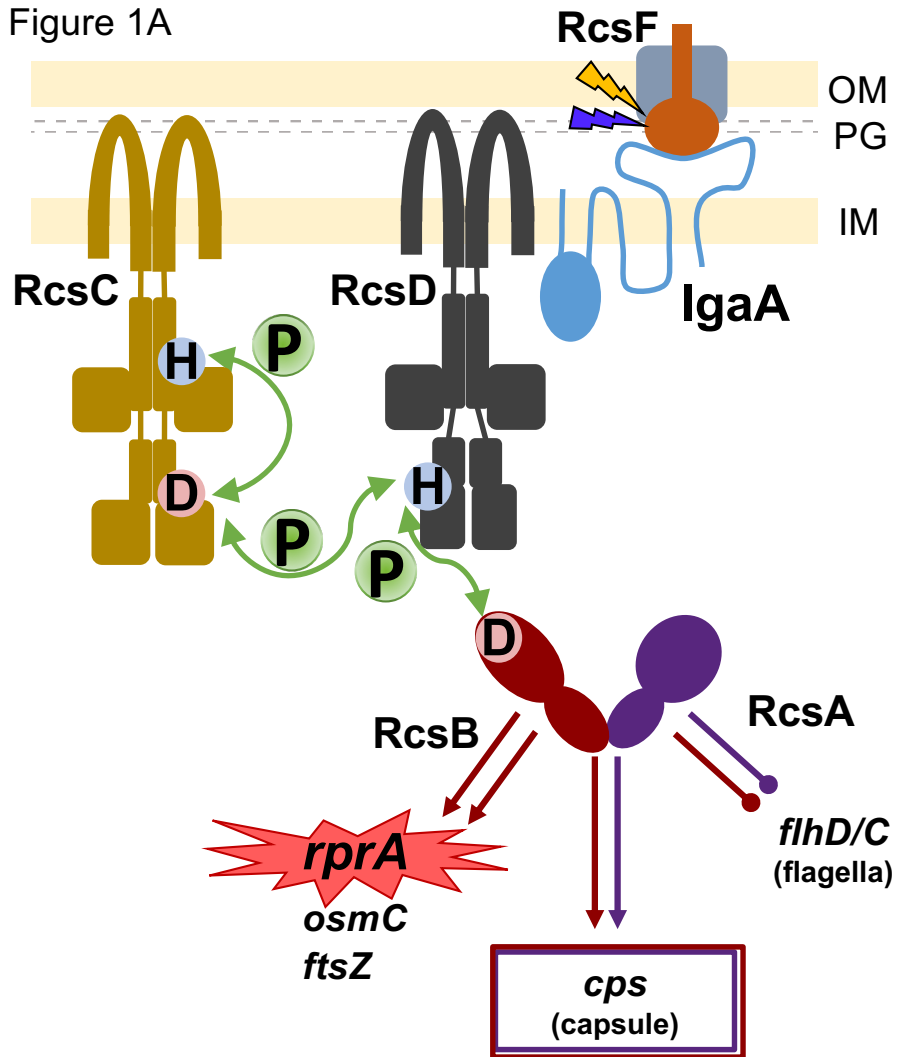



Figure 1B

$P_{rprA}$ -mCherry fluorescence

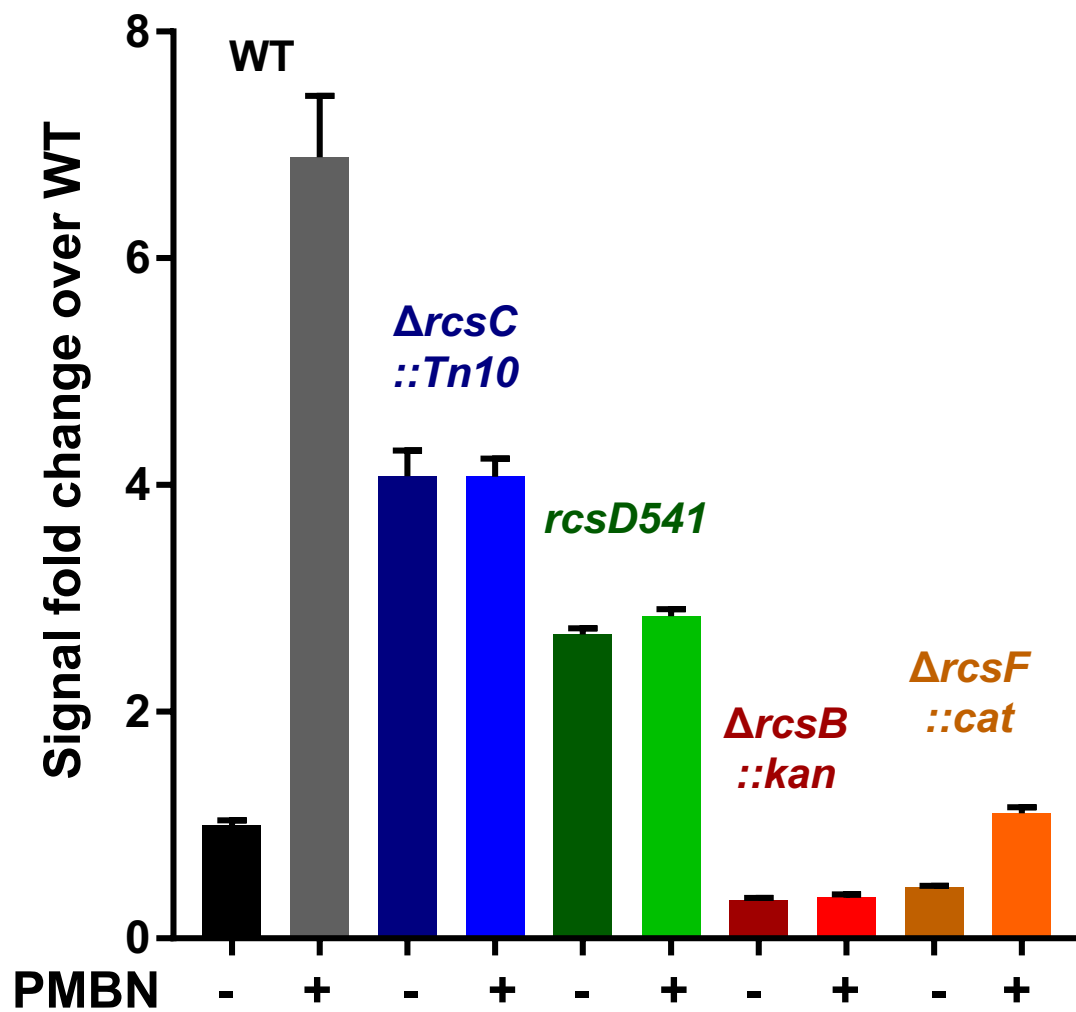

Figure 2A

Reconstitution of adenylate cyclase  
measured by beta-galactosidase activity

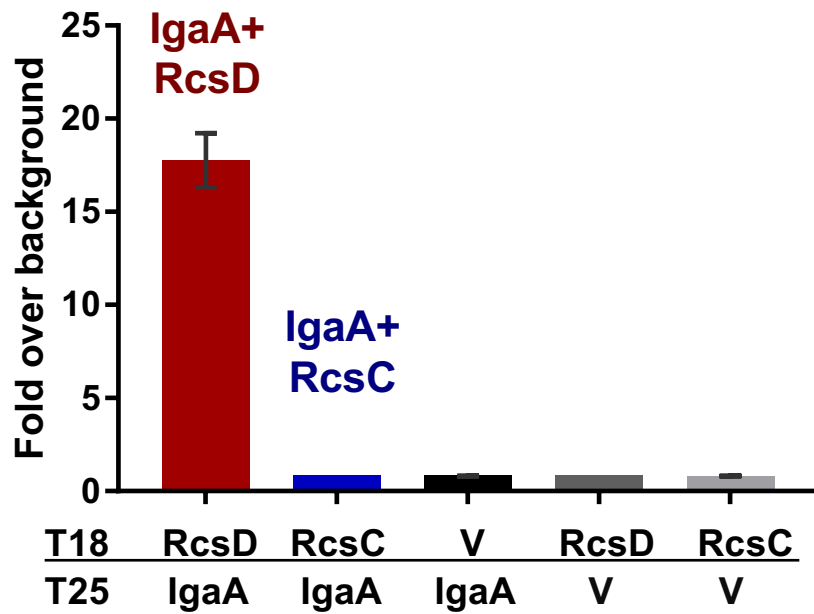

2B

RcsD fragments

Relative IgaA Binding

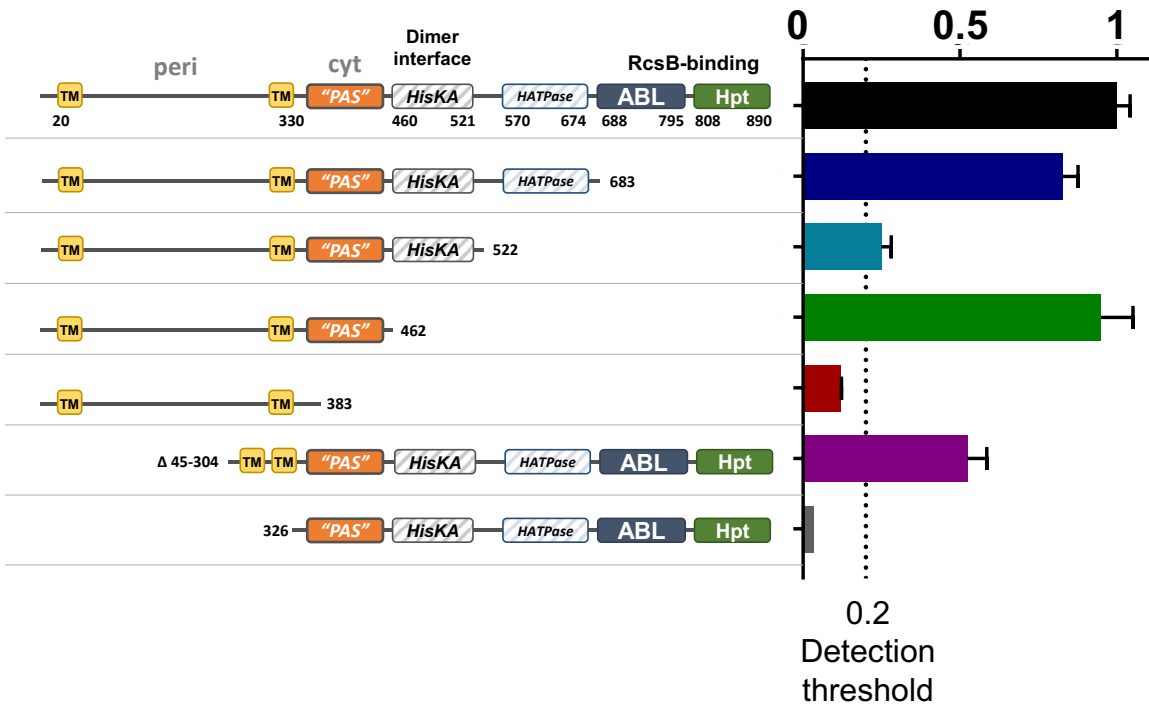

### 3A

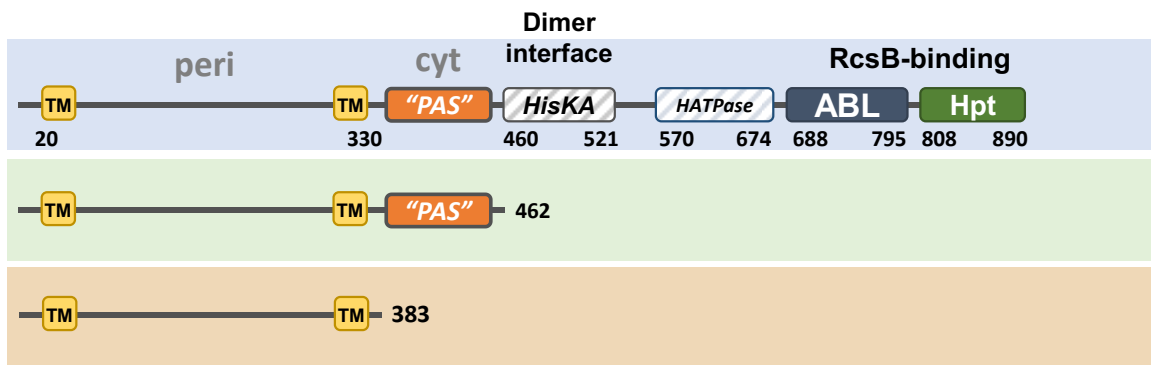

Rcs Wild Type

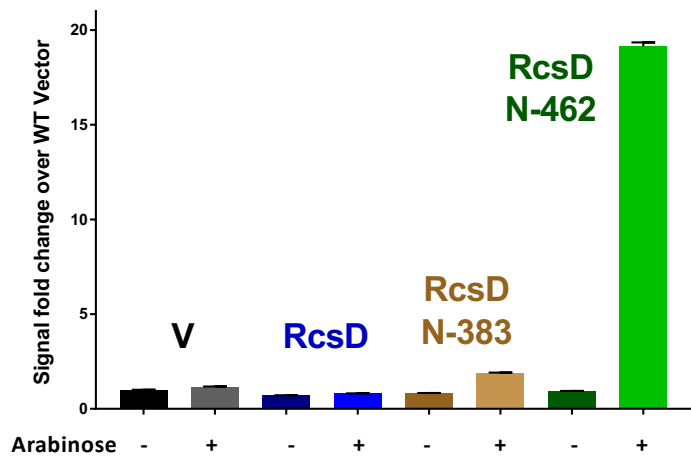

*rcsD541*

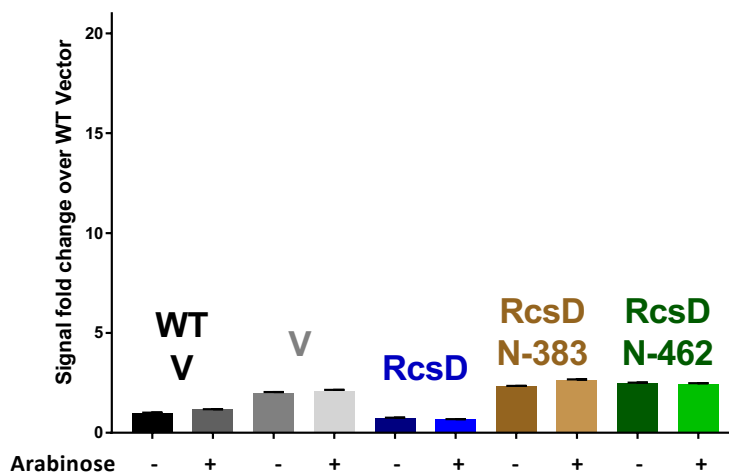

3B

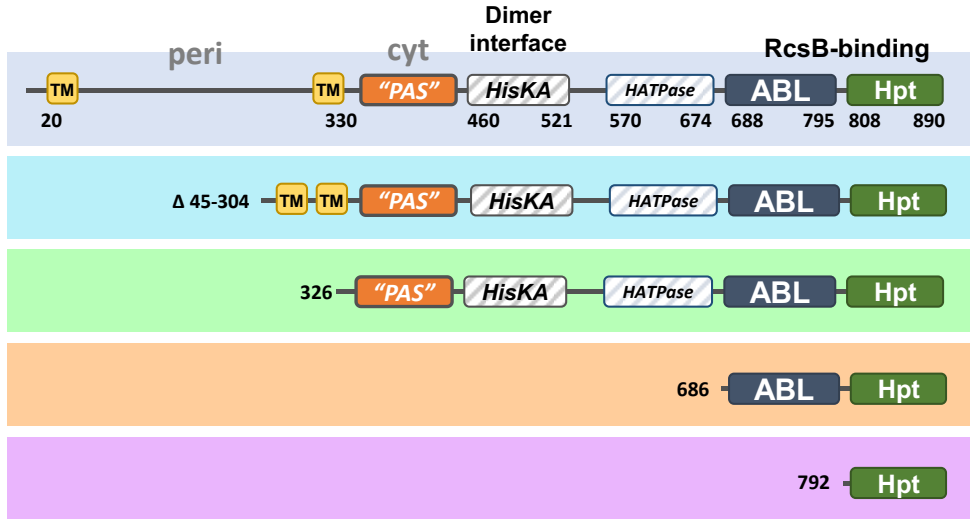

Rcs Wild Type

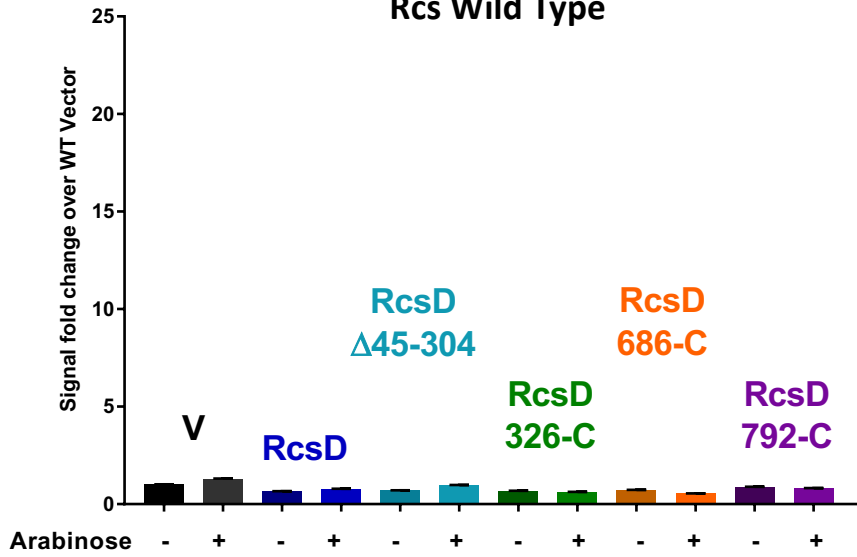

*rcsD541*

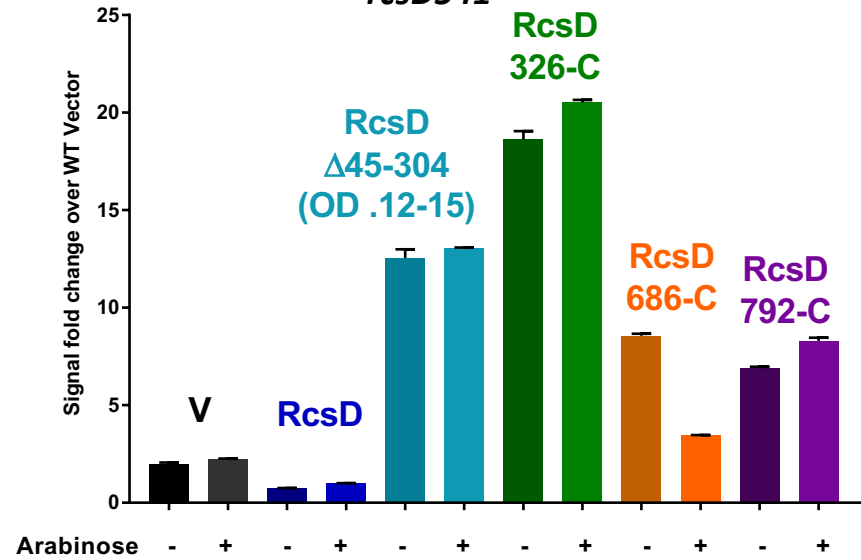

4A

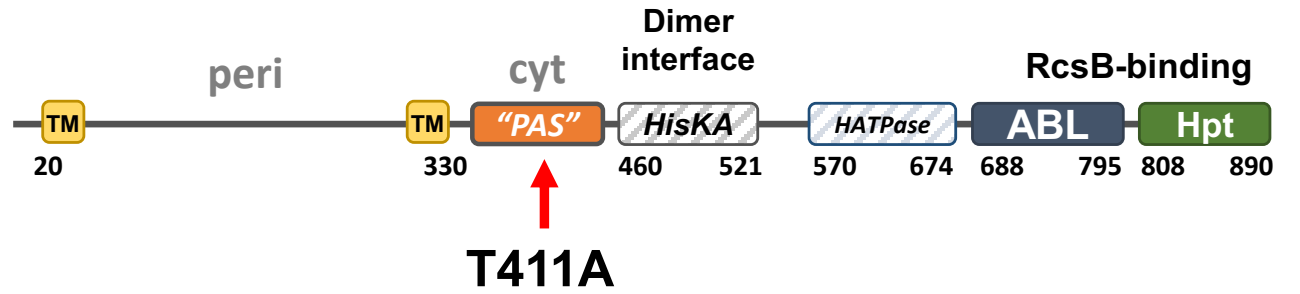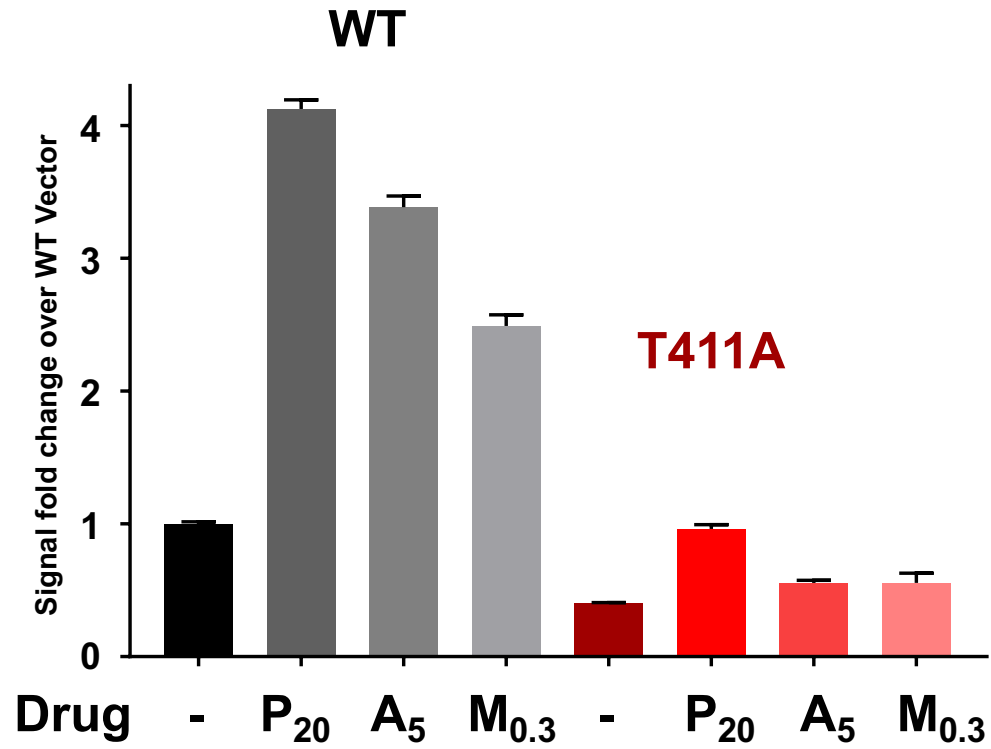

4B

IgaA

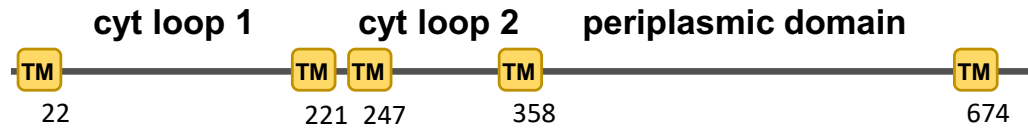

Relative binding compared to IgaA/RcsD in bacterial two hybrid

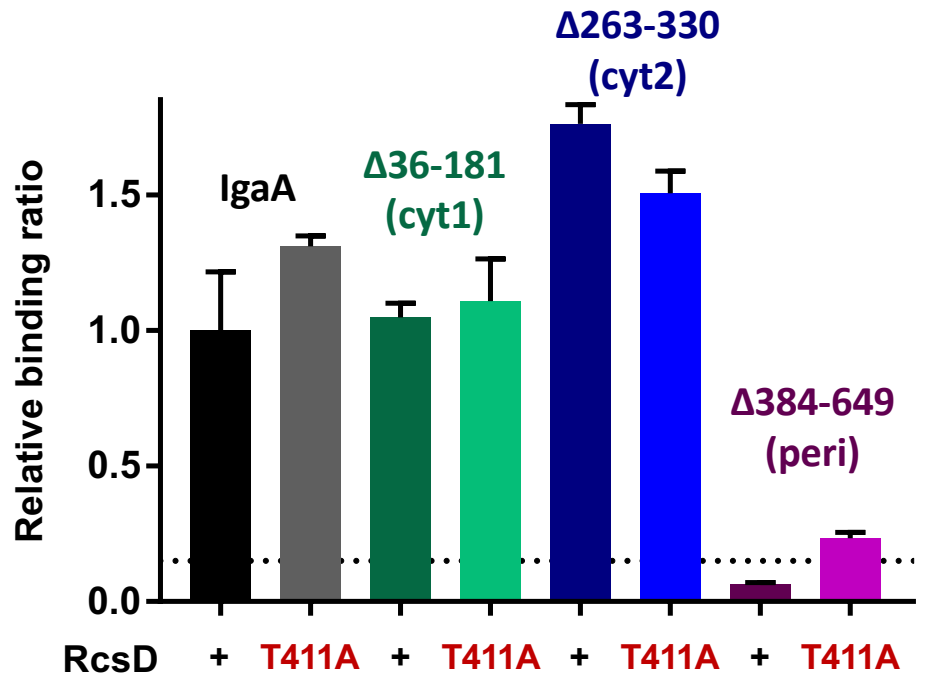

4C

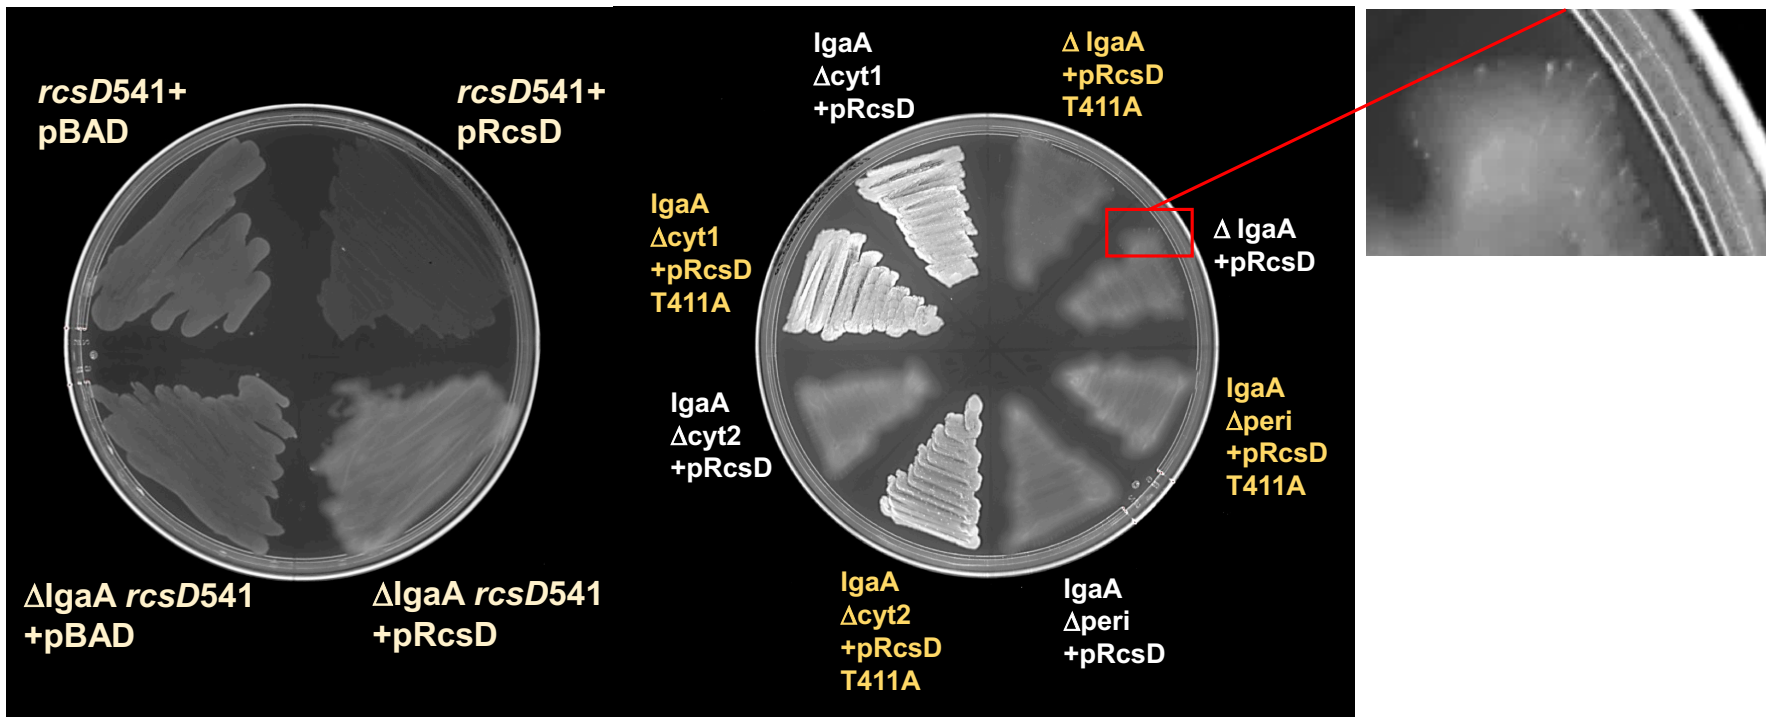



Figure 5

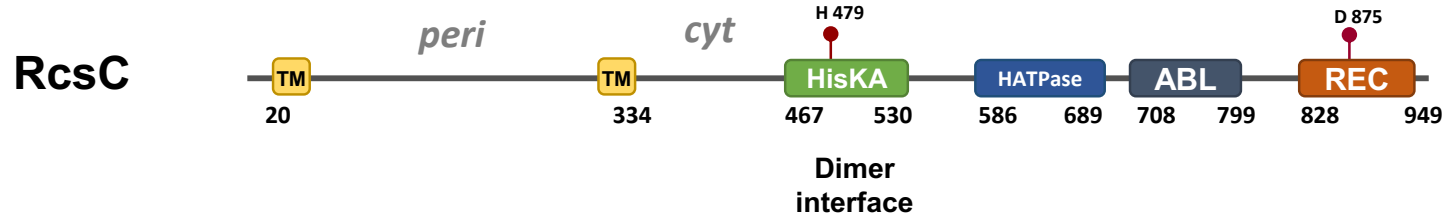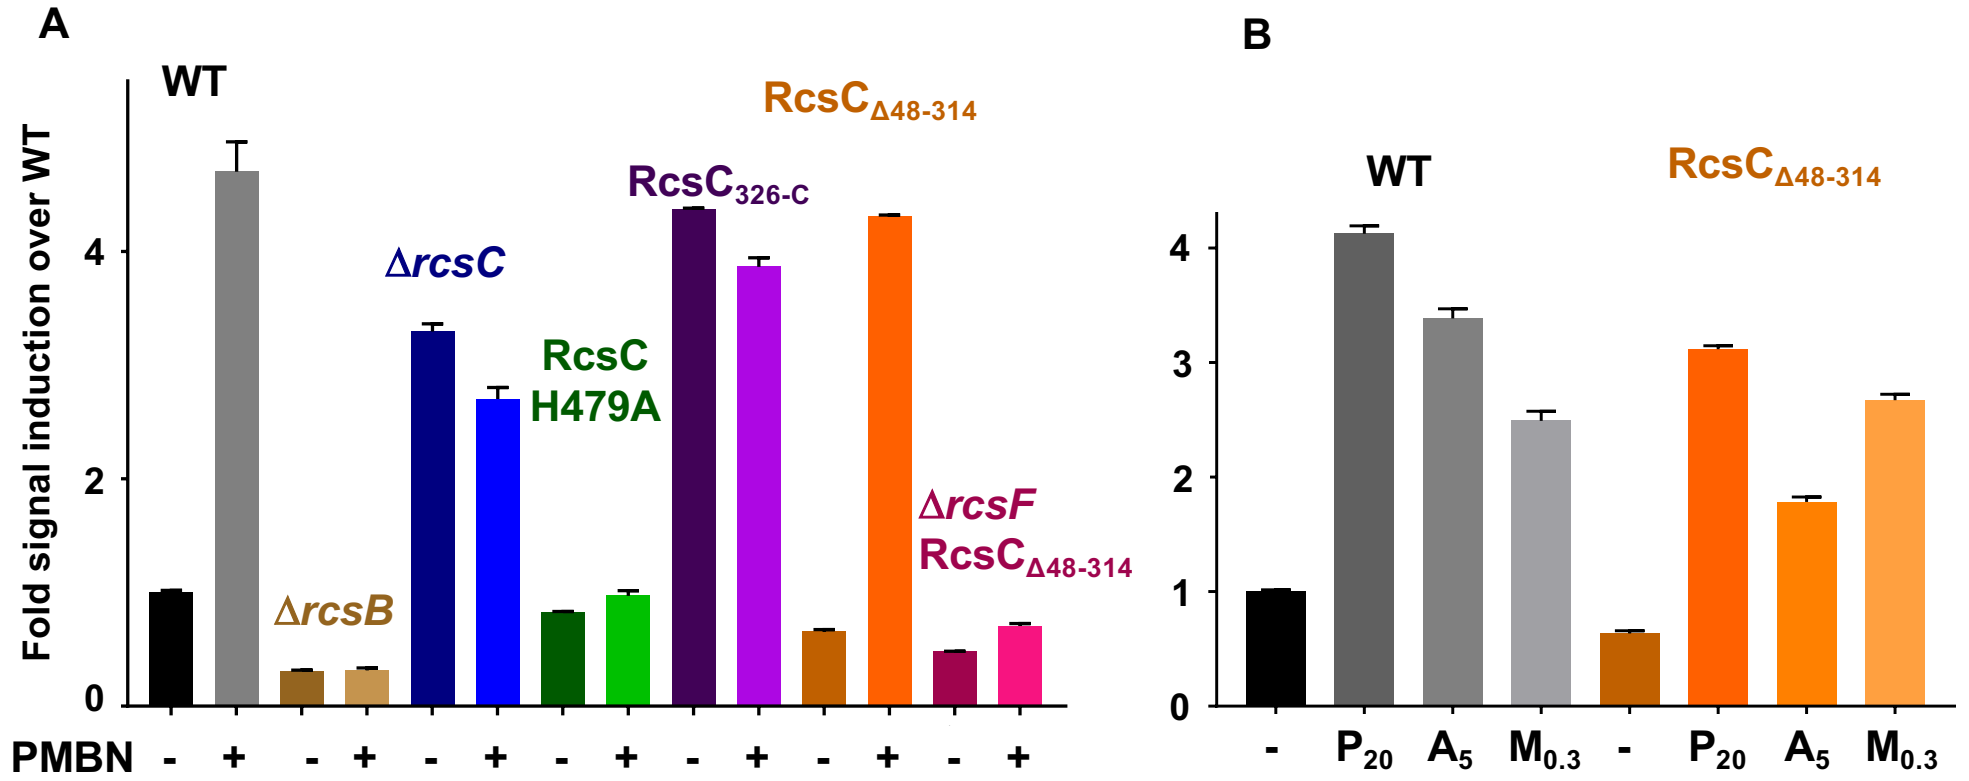

Figure 6

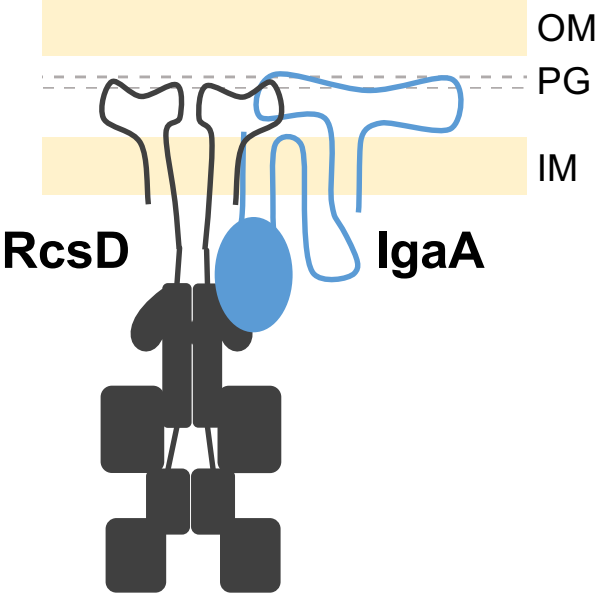

S1A-C

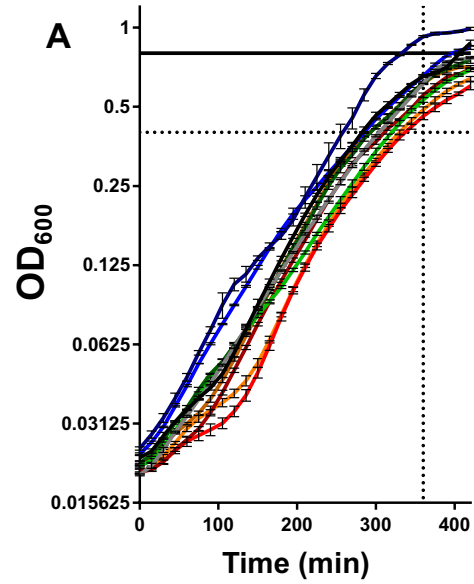

**Rcs mutants**

| WT<br>(EAW8)                       | WT<br>+PMBN20                      |
|------------------------------------|------------------------------------|
| $\Delta rc s C::T n 10$<br>(EAW18) | $\Delta rc s C::T n 10$<br>+PMBN20 |
| $\Delta rc s D 5 4 1$<br>(EAW19)   | $\Delta rc s D 5 4 1$<br>+PMBN20   |
| $\Delta rc s B::k a n$<br>(EAW31)  | $\Delta rc s B::k a n$<br>+PMBN20  |
| $\Delta rc s F::c a t$<br>(EAW32)  | $\Delta rc s F::c a t$<br>+PMBN20  |

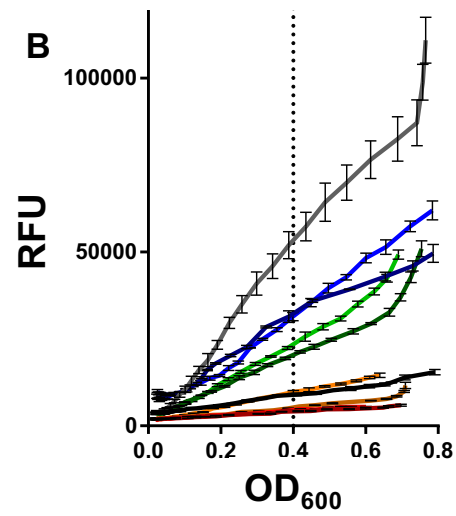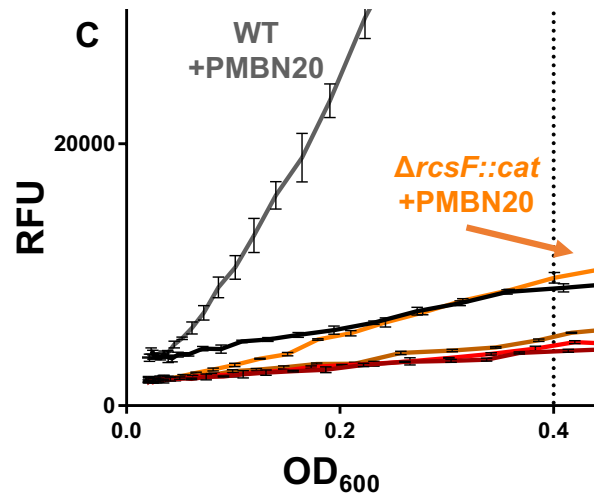

S1D

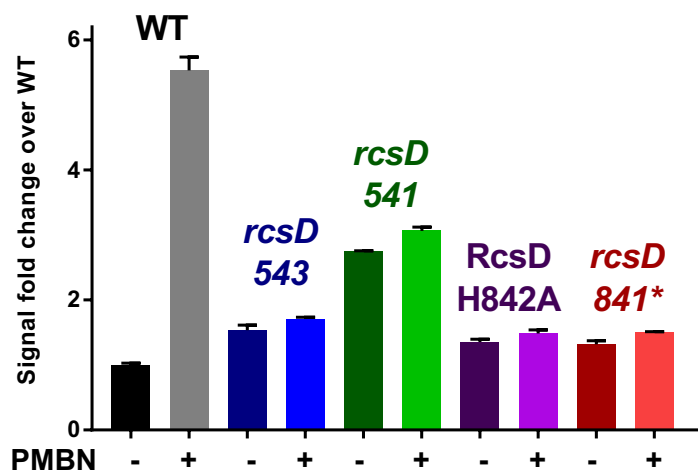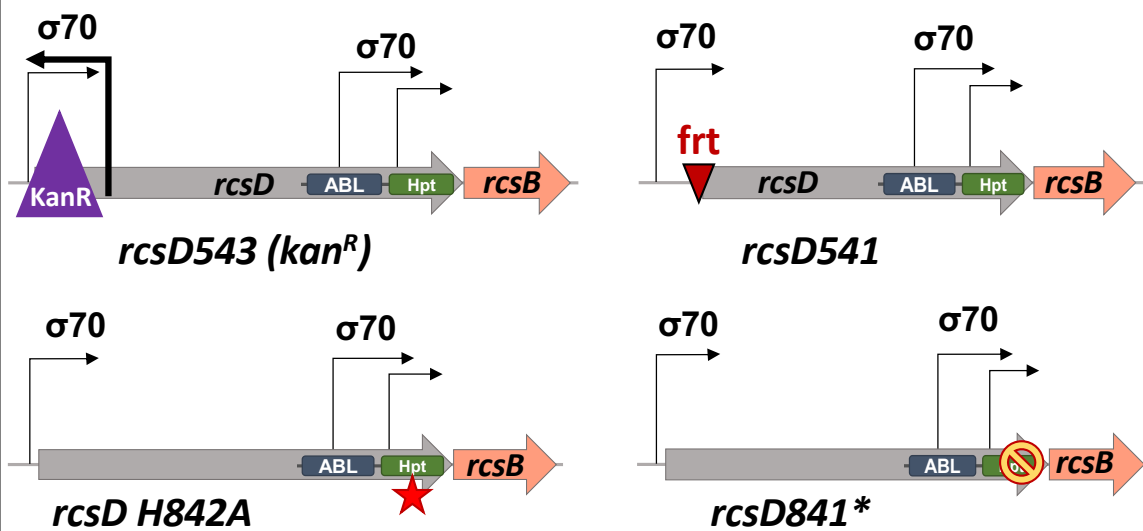

S1E

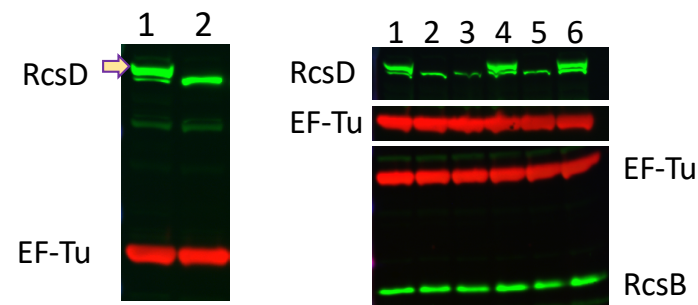

S1F

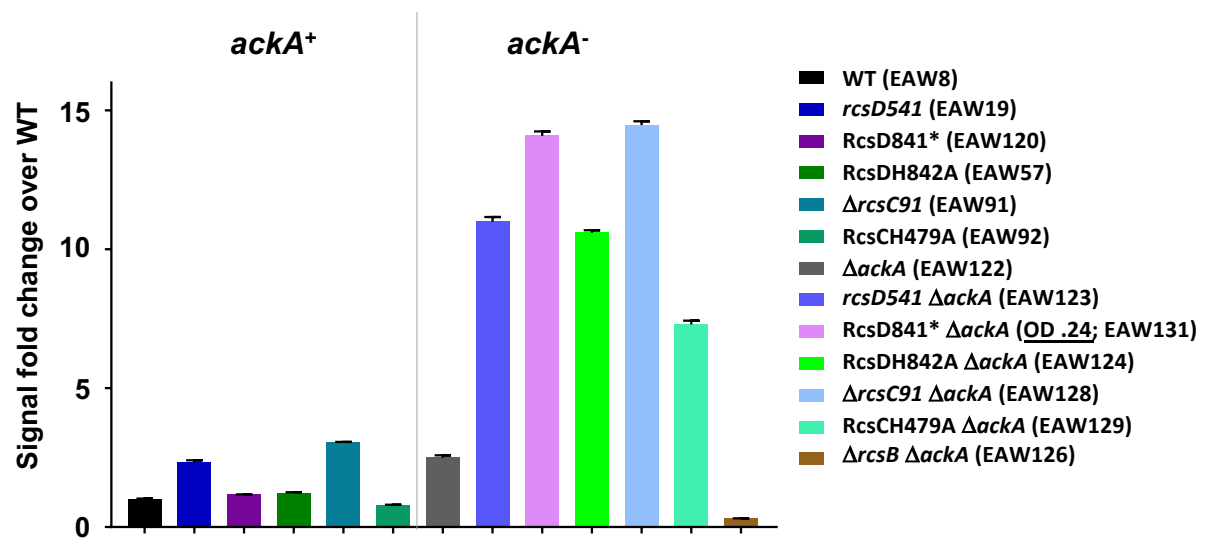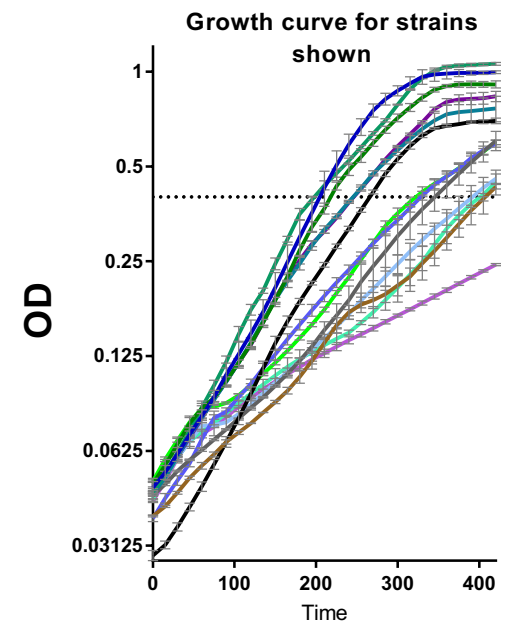

S2A

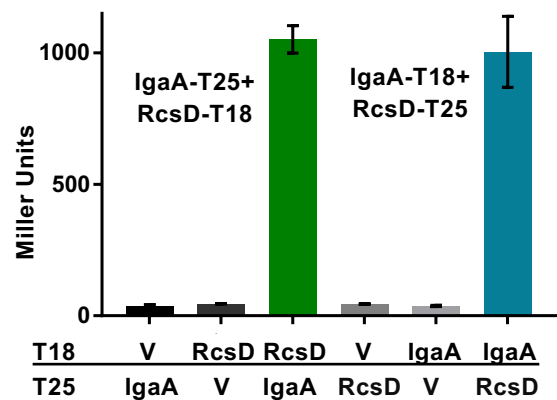

S2B

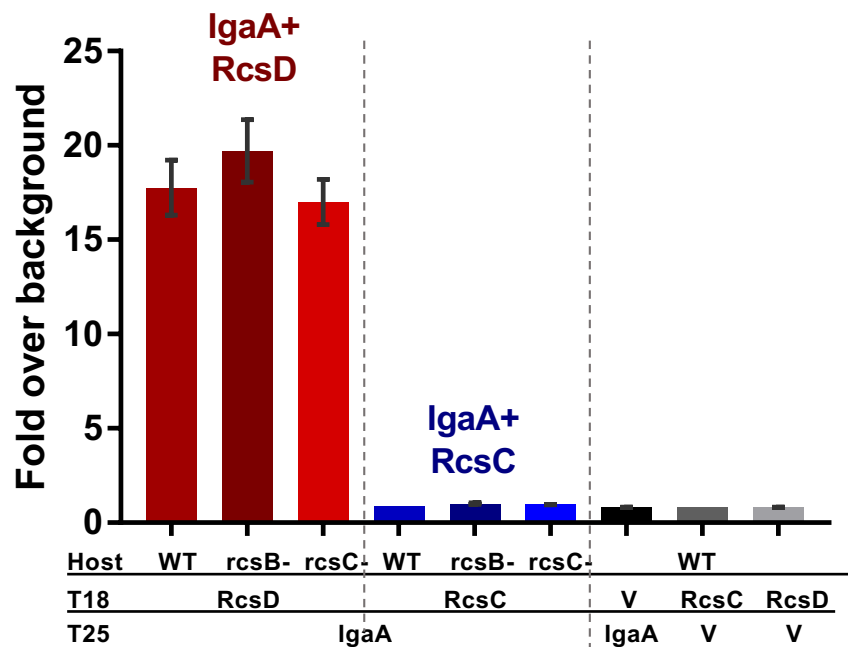

S2C

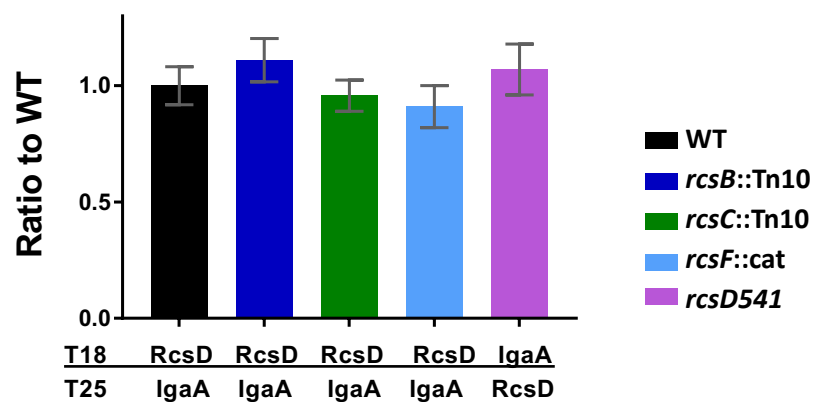

S2D

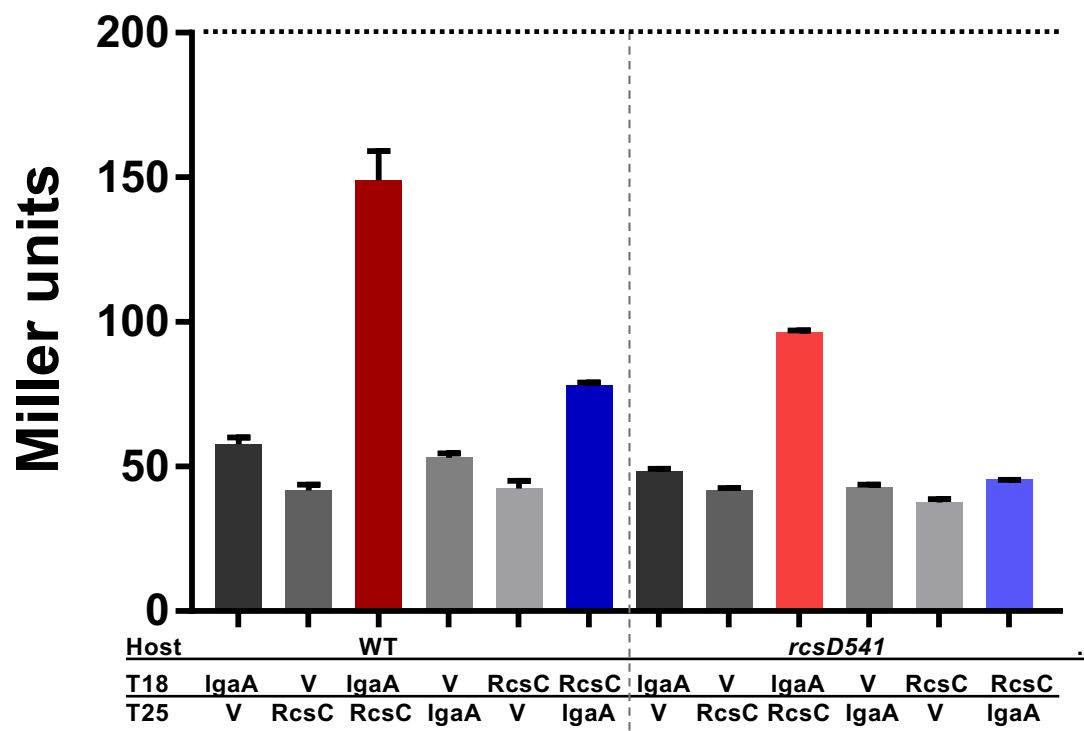

S2E

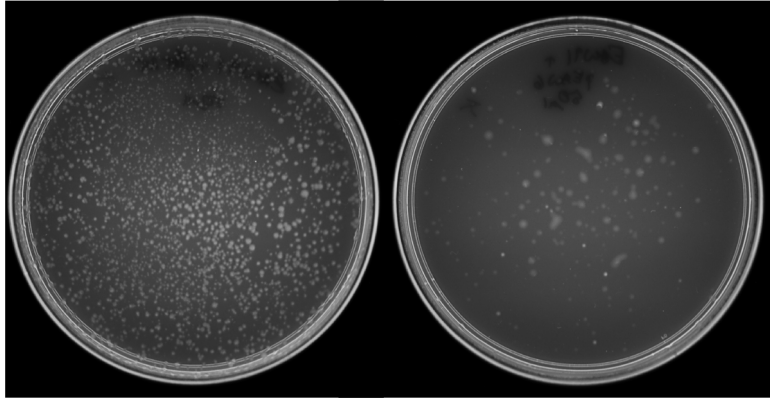

EAW91 ( $\Delta rcsC91$ )  
+ pKNT25  
*igaA::chl* transduction

EAW91 ( $\Delta rcsC91$ )  
+ pRcsC-T25  
*igaA::chl* transduction

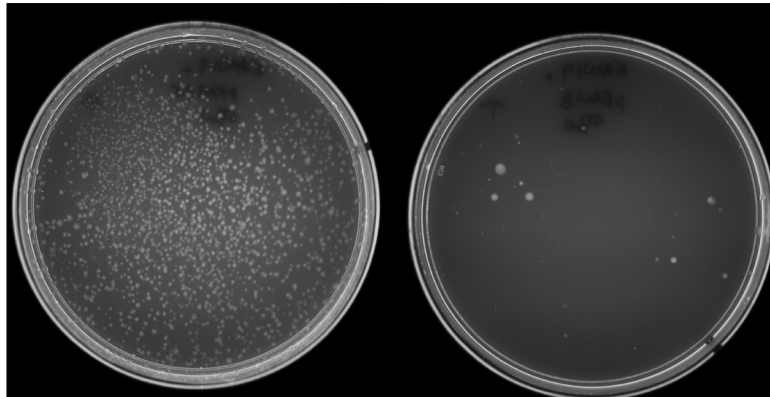

EAW19 (*rscD541*)  
+ pKNT25  
*igaA::chl* transduction

EAW19 (*rscD541*)  
+ pRcsD-T25  
*igaA::chl* transduction



## S2F

### RcsD fusions with T18

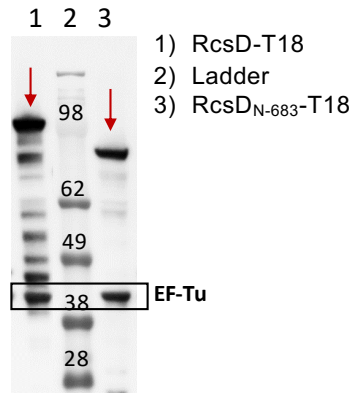

### IgaA fusions with T18

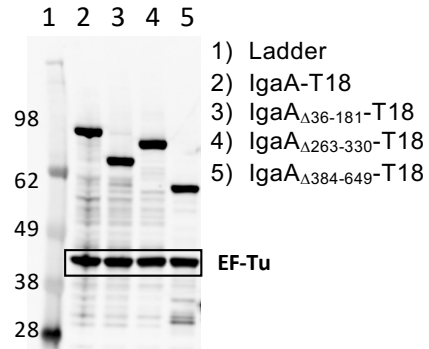

### RcsC-T18 fusions and RcsD383 truncation that did not interact produce protein of the expected MW

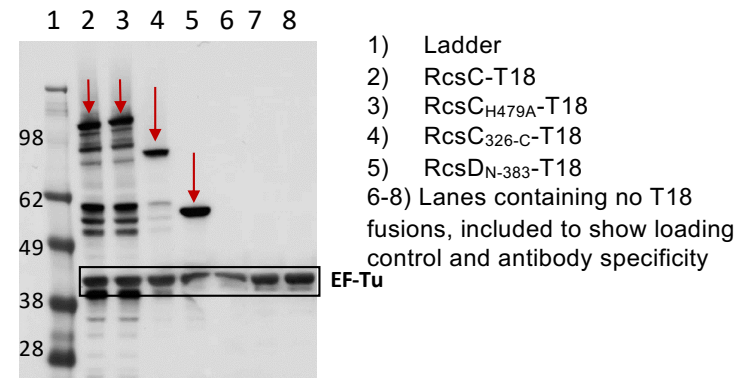

## S2G

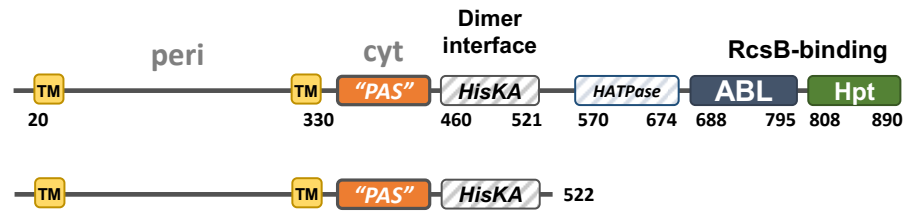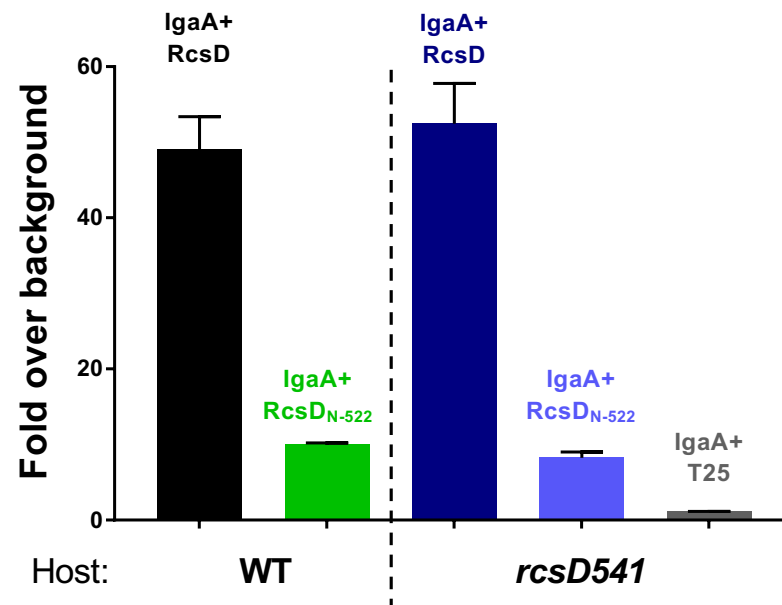

S3A

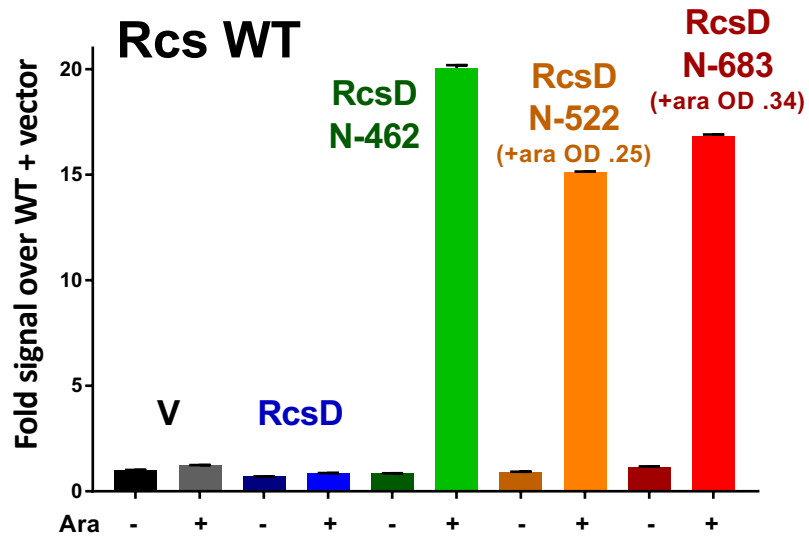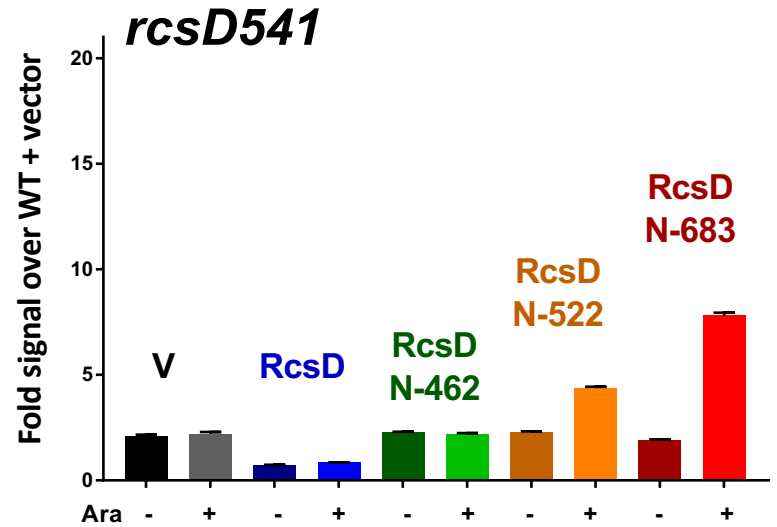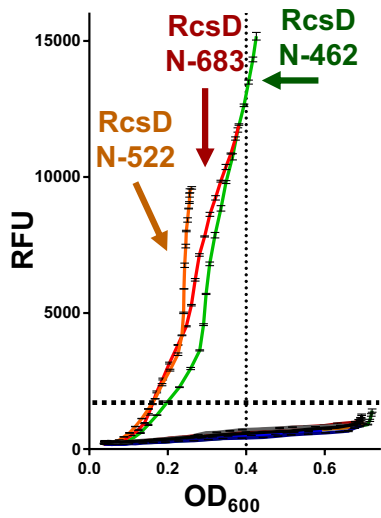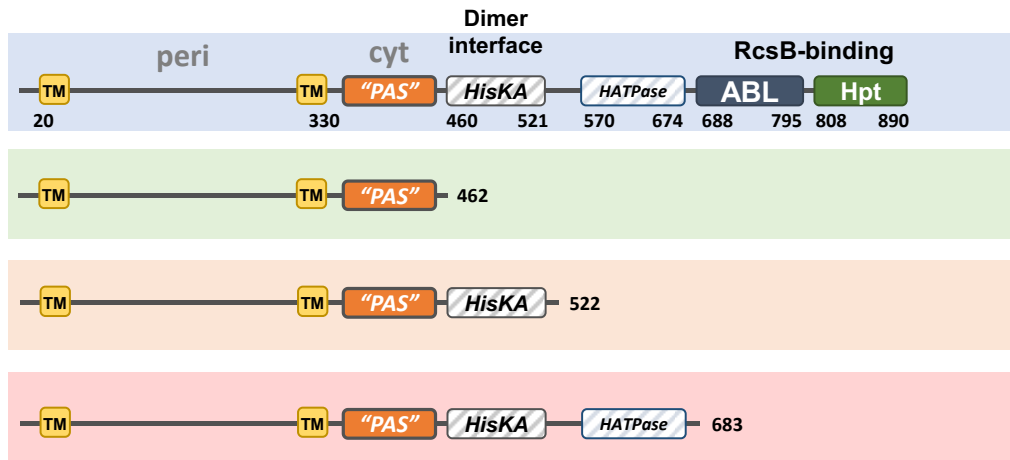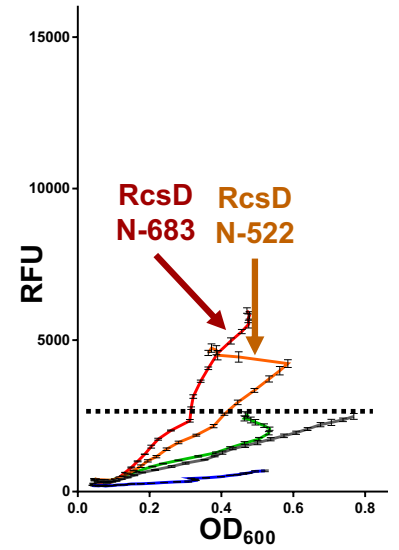

Fig S3B

On plasmids:

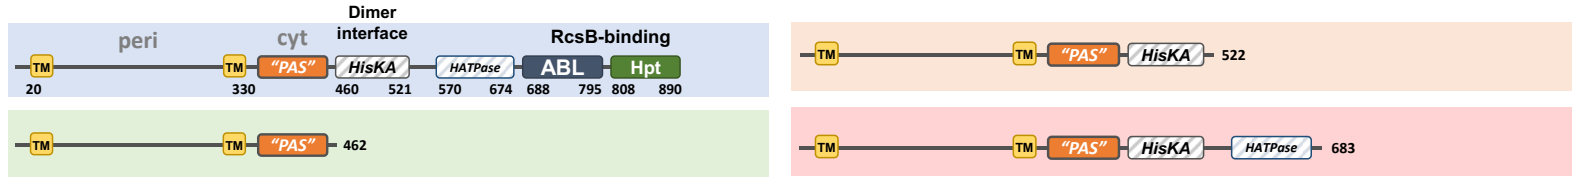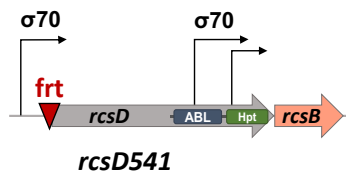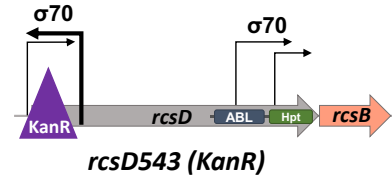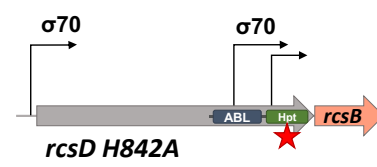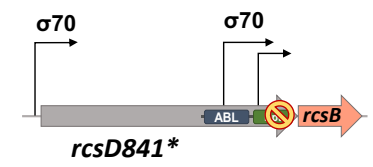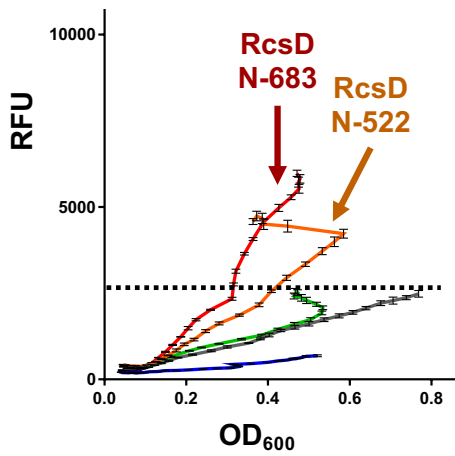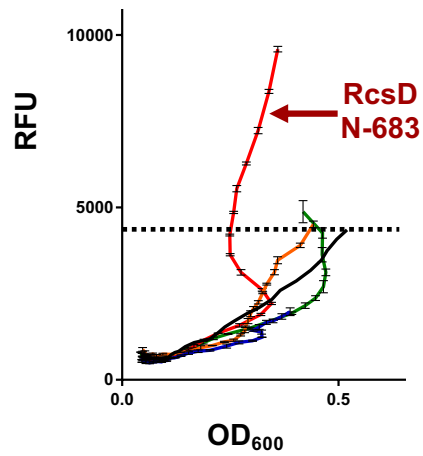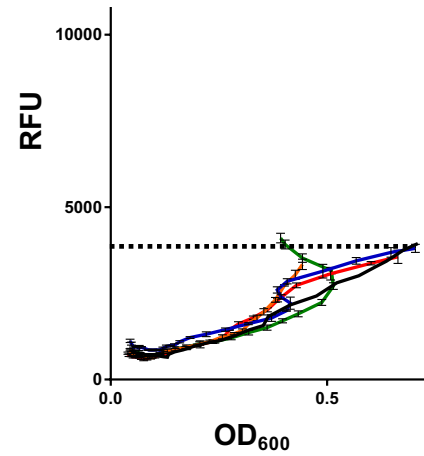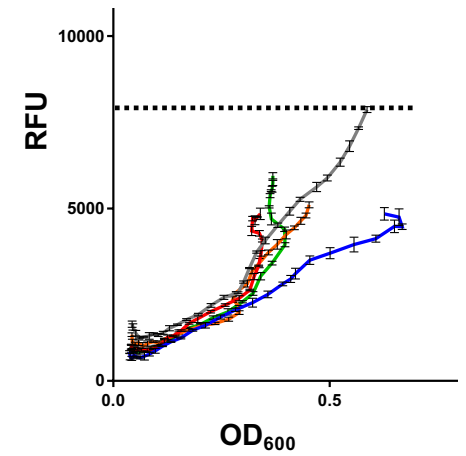

S3C

On plasmids:

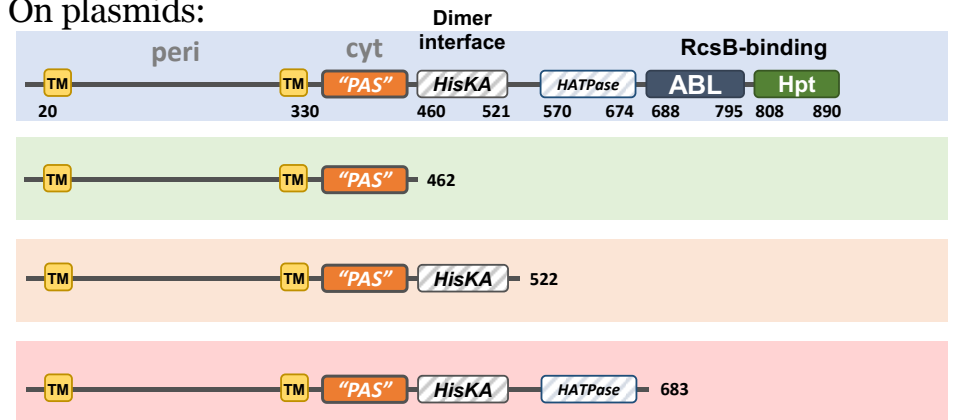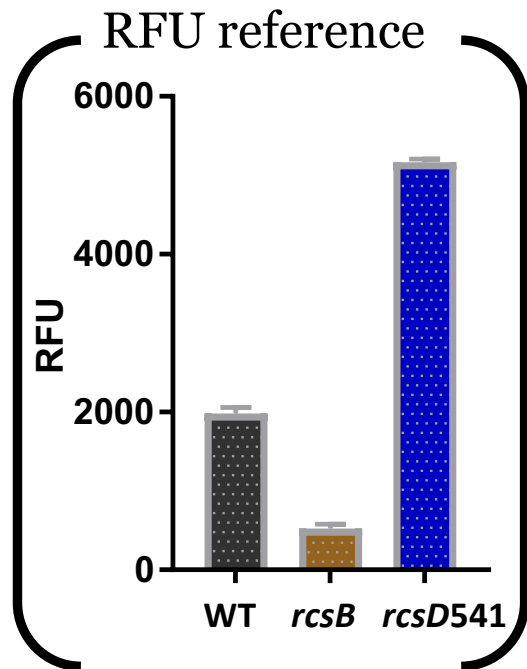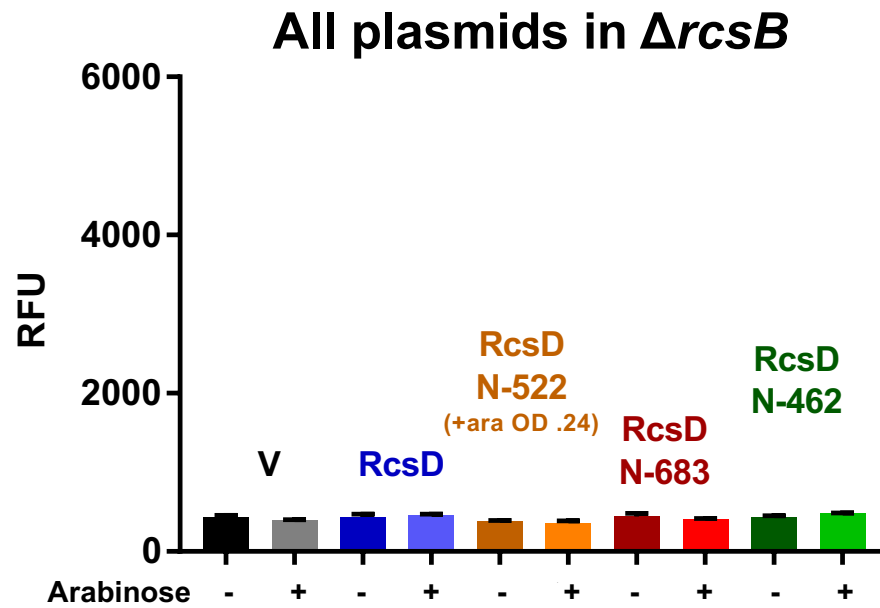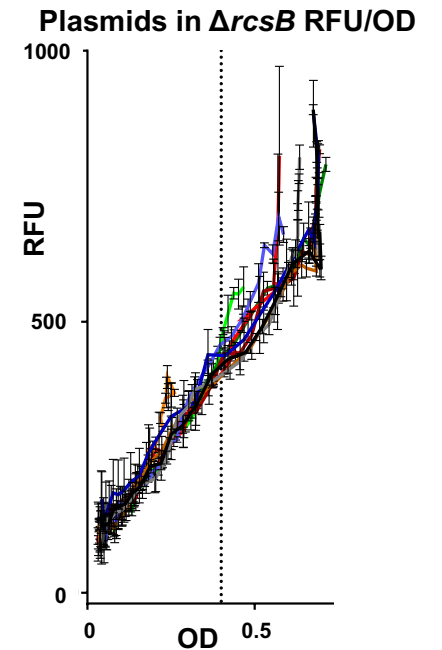

# S3D

***ΔrcsC91* and *ΔrcsC91 rcsD541* response to plasmid-borne RcsD<sup>+</sup>**

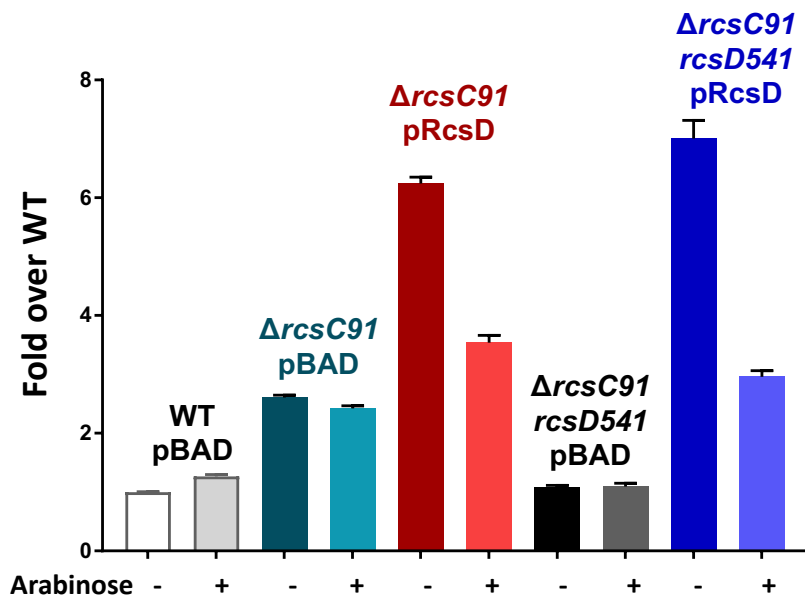

***ΔrcsC91 rcsD541* response to plasmid-borne RcsD and RcsD fragments**

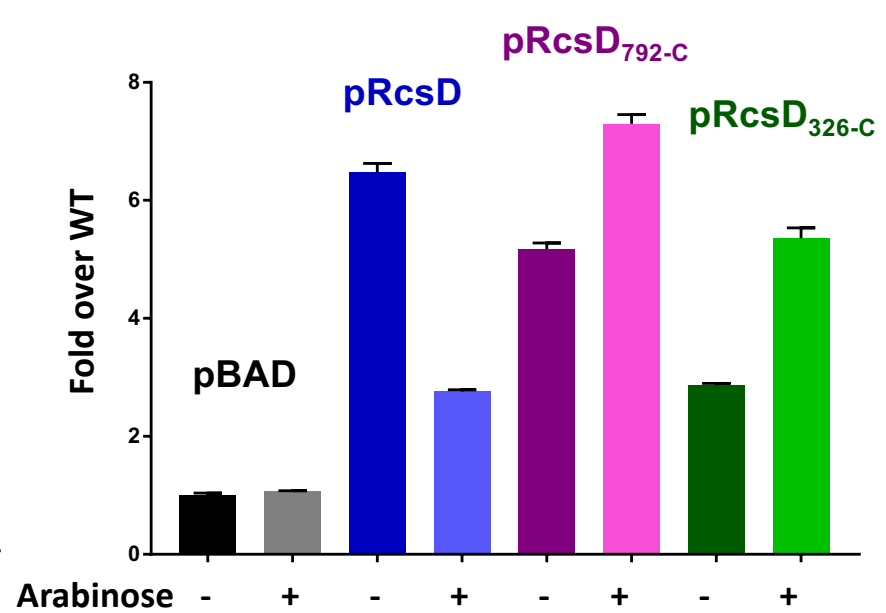

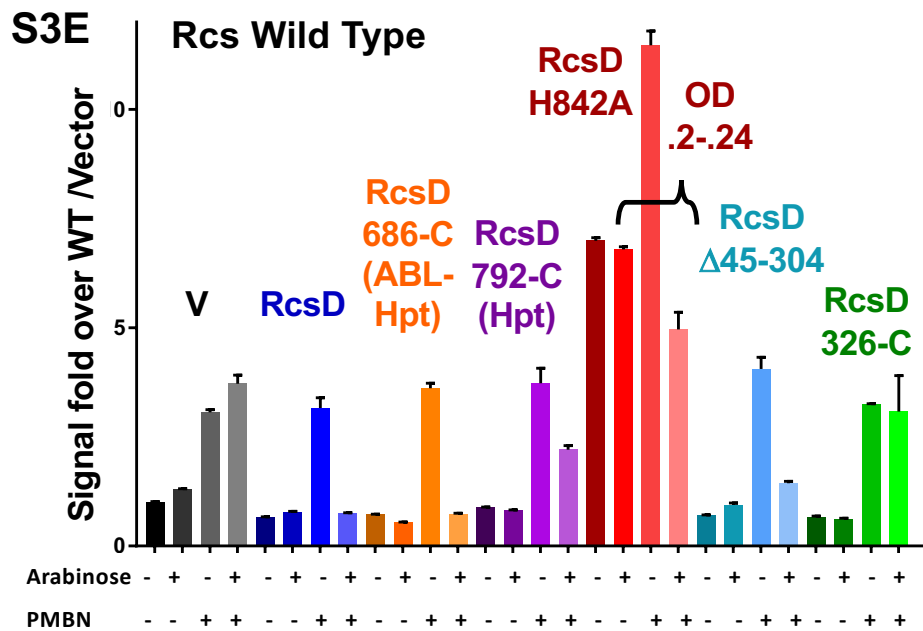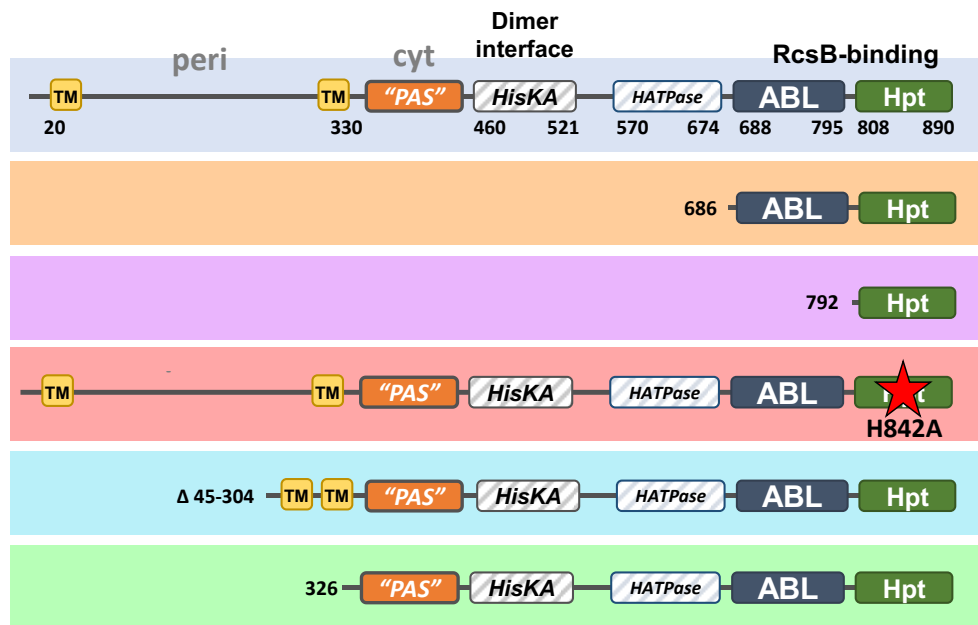

S3F

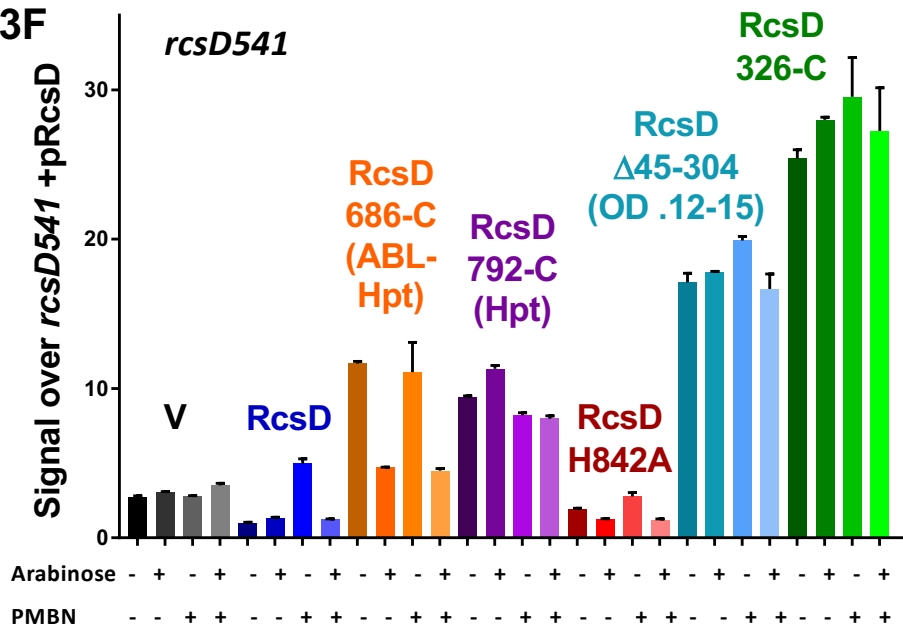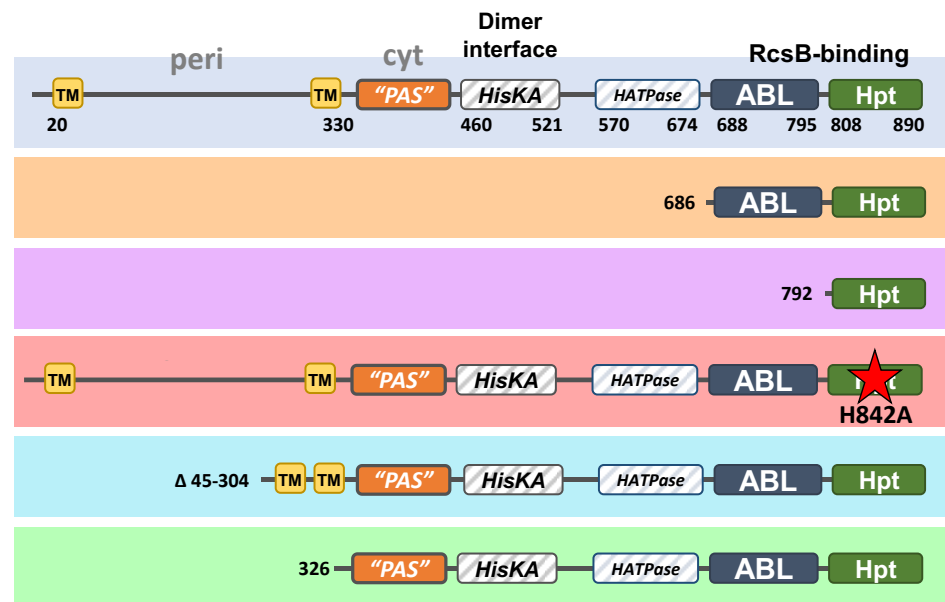



S3G

RcsD chromosomal alleles

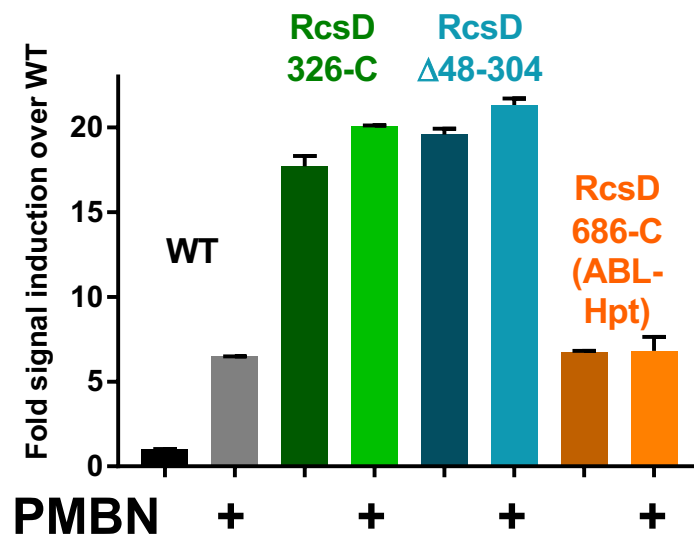

## S3H

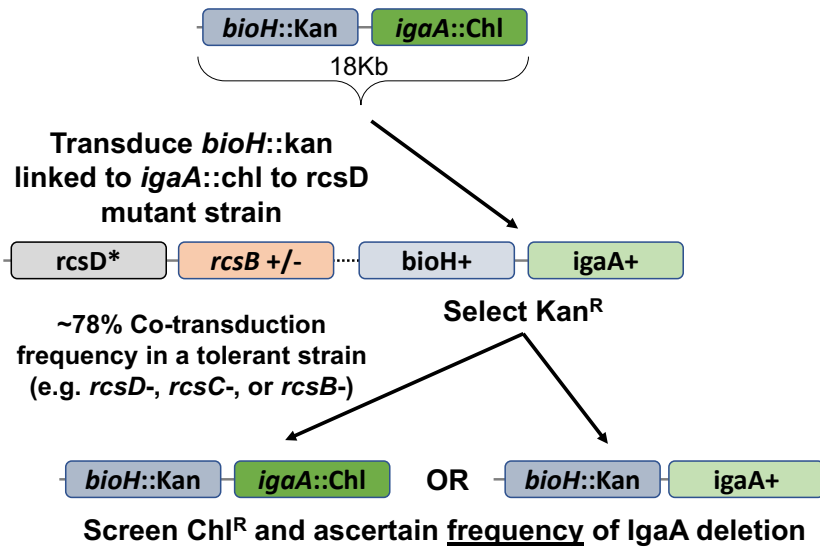

## Transduction linkage *bioH::Kan* with *igaA::Chl*

| Recipient Strain | Genotype                                                            | Parental mucoid? | Chl <sup>R</sup> colonies after selecting <i>bioH::Kan</i> <sup>R</sup> | Phenotype of IgaA::Chl <sup>R</sup> colonies                       |
|------------------|---------------------------------------------------------------------|------------------|-------------------------------------------------------------------------|--------------------------------------------------------------------|
| EAW8             | P <sub>rprA</sub> -mCherry, <i>araE</i> constitutive:: <i>gent</i>  | no               | 0/100                                                                   | n/a                                                                |
| EAW19            | EAW8; <i>rcsD541</i>                                                | no               | 41/53                                                                   | Parental                                                           |
| EAW53            | EAW8; $\Delta rcsD52::RcsD_{326-C}$                                 | yes              | 62/100**                                                                | **Heterogeneous mucoidy, indicates IgaA del is unstable.           |
| EAW54            | EAW8; $\Delta rcsDB54::RcsD_{326-C}$                                | no               | 36/50                                                                   | Parental                                                           |
| EAW57            | EAW8; <i>RcsDH842A</i>                                              | no               | 42/50                                                                   | Parental                                                           |
| EAW106           | EAW8; <i>RcsD</i> <sub>Δ48-304</sub> ; periplasmic deletion         | yes              | 1/50**                                                                  | **Colony still mucoid but more opaque than parental, likely mutant |
| EAW108           | EAW8; <i>RcsD</i> <sub>686-C</sub> (ABL-Hpt domains only)           | no               | 41/50                                                                   | Parental                                                           |
| EAW120           | EAW8; <i>rcsD841*</i>                                               | no               | 43/50                                                                   | Parental                                                           |
| EAW121           | EAW8; <i>rcsDT411A</i>                                              | no               | 4/55**                                                                  | **Heterogeneous mucoidy, indicates IgaA del is unstable            |
| EAW91            | EAW8; $\Delta rcsC91$                                               | no               | 50/59                                                                   | Parental                                                           |
| EAW92            | EAW8; <i>rcsCH479A</i>                                              | no               | 39/50                                                                   | Parental                                                           |
| EAW56            | EAW8; <i>RcsC</i> <sub>326-C</sub>                                  | no               | 37/50                                                                   | Parental                                                           |
| EAW70            | EAW8; $\Delta rcsC51::rcsCD48-314$ <i>RcsC</i> periplasmic deletion | no               | 45/50                                                                   | Mucoid with streaks of non-fluorescent colonies, unstable          |

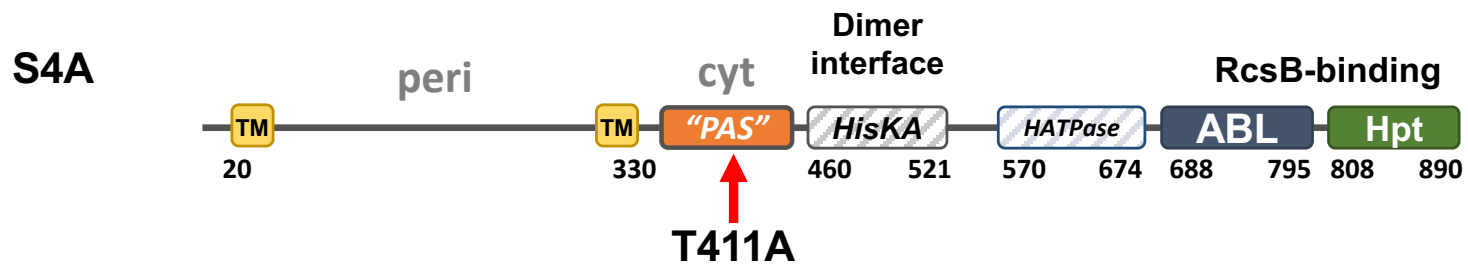

*rcsD541* with plasmid-borne RcsD alanine point mutants

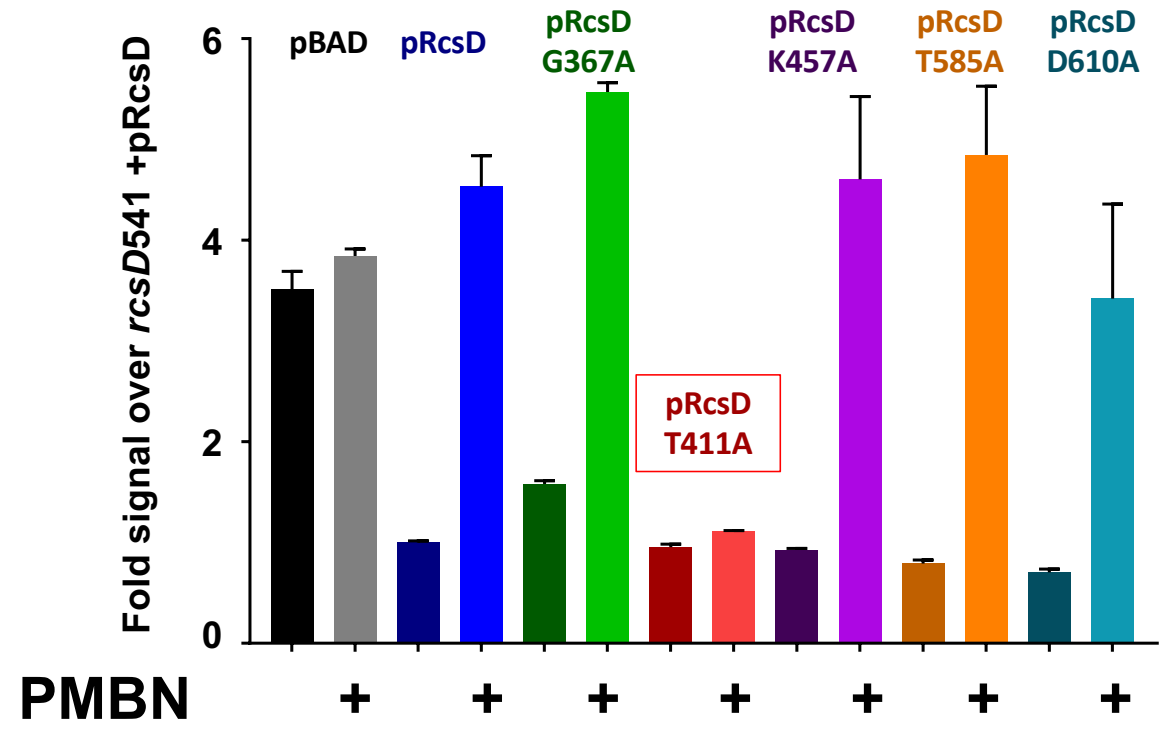

S4B

Beta-galactosidase activity  
fold over background

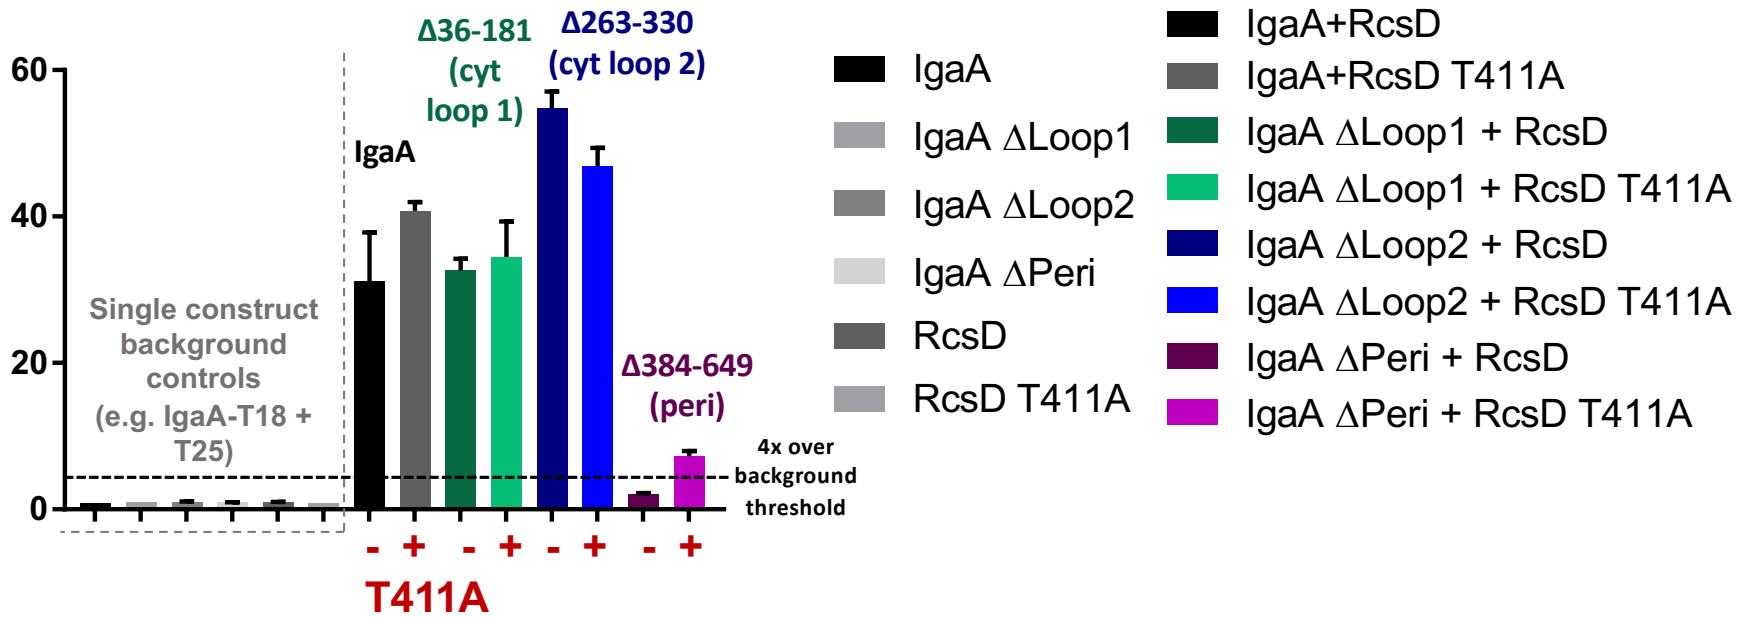

### S4C

#### IgaA point mutations in the periplasmic loop

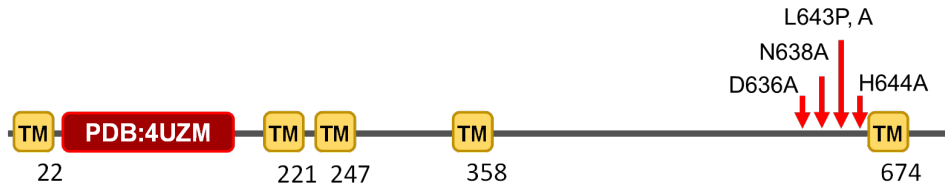

#### IgaA L643P levels in stationary match wild type

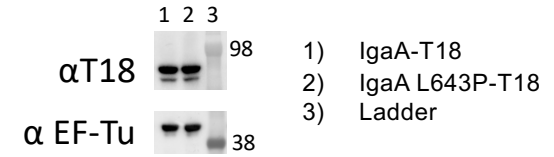

### S4D

#### Comparison of IgaA mutant binding to RcsD

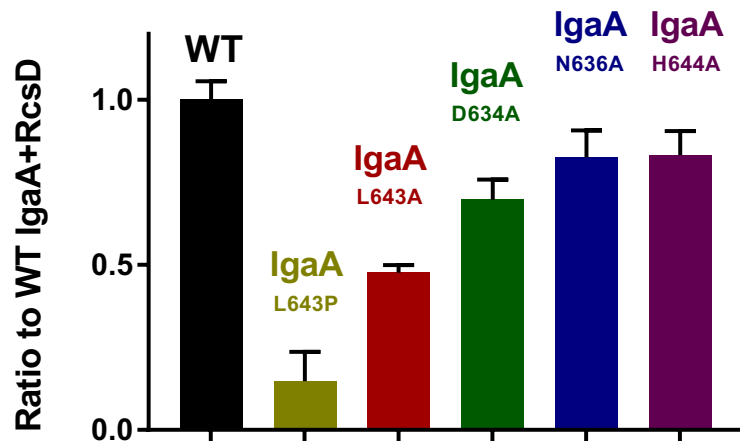

### S4E

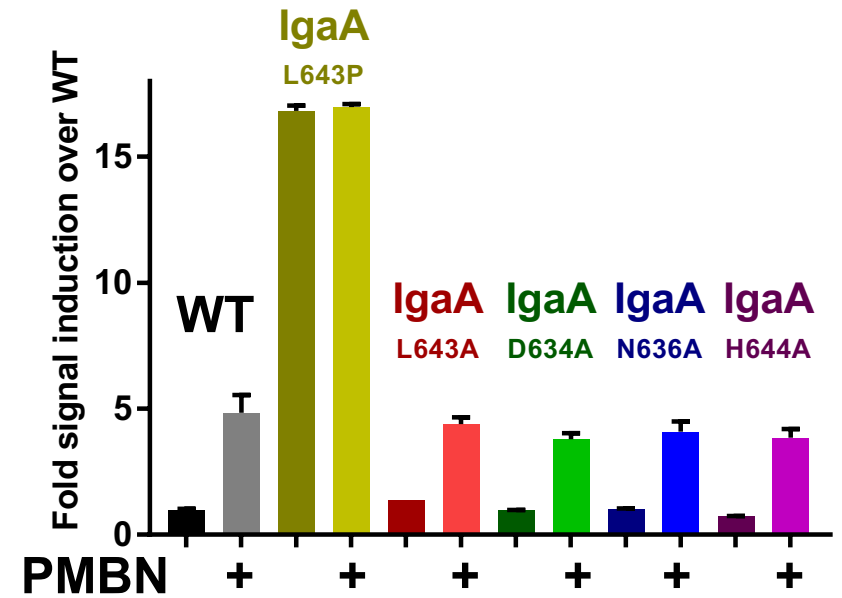

### S5A

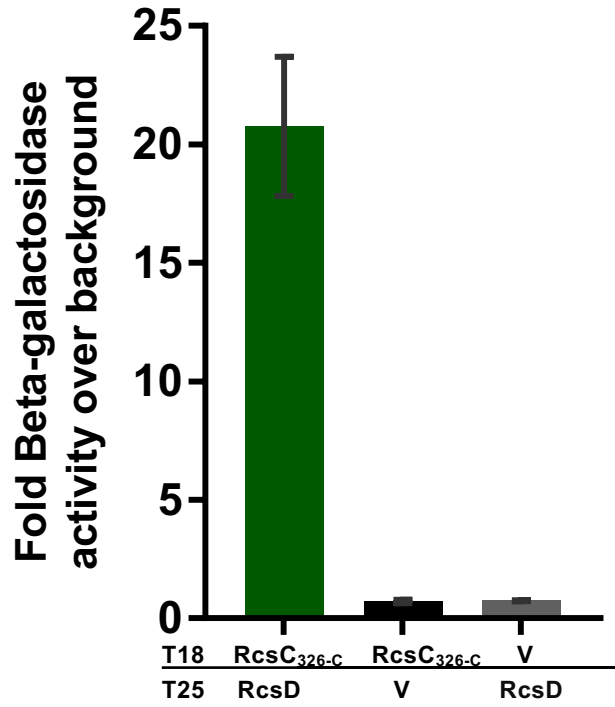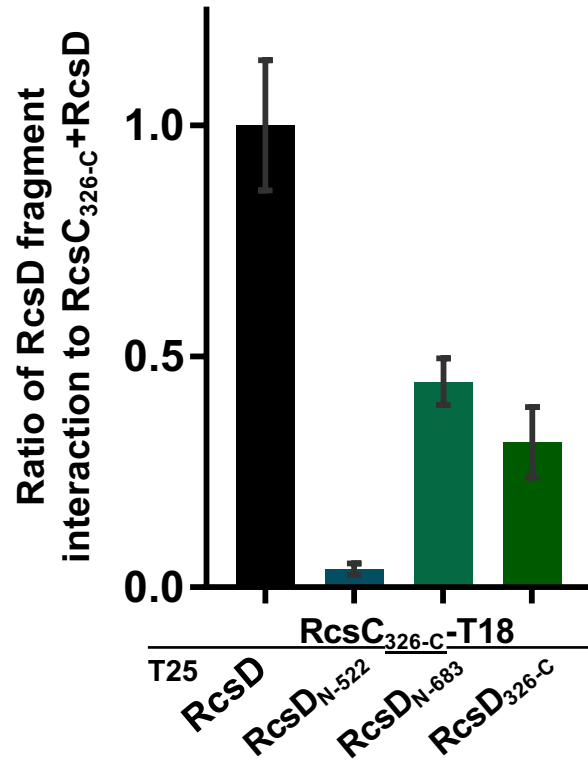

## S5B

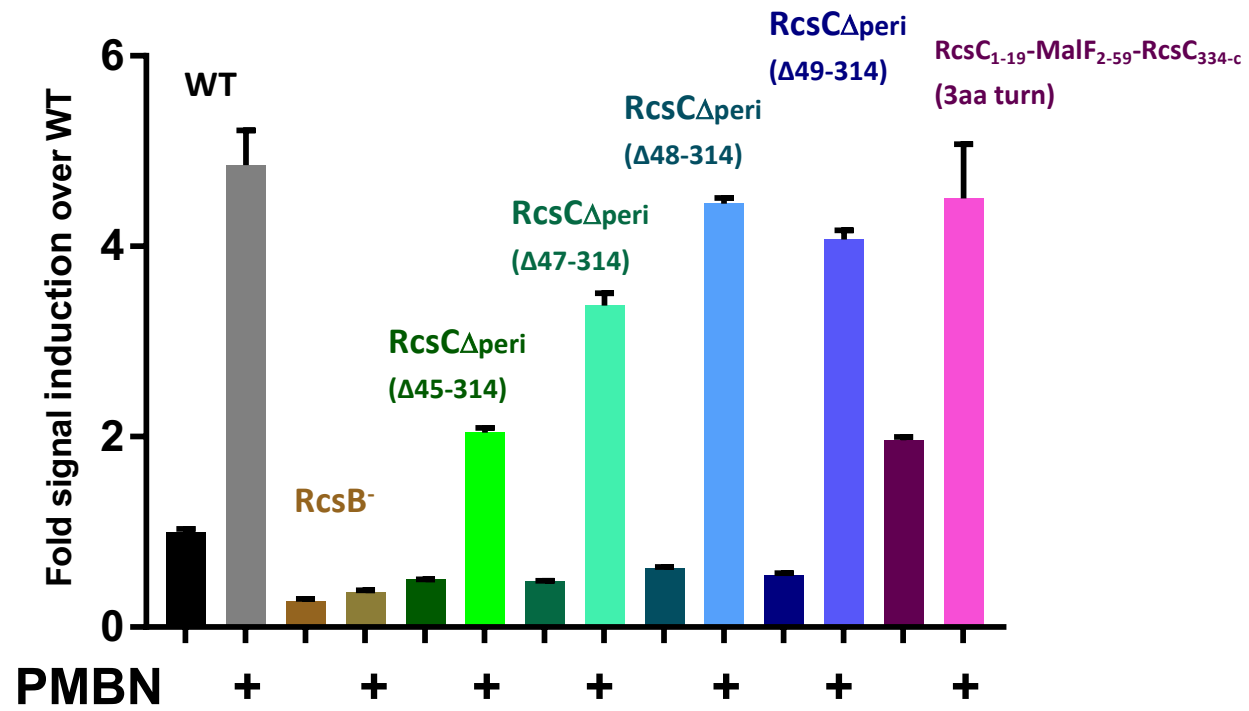

S6

**A. RcsC**

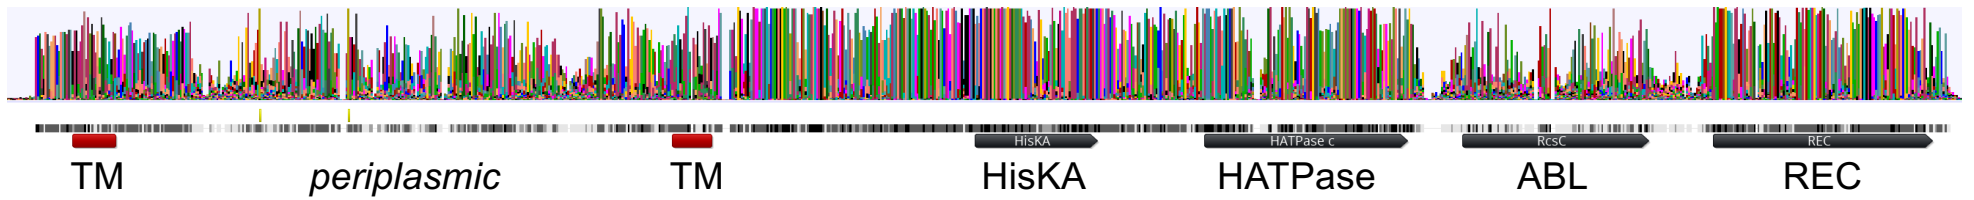

**B. RcsD**

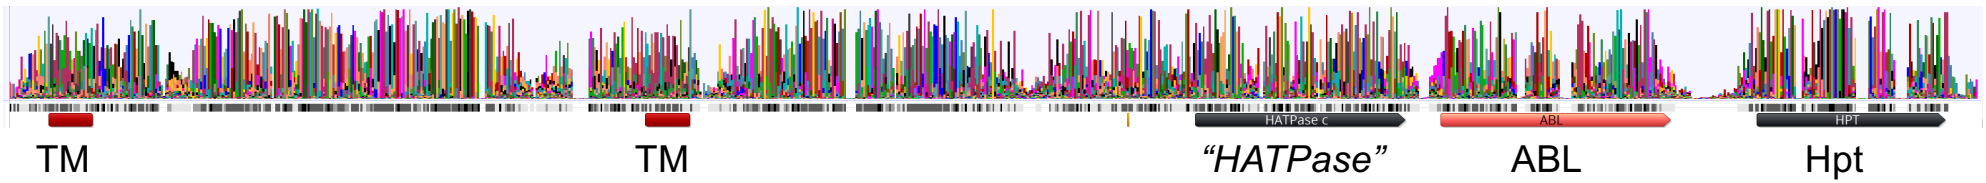

Source: https://www.biorxiv.org/content/10.1101/2020.01.14.906271v1.full.pdf
